# Supplementary material for: Synthesis, structural, and photophysical properties of pyrazolyl bis(pentafluorophenyl)boron complexes
Source: Royal Society of Chemistry journal article supplement (doi:10.1039/d3nj03025c), 2023-01-01
Supplement: d3nj03025c1.pdf [file d3nj03025c1.pdf]

## Supporting Information

for

### Synthesis, structural, and photophysical properties of pyrazolyl bis(pentafluorophenyl) boron complexes

Anna Chandrasekar Murali,<sup>[a]</sup> Preeta Pratakshya,<sup>[a]</sup> Pratiksha Patel,<sup>[a]</sup> Prakash Nayak,<sup>[a]</sup> Saravanan Peruncheralathan,<sup>[a]</sup> Krishnan Venkatasubbaiah\*<sup>[a]</sup>

<sup>a</sup>School of Chemical Sciences, National Institute of Science Education and Research (NISER), an OCC of Homi Bhabha National Institute, Bhubaneswar-752050, Odisha (India). \*E-mail: [krishnv@niser.ac.in](mailto:krishnv@niser.ac.in)

#### Experimental section:

**General information:** All the reactions were carried out under N<sub>2</sub> atmosphere using standard glove box, Schlenk line and vacuum line techniques. Solvents and other general reagents were purified according to standard procedures. All the reactions were monitored by thin layer chromatography. Nuclear magnetic resonance spectra were recorded on a 400 MHz or 700MHz Fourier transform NMR spectrometer (JEOL or Bruker) with CDCl<sub>3</sub> as a solvent. <sup>11</sup>B and <sup>19</sup>F NMR spectra were externally referenced to BF<sub>3</sub>.Et<sub>2</sub>O in CDCl<sub>3</sub> (δ=0 ppm) and α,α,α-trifluoro toluene in CDCl<sub>3</sub> (δ=-63.73 ppm), respectively. Chemical shifts are reported in δ ppm (parts per million) using residual solvent protons as the internal standard (δ 7.26 for CDCl<sub>3</sub> in <sup>1</sup>H NMR, δ 77.16 for CDCl<sub>3</sub> in <sup>13</sup>C NMR). Coupling constants are reported as J values in hertz (Hz). Splitting patterns are designated as s(singlet), d(doublet), t(triplet), q(quartet), dd(doublet of doublet), dt(doublet of triplet), m(multiplet) and br(broad). HRMS were recorded using Waters XEVO G2-XS QTOF mass spectrometer. Elemental analyses were performed in a Euro Vector EA 3000 CHNS analyzer. UV – Visible spectra were recorded on Agilent Technologies Cary 60 UV/Visible spectrometer. Fluorescence spectra and quantum yield were measured using Edinburgh spectrofluorimeter instrument FS5. For the measurement of absolute quantum yield, the concentration of the boron compounds was such as to give an absorbance of around 0.1 at excitation wavelength. Absolute total quantum yields were measured using an integrating sphere (Edinburgh instrument FS5) mounted in SC-30 compartment of the spectrofluorimeter, The time-resolved fluorescence studies, a time-correlated single-photon counting (TCSPC) spectrometer (Edinburgh, OB920) has been used with a laser of 330 nm as a source of excitation and an MCP photomultiplier (Hamamatsu R3809U-50) is used as a detector. In order to check the laser profile, a water:ludox (4:1) solution has been used. Using water:ludox (4:1) solution, the instrument response function (IRF) has been obtained. Single crystal X-ray diffraction data were collected on Rigaku Super Nova fine-focused dual diffractometer, with Cu Kα radiation (λ = 1.54178 Å) and Mo-Kα radiation (0.71073 Å) equipped with a PILATUS200K. The structures were solved by direct methods using SHELXT program and refined with least squares minimization with SHELXL using Olex2. All non-hydrogen atoms were refined with anisotropic displacement coefficients. The H atoms were placed at calculated positions and were refined as riding atoms. The SQUEEZE procedure of Olex2 was applied for removing one of the disorder chloroform solvent in compound 4 and 5. Boron compounds **1-6** are not stable in the acidic medium. Hence, we avoided column chromatography for purification. Photo stability of compound **1** and **4** are investigated with continuous illumination of 365 nm UV light for 30 min. The <sup>1</sup>H-NMR result that both the boron compounds are stable under UV light conditions. The films were prepared by mixing of polymethylmethacrylate (PMMA) (95 mg) and compound **2** (5 mg) in distilled THF, stirred (1h) and coated in a glass plate, then dried at open air for 24 h.

**Starting materials:** Commercially available 1,3-diphenylpropanedione, acetophenone, *o*-anisidine, 4-nitro-2-methoxyaniline, phenylboronic acid, stannous chloride, sodium nitrite, hydrazine monohydrate, Pd/C, 4-nitrophenylhydrazine, N-bromosuccinimide, copper(I) iodide, 1,10-phenanthroline, sodium carbonate, phenylboronic acid, iodobenzene, sodium cyanoborohydride, boron tribromide, potassium *tert*-butoxide, formaldehyde (37%) solution, magnesium flakes, carbon disulphide, methyl iodide, Palladium tetrakis(triphenylphosphine), sodium hydride, tris(pentafluorophenyl)borane were purchased from Alfa aesar and Sigma Aldrich. Glacial acetic acid, HCl, H<sub>2</sub>SO<sub>4</sub> was obtained from Spectrochem.

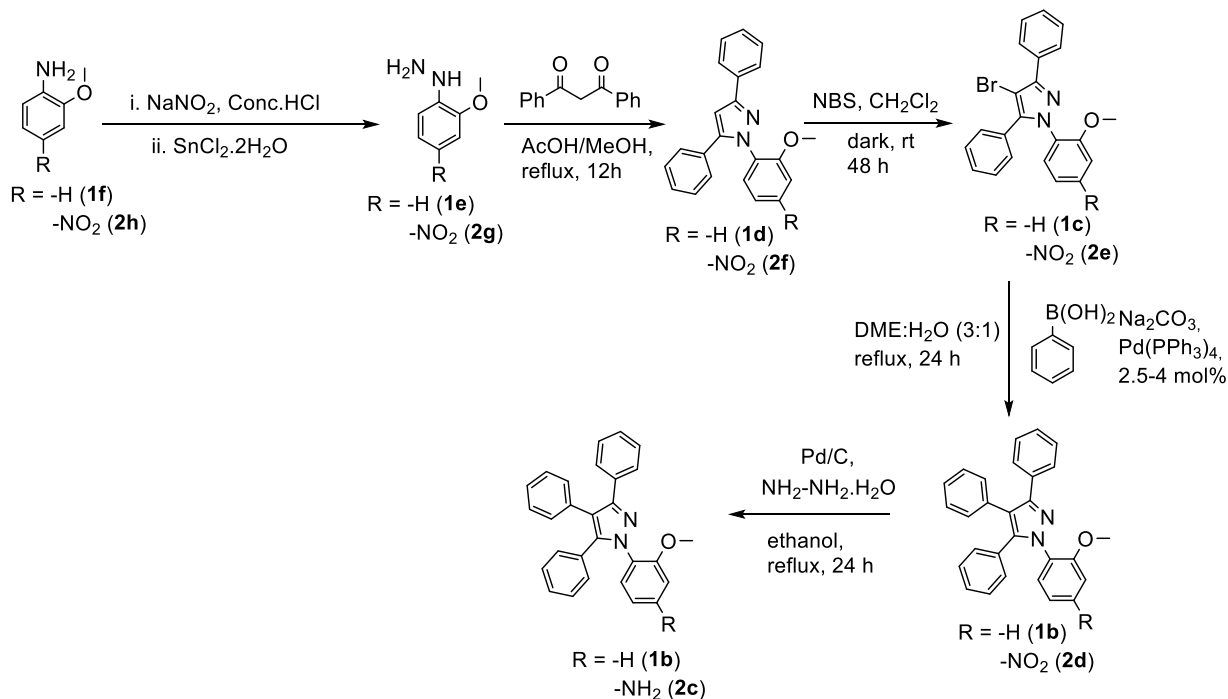

### Synthesis of (2-methoxyphenyl)hydrazine hydrochloride (1e)

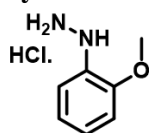

*o*-Anisidine (3.9 mL, 34.35 mmol, 1.0 eq) was added slowly to conc. HCl (50 mL) at 0 °C to form a suspension. A solution of sodium nitrite (2.40 g, 34.69 mmol, 1.1 eq) in distilled water was added dropwise to the suspension at -30 °C. The temperature was slowly allowed to reach 0 °C over a period of 2h. The reaction mixture was then added slowly to a suspension of stannous chloride (13.20 g, 69.39 mmol, 2.0 eq) in conc. HCl (25 mL) at -30 °C. The temperature was slowly allowed to reach room temperature while continuing stirring over a period of 3-4h. The reaction mixture was filtered and the precipitate was washed with cold conc. HCl and then vacuum dried. Without further purification the compound was used for the next reaction.

### Synthesis of 1-(2-methoxyphenyl)-3,5-diphenyl-1H-pyrazole (1d)

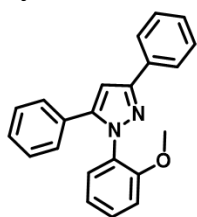

A mixture of 1,3-diphenylpropanedione (4.70 g, 20.90 mmol, 1.0 eq), (2-methoxyphenyl)hydrazine hydrochloride (1e) (4.80 g, 27.24 mmol, 1.3 eq), glacial acetic acid (45 mL) and methanol (45 mL) was refluxed for 12h. To the reaction mixture water was added (100 mL), the reaction mixture was extracted using dichloromethane (3 x 150 mL). The extracted organic phase was washed with brine and dried over anhydrous sodium sulphate. The solvent was concentrated and the product (1d) was purified using silica gel column chromatography (*n*-hexane/EtOAc (98:2)). Yield: 4.33 g (63.0%). <sup>1</sup>H NMR (400 MHz, CDCl<sub>3</sub>) δ 7.93 (d, *J* = 8.0 Hz, 2H), 7.54 (d, *J* = 8.0 Hz, 1H), 7.48

– 7.29 (m, 4H), 7.26 (s, 5H), 7.11 – 7.02 (m, 1H), 6.90 – 6.82 (m, 2H), 3.44 (s, 3H). <sup>13</sup>C NMR (101 MHz, CDCl<sub>3</sub>) δ 154.2, 152.0, 146.3, 133.3, 131.2, 130.1, 129.5, 129.0, 128.6, 128.3, 128.0, 127.9, 127.6, 126.0, 121.1, 112.4, 103.4, 55.5. HR-MS (ESI): calculated for C<sub>22</sub>H<sub>19</sub>N<sub>2</sub>O ([M + H]<sup>+</sup>): 327.1492, observed : 327.1441.

#### Synthesis of 4-bromo-1-(2-methoxyphenyl)-3,5-diphenyl-1H-pyrazole (1c)

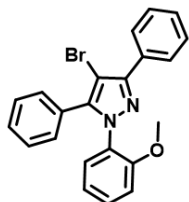

A mixture of 1-(2-methoxyphenyl)-3,5-diphenyl-1H-pyrazole (**1d**) (3.30 g, 10.20 mmol, 1.0 eq) and N-bromosuccinimide (2.20 g, 12.20 mmol, 1.2 eq) was taken in dichloromethane (60 mL). The reaction mixture was stirred at room temperature for 24h. After completion of the reaction, the product was extracted using water and dichloromethane (3 x 60 mL). The organic phase was collected and dried over anhydrous sodium sulphate. The solvent was concentrated and the product (**1c**) was purified using silica gel column chromatography (*n*-hexane/EtOAc (98:2)). Yield: 4.00 g (96.0%). <sup>1</sup>H NMR (400 MHz, CDCl<sub>3</sub>) δ 8.04 (d, *J* = 8.0 Hz, 2H), 7.52 – 7.45 (m, 3H), 7.43 – 7.38 (m, 1H), 7.35–7.30 (m, 6H), 7.02 (t, *J* = 7.6 Hz, 1H), 6.81 (d, *J* = 8.0 Hz, 1H), 3.44 (s, 3H). <sup>13</sup>C NMR (101 MHz, CDCl<sub>3</sub>) δ 153.8, 149.7, 143.8, 132.2, 130.3, 129.4, 129.3, 129.0, 128.8, 128.6, 128.3, 128.2, 128.0, 120.9, 112.1, 96.2, 93.1, 55.3. HR-MS (ESI): calculated for C<sub>22</sub>H<sub>18</sub>BrN<sub>2</sub>O ([M+H]<sup>+</sup>): 405.0597, 407.0578 observed : 405.0619, 407.0601.

#### Synthesis of 1-(2-methoxyphenyl)-3,4,5-triphenyl-1H-pyrazole (1b):

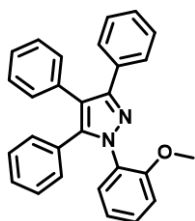

A mixture of dimethoxyethane (DME) (70 mL) and water (23 mL) was degassed for 30 minutes and added to a mixture of 4-bromo-1-(2-methoxyphenyl)-3,5-diphenyl-1H-pyrazole (**1c**) (3.50 g, 8.61 mmol, 1.0 eq), tetrakis(triphenylphosphine)palladium (0.40 g, 0.35 mmol, 0.04 eq), phenylboronic acid (1.40 g, 11.4 mmol, 1.2 eq) and sodium carbonate (2.70 g, 27.55 mmol, 3.0 eq) under nitrogen atmosphere. The reaction mixture was refluxed for 24h. After completion of the reaction (monitored via TLC), the reaction mixture was passed through a column of celite. The resultant mixture was extracted using water (100 mL) and dichloromethane (3 x 150 mL). The extracted organic phase was washed with brine and dried over anhydrous sodium sulphate. The solvent was concentrated and the product (**1b**) was purified using silica gel column chromatography (*n*-hexane/EtOAc (98:2)). Yield: 1.65 g (48 %). <sup>1</sup>H NMR (400 MHz, CDCl<sub>3</sub>): δ = 7.55 – 7.49 (m, 3H), 7.34 – 7.28 (m, 1H), 7.27 – 7.23 (m, 3H), 7.22 – 7.18 (m, 3H), 7.16 – 7.07 (m, 5H), 7.04 – 6.98 (m, 3H), 6.80 (d, *J* = 8.0 Hz, 1H), 3.40 (s, 3H). <sup>13</sup>C NMR (101 MHz, CDCl<sub>3</sub>): δ = 154.1, 150.2, 143.2, 133.5, 133.5, 130.9, 130.6, 130.0, 129.6, 129.3, 129.2, 128.6, 128.2, 128.2, 127.8, 127.8, 127.5, 126.6, 120.9, 119.1, 112.1, 55.3. HR-MS (ESI): calculated for C<sub>28</sub>H<sub>23</sub>N<sub>2</sub>O ([M+H]<sup>+</sup>): 403.1805, observed : 403.1823.

#### Synthesis of 2-(3,4,5-triphenyl-1H-pyrazol-1-yl)phenol (1a):

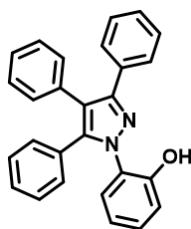

1-(2-Methoxyphenyl)-3,4,5-triphenyl-1H-pyrazole (**1b**) (2.00 g, 4.95 mmol, 1.0 eq) was taken in dry CH<sub>2</sub>Cl<sub>2</sub> (25 mL). BBr<sub>3</sub> (2.36 mL, 24.85mmol, 5.0 eq) in dry CH<sub>2</sub>Cl<sub>2</sub> (30 mL) was added dropwise to the reaction mixture under nitrogen atmosphere at -78 °C. The temperature was slowly allowed to reach to room temperature while stirring for 12h. The reaction mixture was then added to ice-cold water and filtered. The filtrate was collected and extracted using water and dichloromethane (3 x 100 mL). The extracted organic phase was washed with brine and dried over anhydrous sodium sulphate. The solvent was concentrated and the product (**1a**) was purified using silica gel column chromatography (*n*-hexane/EtOAc/ CH<sub>2</sub>Cl<sub>2</sub>

(80:10:10)). Crystallisation was done using CH<sub>2</sub>Cl<sub>2</sub>/EtOH. Yield: 1.5 g (78 %). <sup>1</sup>H NMR (400 MHz, CDCl<sub>3</sub>) δ = 9.83 (s, 1H), 7.54 – 7.48 (m, 2H), 7.34 – 7.22 (m, 9H), 7.18 – 7.13 (m, 2H), 7.13 – 7.07 (m, 4H) 6.63 – 6.56 (m, 2H). <sup>13</sup>C NMR (101 MHz, CDCl<sub>3</sub>) δ = 150.8, 149.9, 142.2, 133.6, 132.4, 132.2, 130.8, 130.4, 129.6, 128.8, 128.6, 128.4, 128.4, 128.4, 128.3, 128.3, 127.1, 125.4, 120.8, 119.1, 118.6. HR-MS (ESI): calculated for C<sub>27</sub>H<sub>21</sub>N<sub>2</sub>O ([M+H]<sup>+</sup>): 389.1648, observed : 389.1676.

**Synthesis of complex 1:** 2-(3,4,5-Triphenyl-1H-pyrazol-1-yl)phenol (**1a**) (0.30 g, 0.77 mmol,

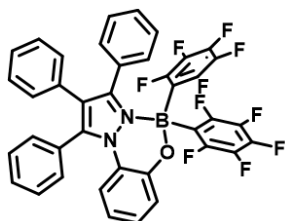

1.0 eq) was taken in a sealed tube and tris(pentafluorophenyl)borane (0.43 g, 0.85 mmol, 1.1 eq) was added to it under nitrogen atmosphere followed by dry toluene (10 mL) and refluxed for 24h. The reaction mixture was cooled transferred to a round bottom flask and the solvent was evaporated by vacuum distillation leaving behind a glassy residue. Dry hexane (25 mL) was added to the round bottom flask and sonicated for 5 min. The white precipitate formed was collected by

filtration and dried under vacuum. Crystallisation was done using CH<sub>2</sub>Cl<sub>2</sub>/*n*-hexane. Yield: 0.30 g (54 %). <sup>1</sup>H NMR (400 MHz, CDCl<sub>3</sub>) δ = 7.51 (t, *J*=8.0, 1H), 7.43 (t, *J*=8.0, 2H), 7.35 – 7.28 (m, 2H), 7.22 – 7.12 (m, 2H), 7.11 – 6.98 (m, 8H), 6.81 (d, *J*=8.0, 2H), 6.55 (d, *J*=4.0, 2H). <sup>13</sup>C NMR (101 MHz, CDCl<sub>3</sub>) δ = 150.4, 148.1 (d, *J* = 243.41 Hz), 147.9, 140.3 (d, *J* = 260.58 Hz) 136.9 (d, *J* = 248.92 Hz) 130.6, 130.5, 130.3, 129.8, 129.6, 129.5, 128.7, 128.4, 128.2, 127.9, 127.5, 124.7, 123.8, 120.9, 120.8, 120.0. <sup>19</sup>F NMR (376 MHz, CDCl<sub>3</sub>) δ = -132.98 (bs, 4F, Pf), -156.33 (t, 2F, Pf), -164.12 (bs, 4F, Pf). <sup>11</sup>B NMR (128 MHz, CDCl<sub>3</sub>) δ -0.72. HR-MS (ESI): calculated for C<sub>39</sub>H<sub>20</sub>BF<sub>10</sub>N<sub>2</sub>O ([M+H]<sup>+</sup>): 733.1545, observed : 733.1591. Anal. Calcd for C<sub>39</sub>H<sub>19</sub>BF<sub>10</sub>N<sub>2</sub>O: C, 63.96; H, 2.62, N, 3.83. Found: C, 64.35; H, 1.99, N, 4.19.

**Synthesis of (2-methoxy-4-nitrophenyl)hydrazine hydrochloride (2g)**

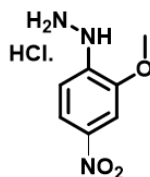

2-Methoxy-4-nitroaniline (15.10 g, 90.00 mmol, 1.0 eq) was added slowly to conc. HCl (100 mL) at 0 °C to form a suspension. A solution of sodium nitrite (9.3 g, 135.00 mmol, 1.5 eq) in distilled water was added dropwise to the suspension at -30 °C. The temperature was then slowly allowed to reach 0 °C over a period of 2h. The reaction mixture was then added slowly to a suspension of stannous chloride (40.6 g, 180.00

mmol, 2.0 eq) in conc. HCl (50 mL) at -30 °C. The temperature was slowly allowed to reach room temperature while continuing stirring over a period of 3-4h. The reaction mixture was filtered and the precipitate was washed with cold conc. HCl and then vacuum dried. Without further purification the compound was used for the next reaction.

**Synthesis of 1-(2-methoxy-4-nitrophenyl)-3,5-diphenyl-1H-pyrazole (2f)**

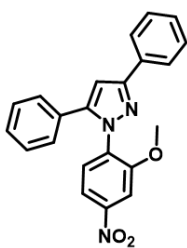

Compound **2f** was prepared following a procedure similar to that used for **1d**. The quantities involved are as follows: 1,3-Diphenylpropanedione (10.10 g, 45.09 mmol, 1.0 eq), (2-methoxy-4-nitrophenyl) hydrazine hydrochloride (**2g**) (19.00 g, 90.18 mmol, 2.0 eq), glacial acetic acid (90 mL) and methanol (90 mL). The product (**2f**) was purified using silica gel column chromatography (*n*-hexane/EtOAc (98:2)). Crystallisation was done using CH<sub>2</sub>Cl<sub>2</sub>/*n*-hexane. Yield: 10.2 g (60.0%). <sup>1</sup>H NMR (400 MHz, CDCl<sub>3</sub>) δ 7.99 (d, *J* = 8.0 Hz, 1H), 7.94 – 7.86 (m, 2H), 7.80 (d, *J* = 8.0

Hz, 1H), 7.70 (d, *J* = 4.0 Hz, 1H), 7.47 – 7.41 (m, 2H), 7.37 (d, *J* = 7.4 Hz, 1H), 7.32 – 7.28 (m, 3H) 7.28 – 7.18 (m, 2H), 6.87 (s, 1H), 3.45 (s, 3H). <sup>13</sup>C NMR (101 MHz, CDCl<sub>3</sub>) δ 153.9, 153.3, 148.3,

146.7, 135.1, 132.8, 130.9, 129.2, 128.8, 128.6 (2C), 128.4, 127.3, 126.0, 116.5, 107.6, 104.5, 55.9. HR-MS (ESI): calculated for  $C_{22}H_{17}N_3O_3Na$  ( $[M+Na]^+$ ): 394.1162, observed : 394.1185.

#### Synthesis of 4-bromo-1-(2-methoxy-4-nitrophenyl)-3,5-diphenyl-1H-pyrazole (2e)

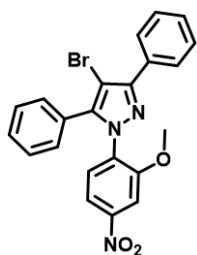

Compound **2e** was prepared following a procedure similar to that used for **1c**. The quantities involved are as follows: 1-(2-Methoxy-4-nitrophenyl)-3,5-diphenyl-1H-pyrazole (**2f**) (8.10 g, 21.81 mmol, 1.0 eq) and N-bromosuccinimide (4.60 g, 26.17 mmol, 1.2 eq). Yield: 9.56 g (97.0%).  $^1H$  NMR (400 MHz,  $CDCl_3$ )  $\delta$  8.00 (d,  $J = 8.0$  Hz, 2H), 7.95 (d,  $J = 8.0$  Hz, 1H), 7.73 (d,  $J = 8.0$  Hz, 1H), 7.66 (s, 1H), 7.53 – 7.39 (m, 4H), 7.39 – 7.31 (m, 2H), 7.31 (d,  $J = 5.6$  Hz, 2H), 3.46 (s, 3H).  $^{13}C$  NMR (101 MHz,  $CDCl_3$ )  $\delta$  153.6, 150.9, 148.4, 144.0, 134.3, 131.6, 129.1, 129.0, 129.0, 128.7, 128.4, 128.4, 128.3, 128.1, 116.2, 107.4, 94.3, 55.8. HR-MS (ESI): calculated for  $C_{22}H_{16}BrN_3O_3Na$  ( $[M+Na]^+$ ): 472.0267, 474.0248 observed : 472.0281, 474.0263.

#### Synthesis of 1-(2-methoxy-4-nitrophenyl)-3,4,5-triphenyl-1H-pyrazole (2d)

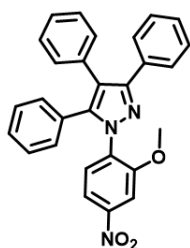

Compound **2d** was prepared following a procedure similar to that used for **1b**. The quantities involved are as follows: 4-Bromo-1-(2-methoxy-4-nitrophenyl)-3,5-diphenyl-1H-pyrazole (**2e**) (9.30 g, 20.52 mmol, 1.0 eq), palladium tetrakis(triphenylphosphine) (0.60 g, 0.51 mmol, 0.025 eq), phenylboronic acid (3.30 g, 26.67 mmol) and sodium carbonate (6.50 g, 61.54 mmol, 3.0 eq). The product (**2d**) was purified using silica gel column chromatography (*n*-hexane/EtOAc/ $CH_2Cl_2$  (80:10:10)). Yield: 7.00 g (76.0%).  $^1H$  NMR (400 MHz,  $CDCl_3$ )  $\delta$  7.96 (d,  $J = 8.0$  Hz, 1H), 7.78 (d,  $J = 8.0$  Hz, 1H), 7.68 (s, 1H), 7.55 – 7.46 (m, 2H), 7.33 – 7.27 (m, 3H), 7.27 – 7.08 (m, 8H), 7.04 – 6.96 (m, 2H), 3.46 (s, 3H).  $^{13}C$  NMR (101 MHz,  $CDCl_3$ )  $\delta$  154.0, 151.0, 148.4, 143.5, 136.3, 134.4, 132.6, 132.5, 130.8, 130.0, 129.6, 129.2, 128.6, 128.4, 128.4, 128.2, 127.0, 120.1, 119.0, 116.3, 107.4, 55.9. HR-MS (ESI): calculated for  $C_{28}H_{22}N_3O_3$  ( $[M+H]^+$ ): 448.1661, observed : 448.1631.

#### Synthesis of 4-(3,4,5-triphenyl-1H-pyrazol-1-yl)-3-methoxyaniline (2c)

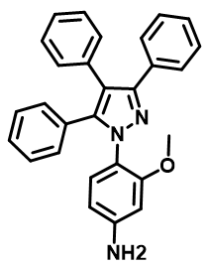

A mixture of 1-(2-methoxy-4-nitrophenyl)-3,4,5-triphenyl-1H-pyrazole (**2d**) (5.60 g, 12.6 mmol, 1.0 eq), hydrazine hydrate (6.2 mL, 126.00 mmol, 10.0 eq), Pd/C (0.13 g, 1.26 mmol, 0.1 eq) and ethanol (120 mL) was refluxed for 12h. After completion of the reaction, the reaction mixture was passed through a column of celite and was extracted using water and ethyl acetate (3 x 150 mL). The extracted organic phase was washed with brine and then dried over anhydrous sodium sulphate. The solvent was concentrated and the product (**2c**) was purified using silica gel column chromatography (*n*-hexane/EtOAc (70:30)). Crystallisation was done using  $CH_2Cl_2/n$ -hexane. Yield: 5.30 g (98.0%).  $^1H$  NMR (400 MHz,  $CDCl_3$ )  $\delta$  7.52 – 7.44 (m, 2H), 7.30 – 7.17 (m, 7H), 7.16 – 7.07 (m, 5H), 7.07 – 6.99 (m, 2H), 6.46 (d,  $J = 8.0$  Hz, 1H), 6.32 (s, 1H), 4.37 (s, 2H), 3.37 (s, 3H).  $^{13}C$  NMR (101 MHz,  $CDCl_3$ )  $\delta$  155.2, 149.6, 148.1, 143.3, 133.7, 133.6, 130.8, 130.7, 130.0, 129.7, 128.6, 128.2, 128.1, 127.8, 127.6, 127.4, 126.4, 120.5, 118.8, 107.1, 99.0, 55.2. HR-MS (ESI): calculated for  $C_{28}H_{24}N_3O$  ( $[M+H]^+$ ): 418.1914, observed : 418.1931.

### Synthesis of 3-methoxy-*N,N*-dimethyl-4-(3,4,5-triphenyl-1*H*-pyrazol-1-yl)aniline (**2b**):

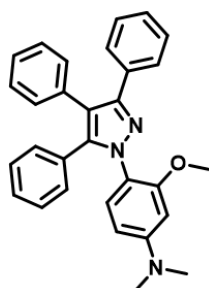

A mixture of 3-methoxy-4-(3,4,5-triphenyl-1*H*-pyrazol-1-yl)aniline (**2c**) (1.90 g, 4.56 mmol, 1.0 eq), sodium cyanoborohydride (1.40 g, 21.96 mmol, 5.0 eq), 37% formaldehyde solution (5.6 mL, 68.43 mmol, 15.0 eq) and acetic acid (0.52 mL, 9.12 mmol, 2.0 eq) was taken in acetonitrile (60 mL). The reaction mixture was stirred at room temperature for 6h. The reaction mixture was extracted using water and dichloromethane (3 x 100 mL). The extracted organic phase was washed with brine and then dried over anhydrous sodium sulphate. The solvent was concentrated and the product (**2b**) was purified using silica gel column chromatography (*n*-hexane/EtOAc/CH<sub>2</sub>Cl<sub>2</sub> (80:10:10)). Crystallisation was done using CH<sub>2</sub>Cl<sub>2</sub>/Ethanol. Yield: 1.96 g (97 %). <sup>1</sup>H NMR (400 MHz, CDCl<sub>3</sub>) δ = 7.56 – 7.49 (m, 2H), 7.31 (d, *J* = 8.7 Hz, 1H), 7.28 – 7.18 (m, 6H), 7.17 – 7.10 (m, 5H), 7.08 – 7.02 (m, 2H), 6.31 (d, *J* = 8.0 Hz, 1H), 6.07 (d, *J* = 2.6 Hz, 1H), 3.43 (s, 3H), 2.96 (s, 6H). <sup>13</sup>C NMR (101 MHz, CDCl<sub>3</sub>) δ = 154.9, 152.0, 149.5, 143.2, 133.8, 133.7, 130.9, 129.7, 129.5, 128.6, 128.2, 128.1, 127.7, 127.5, 127.3, 126.4, 118.7, 118.7, 104.5, 96.1, 55.2, 40.7. HR-MS (ESI): calculated for C<sub>30</sub>H<sub>28</sub>N<sub>3</sub>O ([M+H]<sup>+</sup>): 446.2227, observed : 446.2252.

### Synthesis of 5-(dimethylamino)-2-(3,4,5-triphenyl-1*H*-pyrazol-1-yl)phenol (**2a**):

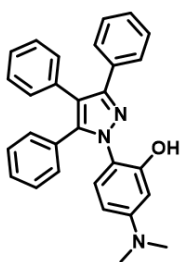

Compound **2a** was prepared following a procedure similar to that used for **1a**. The quantities involved are as follows: 3-Methoxy-*N,N*-dimethyl-4-(3,4,5-triphenyl-1*H*-pyrazol-1-yl)aniline (**2b**) (1.60 g, 3.59 mmol, 1.0 eq) and BBr<sub>3</sub> (1.7 mL, 17.91 mmol, 5.0 eq) The product (**2a**) was purified using silica gel column chromatography (*n*-hexane/EtOAc/CH<sub>2</sub>Cl<sub>2</sub> (80:10:10)). Crystallisation was done using CH<sub>2</sub>Cl<sub>2</sub>/EtOH. Yield: 0.80 g (52 %), <sup>1</sup>H NMR (400 MHz, CDCl<sub>3</sub>) δ = 9.56 (s, 1H), 7.53 – 7.47 (m, 2H), 7.34 – 7.18 (m, 9H), 7.16 – 7.04 (m, 4H), 6.50 – 6.39 (m, 2H), 5.97 – 5.91 (m, 1H), 2.92 (s, 6H). <sup>13</sup>C NMR (101 MHz, CDCl<sub>3</sub>) δ = 151.6, 150.6, 149.2, 141.5, 132.8, 132.6, 130.8, 130.5, 129.9, 128.5(2C), 128.4, 128.3 (2C), 128.0, 126.9, 125.0, 120.1, 115.7, 103.5, 101.2, 40.4. HR-MS (ESI): calculated for C<sub>29</sub>H<sub>26</sub>N<sub>3</sub>O ([M+H]<sup>+</sup>): 432.2070, observed : 432.2076.

### Synthesis of complex **2**: Compound **2** was prepared following a procedure similar to that used for **1**.

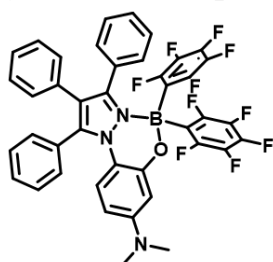

The quantities involved are as follows: 5-(Dimethylamino)-2-(3,4,5-triphenyl-1*H*-pyrazol-1-yl)phenol (**2a**) (0.25 g, 0.58 mmol, 1.0 eq) and tris(pentafluorophenyl)borane (0.32 g, 0.62 mmol, 1.2 eq). Crystallisation was done using CH<sub>2</sub>Cl<sub>2</sub>/*n*-hexane. Yield: 0.29 g (64 %). <sup>1</sup>H NMR (400 MHz, CDCl<sub>3</sub>) δ 7.52 – 7.39 (m, 3H), 7.31 (d, *J* = 6.9 Hz, 2H), 7.22 – 6.98 (m, 8H), 6.83 – 6.75 (m, 2H), 6.38 – 6.32 (m, 1H), 6.29 (d, *J* = 4.0 Hz, 1H), 5.85 (dd, *J* = 8.0, 4.0 Hz, 1H), 2.87 (s, 6H). <sup>13</sup>C NMR (176 MHz, CDCl<sub>3</sub>) δ 151.1, 148.1 (d, *J* = 241.12 Hz) 146.4, 140.1 (d, *J* = 251.68 Hz), 139.8, 138.0, 136.8 (d, *J* = 248.16 Hz), 130.5, 130.4, 130.2, 129.6, 129.4, 129.1, 128.6, 128.3, 128.2, 128.0, 127.9, 127.6, 125.4, 122.9, 121.3, 114.6, 103.8, 102.4, 96.2, 40.2. <sup>19</sup>F NMR (376 MHz, CDCl<sub>3</sub>) δ -132.82 (bs, 4F, Pf), -156.74 (t, 2F, Pf), -164.30 (s, 4F, Pf). <sup>11</sup>B NMR (128 MHz, CDCl<sub>3</sub>) δ -0.85. HR-MS (ESI): calculated for C<sub>41</sub>H<sub>25</sub>BF<sub>10</sub>N<sub>3</sub>O ([M+H]<sup>+</sup>): 776.1967, observed : 776.2048. Anal. Calcd for C<sub>41</sub>H<sub>24</sub>BF<sub>10</sub>N<sub>3</sub>O.0.2(C<sub>6</sub>H<sub>14</sub>): C, 63.94; H, 3.41, N, 5.30. Found: C, 64.50; H, 3.15, N, 5.76.

### Synthesis of 3-methoxy-*N,N*-diphenyl-4-(3,4,5-triphenyl-1*H*-pyrazol-1-yl)aniline (**3b**):

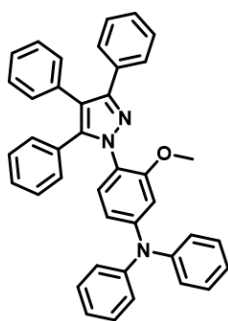

A mixture of 4-(3,4,5-triphenyl-1*H*-pyrazol-1-yl)-3-methoxyaniline (**2c**) (5.20 g, 12.47 mmol, 1.0 eq), iodobenzene (4.2 mL, 37.27 mmol, 3.0 eq), copper iodide (0.14 g, 0.74 mmol, 0.06 eq), 1,10-phenanthroline (0.15 g, 0.84 mmol, 0.07 eq), potassium *tert*-butoxide (4.20 g, 37.27 mmol, 3.0 eq) was taken in a round bottom flask with degassed dry toluene (100 mL). The reaction mixture was refluxed for 36 h. After completion of the reaction, the reaction mixture was passed through a column of celite, the resultant solution was extracted using water and dichloromethane (3 x 100 mL). The extracted organic phase was washed with brine and dried over anhydrous sodium sulphate. The solvent was concentrated and the product (**3b**) was purified using silica gel column chromatography (*n*-hexane/EtOAc/CH<sub>2</sub>Cl<sub>2</sub> (80:10:10)). Crystallisation was done using CH<sub>2</sub>Cl<sub>2</sub>/Ethanol. Yield: 5.60 g, (79 %). <sup>1</sup>H NMR (400 MHz, CDCl<sub>3</sub>) δ = 7.58 – 7.50 (m, 2H), 7.37 – 7.32 (m, 1H), 7.30 – 7.11 (m, 15H), 7.12 – 6.99 (m, 8H), 6.69 – 6.62 (m, 1H), 6.54 – 6.50 (m, 1H), 3.24 (s, 3H). <sup>13</sup>C NMR (101 MHz, CDCl<sub>3</sub>): δ = 154.8, 149.9, 149.5, 147.4, 143.2, 133.5, 133.5, 130.8, 130.7, 129.7, 129.7, 129.4, 128.6, 128.2, 128.1, 127.8, 127.7, 127.4, 126.5, 124.8, 123.5, 123.4, 118.9, 115.5, 107.0, 55.3. HR-MS (ESI): calculated for C<sub>40</sub>H<sub>32</sub>N<sub>3</sub>O ([M+H]<sup>+</sup>): 570.2540, observed : 570.2564.

### Synthesis of 5-(diphenylamino)-2-(3,4,5-triphenyl-1*H*-pyrazol-1-yl)phenol (**3a**):

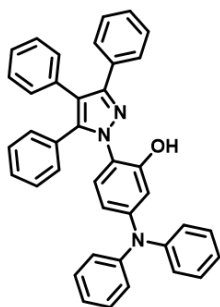

Compound **3a** was prepared following a procedure similar to that used for **1a**. The quantities involved are as follows: 3-Methoxy-*N,N*-diphenyl-4-(3,4,5-triphenyl-1*H*-pyrazol-1-yl)aniline (**3b**) (3.50 g, 6.13 mmol, 1.0 eq) and BBr<sub>3</sub> (2.9 mL, 30.67 mmol, 5.0 eq) The product (**3a**) was purified using silica gel column chromatography (*n*-hexane/EtOAc/CH<sub>2</sub>Cl<sub>2</sub> (80:10:10)). Crystallisation was done using CH<sub>2</sub>Cl<sub>2</sub>/EtOH. Yield: 2.60 g, (76.5 %). <sup>1</sup>H NMR (400 MHz, CDCl<sub>3</sub>): δ = 9.72 (s, 1H), 7.57 – 7.46 (m, 2H), 7.35 – 7.25 (m, 13H), 7.21 – 7.02 (m, 10H), 6.83 (d, *J* = 4.0 Hz, 1H), 6.46 – 6.40 (m, 1H), 6.29 (dd, *J* = 8.0, 4.0 Hz, 1H). <sup>13</sup>C NMR (101 MHz, CDCl<sub>3</sub>): δ = 151.4, 149.5, 147.8, 147.3, 141.8, 132.5, 132.3, 130.8, 130.4, 129.7, 129.4, 128.7, 128.6, 128.44 (2C), 128.41, 128.2, 127.0, 125.1, 124.7, 123.5, 120.5, 119.8, 113.4, 111.8. HR-MS (ESI): calculated for C<sub>39</sub>H<sub>30</sub>N<sub>3</sub>O ([M+H]<sup>+</sup>): 556.2389, observed : 556.2344.

### Synthesis of complex **3**: Compound **3** was prepared following a procedure similar to that used

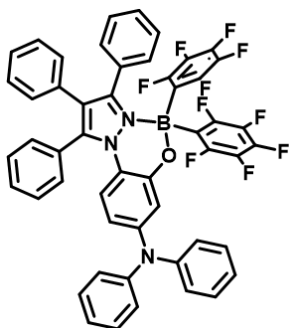

for **1**. The quantities involved are as follows: 5-(Diphenylamino)-2-(3,4,5-triphenyl-1*H*-pyrazol-1-yl)phenol (**3a**) (0.25 g, 0.45 mmol, 1.0eq) and tri(pentafluorophenyl)borane (0.23 g, 0.54 mmol, 1.2 eq). Crystallisation was done using CH<sub>2</sub>Cl<sub>2</sub>/*n*-hexane. Yield: 0.32 g (80 %). <sup>1</sup>H NMR (400 MHz, CDCl<sub>3</sub>) δ = 7.49 – 7.39 (m, 3H), 7.38 – 7.32 (m, 2H), 7.28 – 7.21 (m, 5H), 7.08 - 7.03 (m, 9H), 6.98 (d, *J* = 8.0 Hz, 4H), 6.81 (d, *J* = 8.0 Hz, 2H), 6.65 (d, *J* = 4.0 Hz, 1H), 6.34 – 6.29 (m, 1H), 6.17 (dd, *J* = 8.0, 4.0 Hz, 1H). <sup>13</sup>C NMR (176 MHz, CDCl<sub>3</sub>) δ = 151.0, 148.8, 148.2 (d, *J* = 281.6 Hz) 147.0, 146.6, 140.6, 140.1 (d, *J* = 248.16 Hz) 136.8 (d, *J* = 248.16 Hz) 130.5, 130.5, 130.3, 129.5, 129.5, 129.5, 128.8, 128.3, 128.1, 127.7, 127.6, 125.5, 124.1, 123.3, 121.0, 118.6, 112.8, 112.4. <sup>19</sup>F NMR (376 MHz, CDCl<sub>3</sub>) δ = -132.94 (bs, 4F, Pf), -156.55 (t, 2F, Pf), -164.14 (bs, 4F, Pf). <sup>11</sup>B NMR (128 MHz, CDCl<sub>3</sub>) δ = -1.02. HR-MS (ESI): calculated for C<sub>51</sub>H<sub>29</sub>BF<sub>10</sub>N<sub>3</sub>O ([M+H]<sup>+</sup>): 900.2280, observed

: 900.2245. Anal. Calcd for  $C_{51}H_{28}BF_{10}N_3O$ : C, 68.09; H, 3.14, N, 4.67. Found: C, 67.89; H, 3.74, N, 4.62.

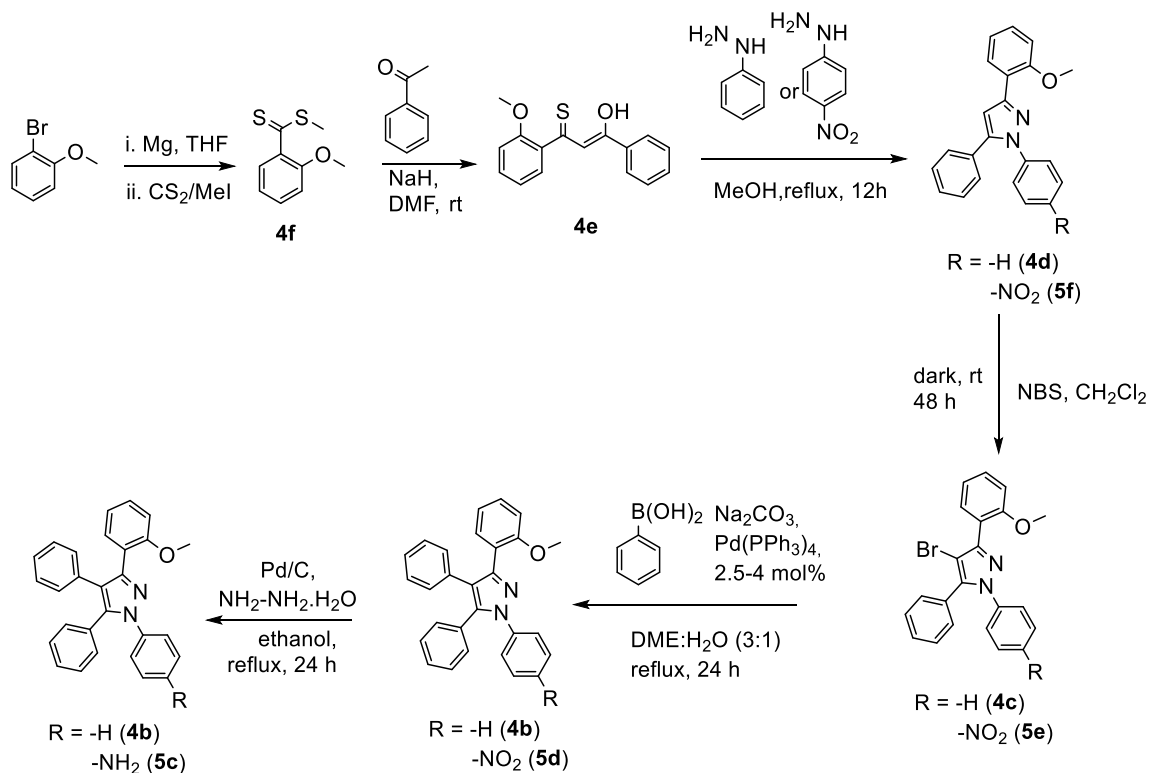

### Synthesis of methyl 2-methoxybenzodithiolate (**4f**)

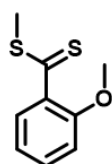

Activated magnesium turnings (0.84 g, 34.70 mmol, 1.3 eq) were added to 60 mL of dry THF under  $N_2$  atmosphere to a two neck RB and the solution was warmed till brisk effervescence was observed. After activation of Mg, the solution was immersed in an ice-cooled water bath and 2-bromoanisole (5.00 g, 3.33 mL, 26.69 mmol, 1.0 eq) was added dropwise. The solution was stirred for about 2h at room temperature;  $CS_2$  (2.23 g, 1.77mL, 29.36 mmol, 1.1 eq) was added dropwise to the reaction mixture at 0 °C. Then the reaction mixture was stirred at room temperature for another 2h after which methyl iodide (4.16 g, 1.83 mL, 29.36 mmol, 1.1 eq) was added dropwise to it at 0 °C. The reaction mixture was allowed to stir at rt, overnight. After completion of the reaction, it was quenched with ice-cold water. The reaction mixture was extracted using water and ethyl acetate (3 x 100 mL). The extracted organic phase was washed with brine and dried over anhydrous sodium sulphate. The solvent was concentrated under reduced pressure and the product was purified using silica gel column chromatography (*n*-hexane/EtOAc (99.5:0.5)). Yield: 4.79 g (90.0%).  $^1H$  NMR (400 MHz, )  $\delta$  7.40 (dd,  $J = 8.0$  Hz, 2.0 Hz 1H), 7.36 (dd,  $J = 8.0$  Hz, 2.0 Hz, 1H), 7.00 – 6.92 (m, 2H), 3.85 (s, 3H), 2.76 (s, 3H).  $^{13}C$  NMR (101 MHz,  $CDCl_3$ )  $\delta$  229.7, 154.8, 136.6, 131.3, 129.0, 120.5, 111.9, 56.1, 21.1. HR-MS (ESI): calculated for  $C_9H_{10}OS_2K$  ( $[M + K]^+$ ): 236.9810, observed : 237.0095.



### Synthesis of 3-(2-methoxyphenyl)-1-phenyl-3-thioxopropan-1-one (4e)

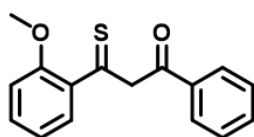

The compound **(4e)** has been synthesized following a procedure reported in literature.<sup>1</sup> To a stirred suspension of NaH (1.28 g, 26.8 mmol, 1.2 eq) in DMF (50 mL) under N<sub>2</sub> atmosphere was added a solution of acetophenone (2.68 g, 2.61 mL, 22.33 mmol, 1.0 eq) and methyl 2-methoxybenzodithioate (**4f**) (5.00 g, 26.8 mmol, 1.2 eq) in DMF (30 mL) at 0 °C, dropwise. The reaction mixture was further stirred at room temperature for about 5 h (monitored by TLC) and was poured into ice-cold water (100 mL) and acidified with acetic acid. The product **(4e)** was extracted using water and EtOAc (3 x 150 mL). The extracted organic phase was washed with brine and dried over anhydrous sodium sulphate. The solvent was concentrated under reduced pressure to give crude product 3-(2-methoxyphenyl)-1-phenyl-3-thioxopropan-1-one, (**4e**) which was used for the next reaction without purification.

### Synthesis of 3-(2-methoxyphenyl)-1,5-diphenyl-1H-pyrazole (4d)

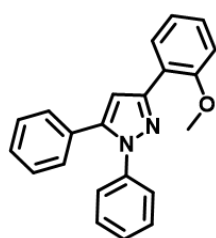

A mixture of 3-(2-methoxyphenyl)-1-phenyl-3-thioxopropan-1-one, (**4e**) (5.00 g 18.45 mmol, 1.0 eq), phenylhydrazine (2.20 g, 20.34 mmol, 1.1 eq) in ethanol (45 mL) was refluxed for 12h. The reaction mixture was extracted using water and dichloromethane (3 x 150 mL). The extracted organic phase was washed with brine and dried over anhydrous sodium sulphate. The solvent was concentrated under reduced pressure and the product **(4d)** was purified using silica gel column chromatography (*n*-hexane/EtOAc (96:4)). Yield: 3.32 g (40%). <sup>1</sup>H NMR (400 MHz, CDCl<sub>3</sub>) δ 8.11 (dd, *J* = 7.7, 1.7 Hz, 1H), 7.41 – 7.28 (m, 11H), 7.09 (s, 1H), 7.07 – 7.00 (m, 2H), 3.95 (s, 3H). <sup>13</sup>C NMR (101 MHz, CDCl<sub>3</sub>) δ 157.0, 149.0, 143.4, 140.4, 131.0, 129.2, 129.0, 128.9 (2C), 128.5, 128.1, 127.3, 125.4, 122.1, 121.0, 111.3, 109.4, 55.6. HR-MS (ESI): calculated for C<sub>22</sub>H<sub>19</sub>N<sub>2</sub>O ([M + H]<sup>+</sup>): 327.1492, observed : 327.1494.

### Synthesis of 4-Bromo-3-(2-methoxyphenyl)-1,5-diphenyl-1H-pyrazole (4c)

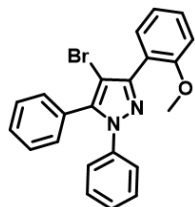

Compound **4c** was prepared following a procedure similar to that used for **1c**. The quantities involved are as follows: 3-(2-Methoxyphenyl)-1,5-diphenyl-1H-pyrazole (**4d**) (2.00 g, 6.12 mmol, 1.0 eq) and N-bromosuccinimide (1.31 g, 7.35 mmol, 1.2 eq). The product was purified using silica gel column chromatography (*n*-hexane/EtOAc (94:6)). Yield: 1.31 g (53.0%). <sup>1</sup>H NMR (400 MHz, CDCl<sub>3</sub>) δ 7.54 (d, *J* = 8.0 Hz, 1H), 7.45 – 7.23 (m, 11H), 7.12 – 7.00 (m, 2H), 3.90 (s, 3H). <sup>13</sup>C NMR (101 MHz, CDCl<sub>3</sub>) δ 157.7, 149.5, 141.0, 140.0, 131.9, 130.4, 130.3, 129.3, 128.9, 128.8, 128.5, 127.4, 124.9, 121.1, 120.6, 111.3, 97.8, 55.7. HR-MS (ESI): calculated for C<sub>22</sub>H<sub>18</sub>BrN<sub>2</sub>O ([M+H]<sup>+</sup>): 405.0597, 407.0578 observed : 405.0574, 407.0558.

### Synthesis of 3-(2-methoxyphenyl)-1,4,5-triphenyl-1H-pyrazole (4b):

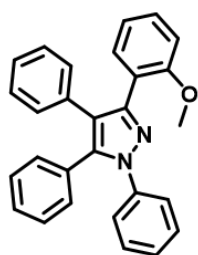

Compound **4b** was prepared following a procedure similar to that used for **1b**. The quantities involved are as follows: 4-Bromo-3-(2-methoxyphenyl)-1,5-diphenyl-1H-pyrazole (**4c**) (1.67 g, 4.12 mmol, 1.0 eq), Pd(PPh<sub>3</sub>)<sub>4</sub> (0.14 g, 0.12 mmol, 0.03 eq), phenylboronic acid (0.586 g, 4.81 mmol, 1.2 eq), and sodium carbonate (1.31 g, 12.40 mmol, 3.0 eq). The product (**4b**) was purified using silica gel column chromatography (*n*-hexane/EtOAc (96:4)). Yield: 1.34 g (90 %). <sup>1</sup>H NMR (400 MHz, CDCl<sub>3</sub>) δ 7.53 (d, *J* = 8.0 Hz, 1H), 7.33 – 7.11 (m, 9H), 7.11 – 6.99 (m, 5H),

6.95 (t,  $J = 8.0$  Hz, 1H), 6.89 – 6.84 (m, 2H), 6.72 (d,  $J = 8.0$  Hz, 1H), 3.16 (s, 3H).  $^{13}\text{C}$  NMR (101 MHz,  $\text{CDCl}_3$ )  $\delta$  157.0, 148.9, 140.1, 134.3, 131.8, 130.7, 130.4, 129.7, 129.2, 129.1, 128.7, 128.4, 128.2, 127.8, 127.1, 125.9, 125.5, 122.8, 122.0, 120.8, 111.2, 54.8. HR-MS (ESI): calculated for  $\text{C}_{28}\text{H}_{22}\text{N}_2\text{ONa}$  ( $[\text{M} + \text{Na}]^+$ ): 425.1630, observed : 425.1639.

#### Synthesis of 2-(1,4,5-triphenyl-1H-pyrazol-3-yl)phenol (**4a**):

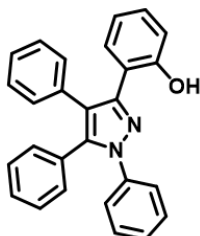

Compound **4a** was prepared following a procedure similar to that used for **1a**. The quantities involved are as follows: 3-(2-Methoxyphenyl)-1,4,5-triphenyl-1H-pyrazole (**4b**) (1.50 g, 3.73 mmol, 1.0 eq) and  $\text{BBr}_3$  (1.41 mL, 14.92 mmol, 4.0 eq). The product (**4a**) was purified using silica gel column chromatography (*n*-hexane/EtOAc (94:06)). Yield: 1.00 g (69 %).  $^1\text{H}$  NMR (400 MHz,  $\text{CDCl}_3$ )  $\delta$  = 10.87 (s, 1H), 7.30 – 7.20 (m, 8H), 7.10 – 7.06 (m, 6H), 7.00 – 6.93 (m, 4H), 6.53 (t,  $J = 7.6$  Hz, 1H).  $^{13}\text{C}$  NMR (101 MHz,  $\text{CDCl}_3$ )  $\delta$  = 156.5, 148.3, 141.8, 139.3, 133.1, 131.1, 130.4, 129.3, 129.3, 129.0, 128.6, 128.6, 128.4, 128.3, 127.6, 127.4, 124.9, 121.1, 118.8, 117.2, 116.6. HR-MS (ESI): calculated for  $\text{C}_{27}\text{H}_{21}\text{N}_2\text{O}$  ( $[\text{M} + \text{H}]^+$ ): 389.1648, observed : 389.1641

#### Synthesis of complex **4**: Compound **4** was prepared following a procedure similar to that used

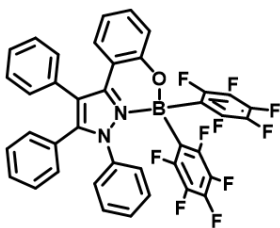

for **1**. The quantities involved are as follows: 2-(1,4,5-Triphenyl-1H-pyrazol-3-yl)phenol (**4a**) (0.25 g, 0.64 mmol, 1.0 eq) and tri(pentafluorophenyl)borane (0.40 g, 0.77 mmol, 1.2 eq). Crystallisation was done using  $\text{CH}_2\text{Cl}_2$ /*n*-hexane. Yield: 0.25 g (54 %).  $^1\text{H}$  NMR (400 MHz,  $\text{CDCl}_3$ )  $\delta$  = 7.39 (m, 3H), 7.36 – 7.29 (m, 2H), 7.24 – 7.15 (m, 3H), 7.11 (m, 6H), 6.99 (m, 4H), 6.62 (t,  $J = 8.3$ , 1H).  $^{13}\text{C}$  NMR (101 MHz,  $\text{CDCl}_3$ )  $\delta$  = 155.5, 148.1 (d,  $J = 243.41$  Hz) 147.2, 142.8, 140.1 (d,  $J = 252.5$  Hz) 136.9 (d,  $J = 247.45$  Hz) 134.8, 132.5, 130.9, 130.7, 130.4, 130.2, 129.8, 129.2, 129.0, 128.7, 128.5, 126.7, 126.2, 119.0, 115.1.  $^{19}\text{F}$  NMR (376 MHz,  $\text{CDCl}_3$ )  $\delta$  = -134.34 (bs, 4F, Pf), -156.65 (t, 2F, Pf), -163.94 (bs, 4F, Pf).  $^{11}\text{B}$  NMR (128 MHz,  $\text{CDCl}_3$ )  $\delta$  = -0.60. HR-MS (ESI): calculated for  $\text{C}_{39}\text{H}_{20}\text{BF}_{10}\text{N}_2\text{O}$  ( $[\text{M} + \text{H}]^+$ ): 733.1545, observed : 733.1526. Anal. Calcd for  $\text{C}_{39}\text{H}_{19}\text{BF}_{10}\text{N}_2\text{O} \cdot 0.2(\text{C}_6\text{H}_{14})$ : C, 64.41; H, 2.93, N, 3.74. Found: C, 64.79; H, 2.51, N, 4.20.

#### Synthesis of 3-(2-methoxyphenyl)-1-(4-nitrophenyl)-5-phenyl-1H-pyrazole (**5f**)

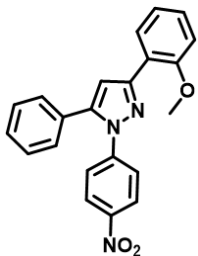

Compound **5f** was prepared following a procedure similar to that used for **4d**. The quantities involved are as follows: 3-(2-methoxyphenyl)-1-phenyl-3-thioxopropan-1-one, (**4e**) (5.00 g, 14.37 mmol, 1.0 eq), and 4-nitrophenylhydrazine (2.20 g, 18.51 mmol, 1.3 eq). The product (**5f**) was purified using silica gel column chromatography (*n*-hexane/EtOAc (96:4)). Yield: 3.32 g (62%).  $^1\text{H}$  NMR (400 MHz,  $\text{CDCl}_3$ )  $\delta$  8.18 (d,  $J = 8.0$  Hz, 2H), 8.09 (d,  $J = 8.0$  Hz, 1H), 7.55 (d,  $J = 8.0$  Hz, 2H), 7.43 – 7.36 (m, 4H), 7.34 – 7.30 (m, 2H), 7.12 – 7.00 (m, 3H), 3.95 (s, 3H).  $^{13}\text{C}$  NMR (101 MHz,  $\text{CDCl}_3$ )  $\delta$  157.2, 150.6, 145.8, 145.0, 144.0, 130.4, 129.9, 129.07 (2C), 129.01 (2C), 124.6, 124.5, 121.1, 121.1, 111.4, 111.4, 55.6. HR-MS (ESI): calculated for  $\text{C}_{27}\text{H}_{17}\text{N}_3\text{O}_3\text{Na}$  ( $[\text{M} + \text{Na}]^+$ ): 394.1168, observed : 394.1163.

### Synthesis of 4-bromo-3-(2-methoxyphenyl)-1-(4-nitrophenyl)-5-phenyl-1H-pyrazole (**5e**)

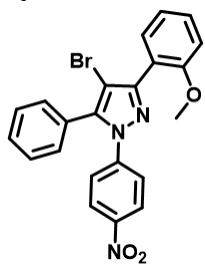

Compound **5e** was prepared following a procedure similar to that used for **1c**. The quantities involved are as follows: 3-(2-Methoxyphenyl)-1-(4-nitrophenyl)-5-phenyl-1H-pyrazole (**5f**) (2.30 g, 6.12 mmol, 1.0 eq) and N-bromosuccinimide (1.31 g, 7.35 mmol, 1.2 eq). The product (**5e**) was purified using silica gel column chromatography (*n*-hexane/EtOAc (94:6)). Yield: 2.28 g (83%). <sup>1</sup>H NMR (400 MHz, CDCl<sub>3</sub>) δ 8.17 – 8.11 (m, 2H), 7.51 (dd, 8.0 Hz, 2.0 Hz 1H), 7.49 – 7.44 (m, 6H), 7.41 – 7.37 (m, 2H), 7.12 – 7.01 (m, 2H), 3.91 (s, 3H). <sup>13</sup>C NMR (101 MHz, CDCl<sub>3</sub>) δ 157.6, 151.2, 146.0, 144.6, 141.5, 131.7, 130.9, 130.2, 129.7, 129.1, 128.7, 124.5, 124.2, 120.7, 120.4, 111.4, 100.2, 55.7. HR-MS (ESI): calculated for C<sub>22</sub>H<sub>16</sub>BrN<sub>3</sub>O<sub>3</sub>Na ([M+Na]<sup>+</sup>): 472.0267, 474.0248 observed : 472.0281, 474.0263.

### Synthesis of 3-(2-methoxyphenyl)-1-(4-nitrophenyl)-4,5-diphenyl-1H-pyrazole (**5d**)

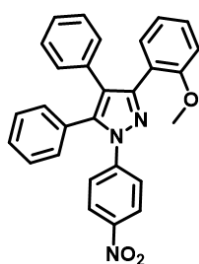

Compound **5d** was prepared following a procedure similar to that used for **1b**. The quantities involved are as follows: 4-bromo-3-(2-methoxyphenyl)-1-(4-nitrophenyl)-5-phenyl-1H-pyrazole (**5e**) (1.55 g, 3.70 mmol, 1.0 eq), Pd(PPh<sub>3</sub>)<sub>4</sub> (0.13 g, 0.11 mmol, 0.035 eq), phenylboronic acid (0.58 g, 4.81 mmol, 1.3 eq), Sodium carbonate (1.17 g, 11.10 mmol, 3.0 eq). The product (**5d**) was purified using silica gel column chromatography (*n*-hexane/EtOAc (96:4)). Yield: 1.52 g (92%). <sup>1</sup>H NMR (400 MHz, CDCl<sub>3</sub>) δ 8.14 (d, *J* = 8.0 Hz, 2H), 7.57 (d, *J* = 8.0 Hz, 1H), 7.48 (d, *J* = 8.0 Hz, 2H), 7.42 – 7.26 (m, 4H), 7.17 (d, *J* = 8.0 Hz, 2H), 7.15 – 7.08 (m, 3H), 7.05 (t, *J* = 7.4 Hz, 1H), 6.97 – 6.89 (m, 2H), 6.81 (d, *J* = 8.0 Hz, 1H), 3.25 (s, 3H). <sup>13</sup>C NMR (101 MHz, CDCl<sub>3</sub>) δ 157.0, 150.7, 145.7, 144.9, 140.4, 133.2, 131.5, 130.6, 130.2, 129.8, 129.1, 129.0, 129.0, 127.9, 126.4, 124.7, 124.4, 121.9, 120.9, 115.4, 111.3, 54.9. HR-MS (ESI): calculated for C<sub>28</sub>H<sub>22</sub>N<sub>3</sub>O<sub>3</sub> ([M+H]<sup>+</sup>): 448.1661, observed : 448.1631.

### Synthesis of 4-(3-(2-methoxyphenyl)-4,5-diphenyl-1H-pyrazol-1-yl)aniline (**5c**)

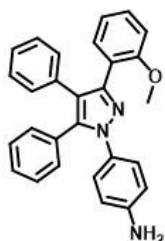

Compound **5c** was prepared following a procedure similar to that used for **2c**. The quantities involved are as follows: 3-(2-Methoxyphenyl)-1-(4-nitrophenyl)-4,5-diphenyl-1H-pyrazole (**5d**) (5.60 g, 12.6 mmol, 1.0 eq), hydrazine hydrate (6.2 mL, 126.00 mmol, 10.0 eq), and Pd/C (0.13 g, 1.26 mmol, 0.1 eq). The product (**5c**) was purified using silica gel column chromatography (*n*-hexane/EtOAc (70:30)). Yield: 5.05 g (96%). <sup>1</sup>H NMR (400 MHz, CDCl<sub>3</sub>) δ 7.57 (d, *J* = 8.0 Hz, 1H), 7.31 (td, *J* = 7.9, 1.8 Hz, 2H), 7.25 – 7.19 (m, 3H), 7.16 – 7.07 (m, 7H), 7.00 (td, *J* = 7.5, 1.1 Hz, 1H), 6.96 – 6.91 (m, 2H), 6.78 (d, *J* = 7.3 Hz, 2H), 3.22 (s, 3H). <sup>13</sup>C NMR (101 MHz, CDCl<sub>3</sub>) δ 157.0, 148.1, 145.6, 139.9, 134.5, 131.8, 131.5, 130.7, 130.5, 129.5, 129.2, 128.2, 127.9, 127.7, 126.8, 125.8, 122.9, 121.2, 120.8, 114.9, 111.1, 54.8. HR-MS (ESI): calculated for C<sub>28</sub>H<sub>24</sub>N<sub>3</sub>O ([M+H]<sup>+</sup>): 418.1914, observed : 418.1931.

### Synthesis of 4-(3-(2-methoxyphenyl)-4,5-diphenyl-1H-pyrazol-1-yl)-N,N-dimethylaniline (**5b**)

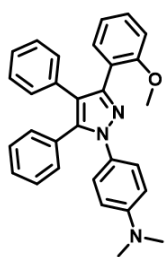

Compound **5b** was prepared following a procedure similar to that used for **2b**. The quantities involved are as follows: 4-(3-(2-Methoxyphenyl)-4,5-diphenyl-1H-pyrazol-1-yl)aniline (**5c**) (1.90 g, 4.56 mmol, 1.0 eq), sodium cyanoborohydride (1.4 g, 21.96 mmol, 4.8 eq), 37% formaldehyde solution (5.6 mL, 68.43 mmol, 15.0 eq) and acetic acid (0.52 mL, 9.12 mmol, 2.0 eq). The product was purified using silica gel column chromatography (*n*-hexane/EtOAc/CH<sub>2</sub>Cl<sub>2</sub> (80:10:10)). Yield: 1.83 g (90 %). <sup>1</sup>H NMR (400 MHz,

CDCl<sub>3</sub>)  $\delta$  7.64 (d,  $J$  = 8.0 Hz, 1H), 7.34 (t,  $J$  = 8.0 Hz, 1H), 7.29 – 7.22 (m, 3H), 7.24 – 7.12 (m, 7H), 7.04 (t,  $J$  = 8.0 Hz, 1H), 7.01 – 6.92 (m, 2H), 6.81 (d,  $J$  = 8.0 Hz, 1H), 6.64 – 6.66 (m, 2H), 3.24 (s, 3H), 2.96 (s, 6H). <sup>13</sup>C NMR (101 MHz, CDCl<sub>3</sub>)  $\delta$  157.0, 149.5, 148.0, 139.9, 134.7, 131.9, 130.8, 130.7, 129.8, 129.4, 129.2, 128.2, 127.8, 127.7, 126.4, 125.7, 123.1, 121.2, 120.8, 112.1, 111.2, 54.8, 40.6. HR-MS (ESI): calculated for C<sub>30</sub>H<sub>28</sub>N<sub>3</sub>O ([M+H]<sup>+</sup>): 446.2227, observed : 446.2252.

#### Synthesis of 2-(1-(4-(dimethylamino)phenyl)-4,5-diphenyl-1H-pyrazol-3-yl)phenol (**5a**):

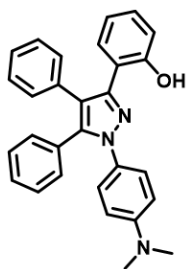

Compound **5a** was prepared following a procedure similar to that used for **1a**. The quantities involved are as follows: Compound **5b** (1.00 g, 2.24 mmol, 1.0 eq) and BBr<sub>3</sub> (1.06 mL, 11.2 mmol, 5.0 eq). The product (**5a**) was purified using silica gel column chromatography (*n*-hexane/EtOAc (94:06)). Crystallisation was done using CH<sub>2</sub>Cl<sub>2</sub>/*n*-hexane. Yield: 0.88 g (92 %). <sup>1</sup>H NMR (400 MHz, CDCl<sub>3</sub>)  $\delta$  = 11.09 (s, 1H), 7.30 – 7.29 (m, 3H), 7.22 – 7.12 (m, 8H), 7.06 – 7.03 (m, 4H), 6.65 – 6.55 (m, 3H), 2.97 (s, 6H). <sup>13</sup>C NMR (101 MHz, CDCl<sub>3</sub>)  $\delta$  = 156.5, 149.7, 147.4, 141.5, 135.3, 133.5, 131.1, 130.5, 129.6, 129.0, 128.7, 128.6, 128.2, 127.2, 126.0, 120.2, 118.7, 117.4, 117.1, 116.9, 111.9, 40.5. HR-MS (ESI): calculated for C<sub>29</sub>H<sub>26</sub>N<sub>3</sub>O ([M+H]<sup>+</sup>): 432.2070, observed: 432.2076.

#### Synthesis of complex **5**: Compound **5** was prepared following a procedure similar to that used for **1**.

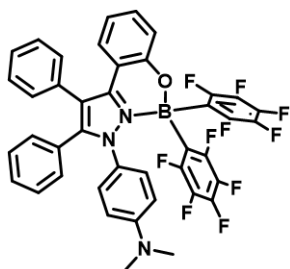

Compound **5** was prepared following a procedure similar to that used for **1**. The quantities involved are as follows: Compound **5a** (0.30 g, 0.69 mmol, 1.0 eq) and tris(pentafluorophenyl)borane (0.39 g, 0.76 mmol, 1.2 eq). Crystallisation was done using CH<sub>2</sub>Cl<sub>2</sub>/*n*-hexane. Yield: 0.34 g (63 %). <sup>1</sup>H NMR (400 MHz, CDCl<sub>3</sub>)  $\delta$  = 7.42 – 7.31 (m, 5H), 7.30 – 7.10 (m, 4H), 7.09 – 7.03 (m, 2H), 7.02 – 6.94 (m, 2H), 6.93 – 6.83 (m, 2H), 6.60 (t,  $J$  = 8.0 Hz, 1H), 6.24 (d,  $J$  = 8.0 Hz, 2H), 2.87 (s, 6H). <sup>13</sup>C NMR (101 MHz, CDCl<sub>3</sub>)  $\delta$  = 155.6, 150.9, 148.1 (d,  $J$  = 245.43 Hz), 147.3, 142.3, 142.2 (d,  $J$  = 233.31), 137.0 (d,  $J$  = 250.48), 132.2, 131.0, 130.7, 130.5, 129.5, 129.1, 128.5, 128.4, 126.7, 126.6, 123.1, 119.7, 118.7, 115.3, 111.4, 40.3. <sup>19</sup>F NMR (376 MHz, CDCl<sub>3</sub>)  $\delta$  = -132.53 (bs, 4F, Pf), -157.63 (t, 2F, Pf), -164.42 (s, 4F, Pf). <sup>11</sup>B NMR (128 MHz, CDCl<sub>3</sub>)  $\delta$  = -0.77. HR-MS (ESI): calculated for C<sub>41</sub>H<sub>25</sub>BF<sub>10</sub>N<sub>3</sub>O ([M+H]<sup>+</sup>): 776.1967, observed : 776.2001. Anal. Calcd for C<sub>41</sub>H<sub>24</sub>BF<sub>10</sub>N<sub>3</sub>O: C, 63.50; H, 3.12, N, 5.42. Found: C, 64.02; H, 3.27, N, 5.82.

#### Synthesis of 4-(3-(2-methoxyphenyl)-4,5-diphenyl-1H-pyrazol-1-yl)-N,N-diphenylaniline (**6b**):

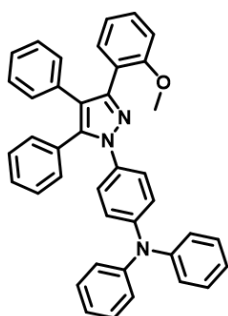

Compound **6b** was prepared following a procedure similar to that used for **3b**. 4-(3-(2-Methoxyphenyl)-4,5-diphenyl-1H-pyrazol-1-yl)aniline (**5c**) (5.20 g, 12.47 mmol, 1.0 eq), iodobenzene (4.20 mL, 37.27 mmol, 3.0 eq), copper iodide (0.14 g, 0.74 mmol, 0.02 eq), 1,10-phenanthroline monohydrate (0.15 g, 0.74 mmol, 0.02 eq), and potassium *tert*-butoxide (4.20 g, 37.27 mmol, 3.0 eq). The product (**6b**) was purified using silica gel column chromatography (*n*-hexane/EtOAc/CH<sub>2</sub>Cl<sub>2</sub> (80:10:10)). Yield: 6.09 g (86 %). <sup>1</sup>H NMR (400 MHz, CDCl<sub>3</sub>)  $\delta$  7.65 (d,  $J$  = 8.0 Hz, 1H), 7.36 (t,  $J$  = 7.8 Hz, 1H), 7.29 (d,  $J$  = 6.2 Hz, 7H), 7.21 – 7.17 (m, 4H), 7.15 – 7.09 (m, 8H), 7.08 – 7.03 (m, 2H), 7.02 – 6.96 (m, 4H), 6.82 (d,  $J$  = 8.2 Hz, 1H), 3.25 (s, 3H). <sup>13</sup>C NMR (101 MHz, CDCl<sub>3</sub>)  $\delta$  157.0, 148.7, 147.6, 146.8, 139.5, 134.4, 134.4, 131.9, 130.7, 130.5, 129.6, 129.4, 129.2, 128.3, 128.2, 127.8, 126.4, 125.9, 124.6, 123.2,

122.8, 121.7, 120.8, 117.4, 111.2, 54.8. HR-MS (ESI): calculated for  $C_{40}H_{32}N_3O$  ( $[M+H]^+$ ): 570.2540, observed : 570.2564.

**Synthesis of 2-(1-(4-(diphenylamino)phenyl)-4,5-diphenyl-1H-pyrazol-3-yl)phenol (6a):**

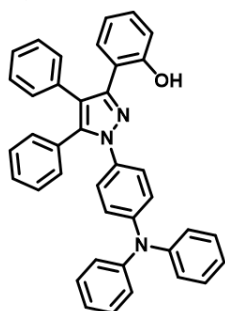

Compound **6a** was prepared following a procedure similar to that used for **1a**. The quantities involved are as follows: Compound **6b** (1.50 g, 2.63 mmol, 1.0 eq),  $BBr_3$  (1.25 mL, 13.18 mmol, 5.0 eq). The product (**6a**) was purified using silica gel column chromatography (*n*-hexane/EtOAc (94:06)). Crystallisation was done using  $CH_2Cl_2/n$ -hexane. Yield: 1.0 g (69 %).  $^1H$  NMR (400 MHz,  $CDCl_3$ )  $\delta$  = 11.01 (s, 1H, -OH), 7.30 – 7.18 (m, 12H), 7.16 – 7.01 (m, 13H), 6.99 (d,  $J$  = 8.0 Hz, 2H), 6.60 (t,  $J$  = 8.0 Hz, 1H).  $^{13}C$  NMR (101 MHz,  $CDCl_3$ )  $\delta$  = 156.4, 147.8, 147.3, 147.3, 141.6, 133.2, 132.5, 131.0, 130.4, 129.5, 129.4, 129.2, 128.6, 128.5, 128.3, 128.3, 127.4, 125.7,

124.9, 123.6, 122.6, 120.7, 118.8, 117.1, 116.7. HR-MS (ESI): calculated for  $C_{39}H_{30}N_3O$  ( $[M+H]^+$ ): 556.2389, observed : 556.2392.

**Synthesis of complex 6:** Compound **6** was prepared following a procedure similar to that used for **1**. The quantities involved are as follows: Compound **6a** (0.30 g,

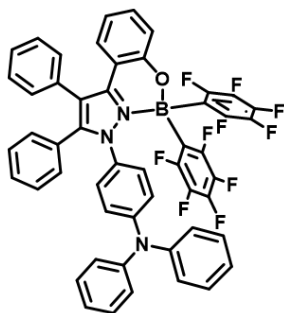

0.54 mmol, 1.0 eq) and tris(pentafluorophenyl)borane (0.33 g, 0.64 mmol, 1.2 eq) Crystallisation was done using  $CHCl_3/n$ -hexane. Yield: 0.25 g (52 %),  $^1H$  NMR (400 MHz,  $CDCl_3$ )  $\delta$  = 7.40 – 7.35 (m, 3H), 7.36 – 7.28 (m, 7H), 7.22 – 7.16 (m, 3H), 7.15 – 7.09 (m, 2H), 7.05 – 6.95 (m, 8H), 6.81 (d,  $J$  = 8.0 Hz, 2H), 6.64 – 6.58 (m, 1H), 6.54 (d,  $J$  = 8.0, 2H).  $^{13}C$  NMR (101 MHz,  $CDCl_3$ )  $\delta$  = 155.5, 149.4, 148.3 (d,  $J$  = 282.8 Hz) 147.3, 146.1, 142.3, 140.0 (d,  $J$  = 274.72 Hz), 139.8, 137.2 (d,  $J$  = 226.24 Hz) 133.0, 132.3, 130.9, 130.5, 129.9, 129.6,

129.1, 128.9, 128.6, 129.5, 128.4, 127.3, 126.7, 126.2, 125.2, 124.7, 119.7, 119.7, 118.9, 118.7.  $^{19}F$  NMR (376 MHz,  $CDCl_3$ )  $\delta$  = -134.27 (bs, 4F, Pf), -156.85 (t, 2F, Pf), -163.79 (t, 4F, Pf).  $^{11}B$  NMR (128 MHz,  $CDCl_3$ )  $\delta$  = -0.85. HR-MS (ESI): calculated for  $C_{51}H_{29}BF_{10}N_3O$  ( $[M+H]^+$ ): 900.2358, observed : 900.2347. Anal. Calcd for  $C_{51}H_{28}BF_{10}N_3O$ : C, 68.09; H, 3.14, N, 4.67. Found: C, 67.89; H, 3.32, N, 4.27.

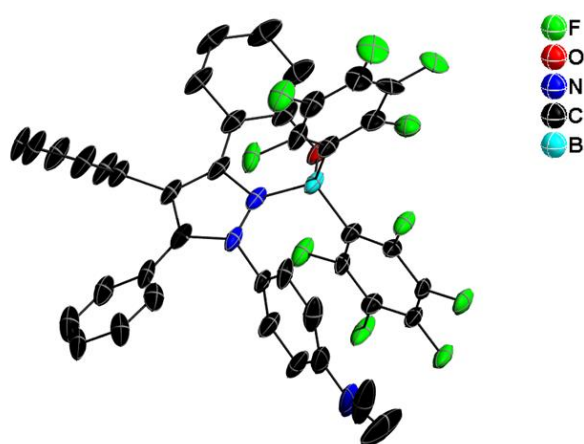

**Figure S1.** Molecular structures of compounds 5 with 30% probability level of thermal ellipsoids (hydrogen atoms are omitted for clarity).

**Table S1.** Bond length, bond angle and plane deviation measurement data for compounds **1**, **4**, and **5**.

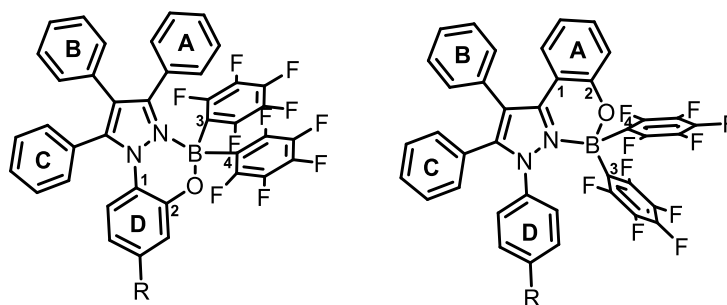

| Compound                                                          | <b>1</b>  | <b>4</b>  | <b>5</b>   |
|-------------------------------------------------------------------|-----------|-----------|------------|
| <b>B-N1 (Å)</b>                                                   | 1.596 (2) | 1.603 (2) | 1.577 (10) |
| <b>B-O (Å)</b>                                                    | 1.474 (2) | 1.462 (2) | 1.468 (12) |
| <b>B-C3 (Å)</b>                                                   | 1.644 (2) | 1.626 (3) | 1.646 (10) |
| <b>B-C4 (Å)</b>                                                   | 1.627 (2) | 1.650 (3) | 1.659 (10) |
| <b>N1-B-O (deg)</b>                                               | 105.1 (1) | 104.2 (1) | 104.4 (6)  |
| <b>N1-B-C3 (deg)</b>                                              | 109.7 (1) | 111.8 (1) | 110.7 (6)  |
| <b>O-B-C4 (deg)</b>                                               | 107.1 (1) | 108.8 (1) | 105.1 (6)  |
| <b>C3-B-C4 (deg)</b>                                              | 117.3 (1) | 114.8 (1) | 116.4 (5)  |
| <b>Deviation of B from N<sub>2</sub>C<sub>2</sub>OB plane (Å)</b> | 0.405 (1) | -         | -          |
| <b>Deviation of B from NC<sub>3</sub>OB plane (Å)</b>             | -         | 0.354 (1) | 0.343 (1)  |
| <b>Angle between pyrazole ring and plane A (°)</b>                | 62.7 (5)  | 11.1 (6)  | 14.2 (2)   |
| <b>Angle between pyrazole ring and plane B (°)</b>                | 45.2 (5)  | 82.2 (7)  | 60.9 (3)   |
| <b>Angle between pyrazole ring and plane C (°)</b>                | 58.6 (4)  | 54.7 (7)  | 41.5 (3)   |
| <b>Angle between pyrazole ring and plane D (°)</b>                | 26.5 (5)  | 85.8 (8)  | 78.5 (3)   |

**Table S2.** Photophysical data of compound **1-6** in different solvents

| Compound | Solvent | $\lambda_{\text{abs}}^a$ /nm ( $\epsilon \times 10^4/\text{M}^{-1}$<br>$\text{cm}^{-1}$ ) | $\lambda_{\text{ems}}^b$ (nm) | Stokes<br>Shift<br>( $\text{cm}^{-1}$ ) | $\Phi_{\text{F}}^d$ (%) | $\tau_{\text{av}}$<br>(ns) |
|----------|---------|-------------------------------------------------------------------------------------------|-------------------------------|-----------------------------------------|-------------------------|----------------------------|
| <b>1</b> | Toluene | 312 (1.28)                                                                                | 506                           | 12289                                   | 4.6,                    |                            |
|          | THF     | 307 (1.18)                                                                                | 515                           | 19417                                   | 1.4(5.6) <sup>f</sup>   | 1.3                        |
|          | ACN     | 307 (1.17)                                                                                | 517                           | 13231                                   | 0.5                     |                            |
|          |         |                                                                                           | 380 <sup>c</sup>              |                                         | 3.7 <sup>e</sup>        |                            |
| <b>2</b> | Toluene | 356 (1.42)                                                                                | 500                           | 8089                                    | 1.7,                    |                            |
|          | THF     | 352 (1.85)                                                                                | 533                           | 9648                                    | 0.5(41.6) <sup>f</sup>  | 2.8                        |
|          | ACN     | 348 (1.71)                                                                                | 555                           | 10717                                   | 0.7                     |                            |
|          |         |                                                                                           | 485 <sup>c</sup>              |                                         | 30.8 <sup>e</sup>       |                            |
| <b>3</b> | Toluene | 367 (1.86)                                                                                | 477                           | 6283                                    | 16.4,                   |                            |
|          | THF     | 365 (1.56)                                                                                | 508                           | 7712                                    | 14.0(32.1) <sup>f</sup> | 1.6                        |
|          | ACN     | 360 (1.73)                                                                                | 541                           | 9293                                    | 12.0                    |                            |
|          |         |                                                                                           | (452, 549) <sup>c</sup>       |                                         | 11.8 <sup>e</sup>       |                            |
| <b>4</b> | Toluene | 323 (0.74)                                                                                | 434                           | 7918                                    | 20.4,                   |                            |
|          | THF     | 319 (1.00)                                                                                | 440                           | 8620                                    | 18.9(19.6) <sup>f</sup> | 3.8                        |
|          | ACN     | 318 (1.04)                                                                                | 446                           | 9025                                    | 14.5                    |                            |
|          |         |                                                                                           | 380 <sup>c</sup>              |                                         | 5.4 <sup>e</sup>        |                            |
| <b>5</b> | Toluene | 318 (1.81)                                                                                | 438                           | 8615                                    | <0.1                    |                            |
|          | THF     | 318 (1.27)                                                                                | 475                           | 10394                                   | <0.1(15.5) <sup>f</sup> | -                          |
|          | ACN     | 316 (1.44)                                                                                | 500                           | 11645                                   | 0.2                     |                            |
|          |         |                                                                                           | 408 <sup>c</sup>              |                                         | 28.2 <sup>e</sup>       |                            |
| <b>6</b> | Toluene | 328 (1.99)                                                                                | 432                           | 7339                                    | 4.0,                    |                            |
|          | THF     | 324 (1.65)                                                                                | 446                           | 8443                                    | 1.6(29.6) <sup>f</sup>  | 2.9                        |
|          | ACN     | 320 (1.99)                                                                                | 468                           | 9883                                    | 5.3                     |                            |
|          |         |                                                                                           | 438 <sup>c</sup>              |                                         | 23.2 <sup>e</sup>       |                            |

<sup>a</sup>Absorption maximum (concentration =  $5.0 \times 10^{-5}$  M), <sup>b</sup>excited at  $\lambda_{\text{max}}$ , <sup>c</sup>solid state emission maxima,

<sup>d</sup>absolute quantum yield using integrating sphere module, <sup>e</sup>Solid state quantum yield using integrating

sphere module, <sup>f</sup>absolute quantum yield of AIE (99 : 1) (H<sub>2</sub>O : THF) of using integrating sphere module.

**Table S3.** Fluorescence lifetime of compound **1-6** in THF with concentration of  $5.0 \times 10^{-5}$  M.

| Compound | B <sub>1</sub> | $\tau_1$ (ns) |
|----------|----------------|---------------|
| <b>1</b> | 1.00           | 1.3           |
| <b>2</b> | 1.00           | 0.2           |
| <b>3</b> | 1.00           | 1.6           |
| <b>4</b> | 1.00           | 3.9           |
| <b>5</b> | 1.00           | 2.2           |
| <b>6</b> | 1.00           | 0.9           |

B<sub>1</sub> represent the fractional amount of molecules in each environment.

**Table S4.** Fluorescence lifetime of compound **1-6** in water fraction ( $f_w=99\%$ ) with concentration of  $5.0 \times 10^{-5}$  M.

| Compounds            | B <sub>1</sub> /B <sub>2</sub> /B <sub>3</sub> | $\tau_1$ (ns) | $\tau_2$ (ns) | $\tau_3$ (ns) |
|----------------------|------------------------------------------------|---------------|---------------|---------------|
| <b>1</b>             | 0.78/0.22/0                                    | 0.6           | 3.1           | -             |
| <b>2</b>             | 0.26/0.74/0                                    | 3.8           | 7.9           | -             |
| <b>2 (Thin film)</b> | 0.16/0.84                                      | 2.2           | 5.2           | -             |
| <b>3</b>             | 0.26/0.64/0.10                                 | 1.5           | 4.9           | 16.1          |
| <b>4</b>             | 0.47/0.53/0                                    | 1.6           | 4.4           | -             |
| <b>5</b>             | 0.18/0.56/0.26                                 | 1.4           | 4.4           | 10.0          |
| <b>6</b>             | 0.51/0.49/0                                    | 2.3           | 6.1           | -             |

B<sub>1</sub>B<sub>2</sub>B<sub>3</sub> represent the fractional amount of molecules in each environment.

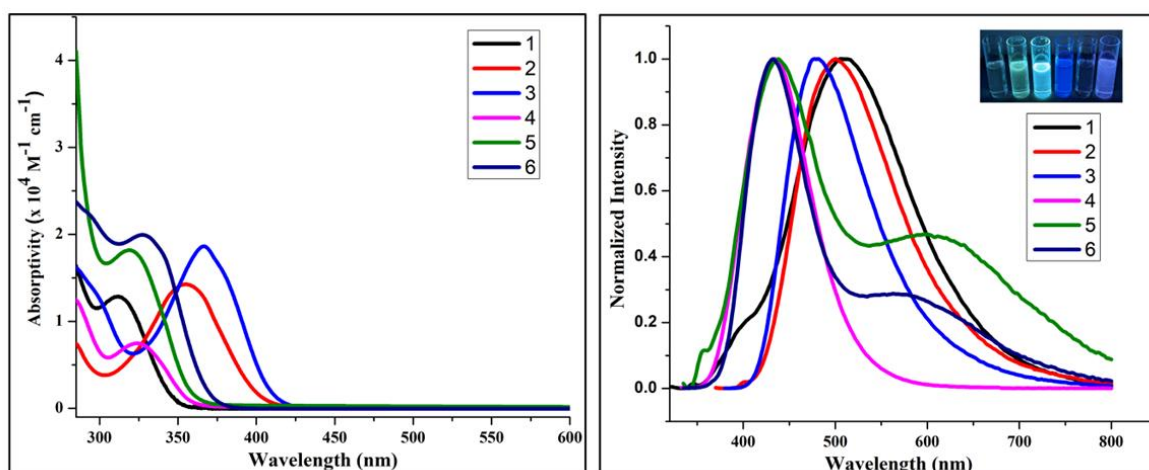

**Figure S2:** Absorption spectra of compounds **1-6** (Left) and normalized emission spectra of compounds **1-6** (Right) in toluene ( $5.0 \times 10^{-5}$  M concentration) inset (Right): photograph of compounds **1-6** taken under hand-held UV lamp 365nm.



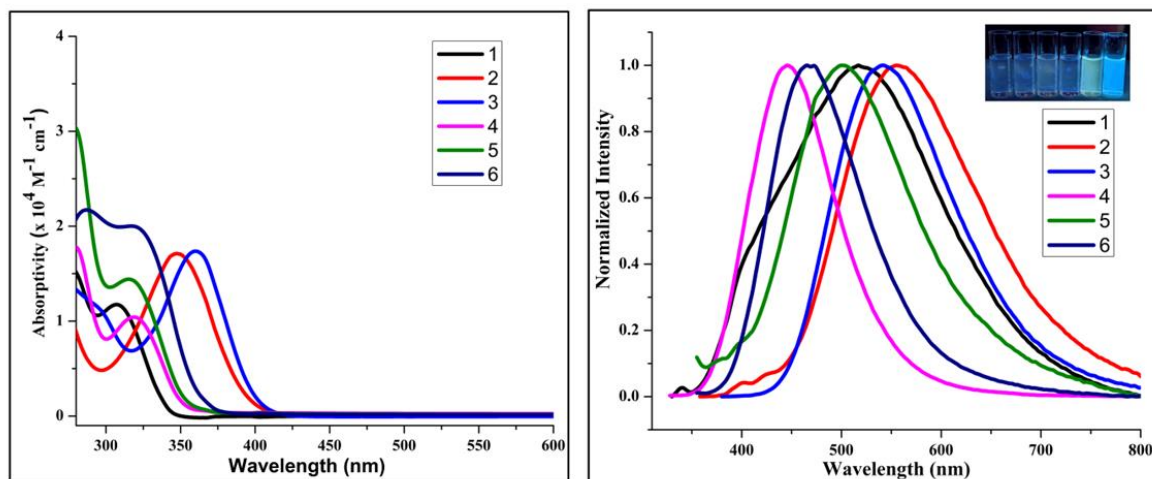

**Figure S3:** Absorption spectra of compounds **1-6** (Left) and normalized emission spectra of compounds **1-6** (Right) in acetonitrile ( $5.0 \times 10^{-5}$  M concentration) inset (Right): photograph of compounds **1-6** taken under hand-held UV lamp 365nm.

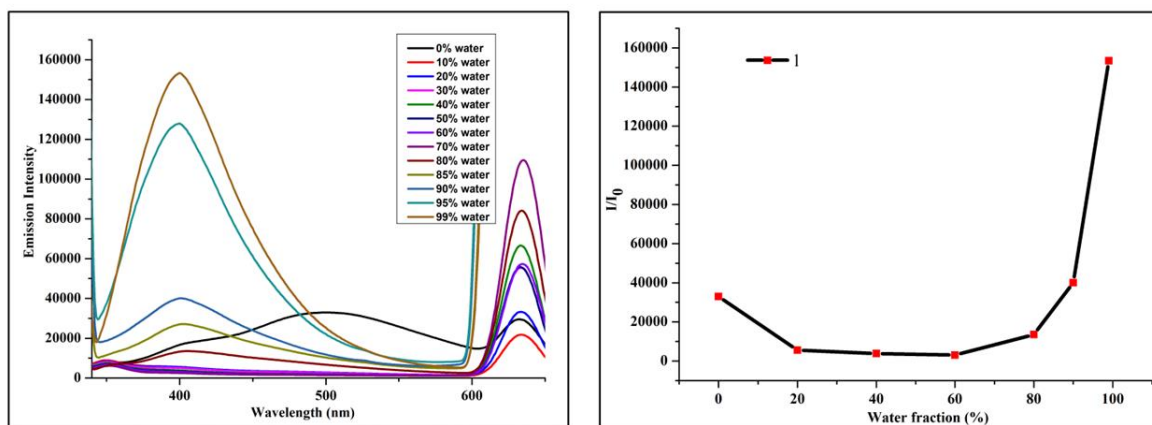

**Figure S4:** Fluorescence spectra of compound **1** ( $5.0 \times 10^{-5}$  M) in a THF/ $H_2O$  mixture with different water fraction ( $f_w$ ) (left).  $I/I_0$  vs water fraction plot for compound **1** (vol%) (right).

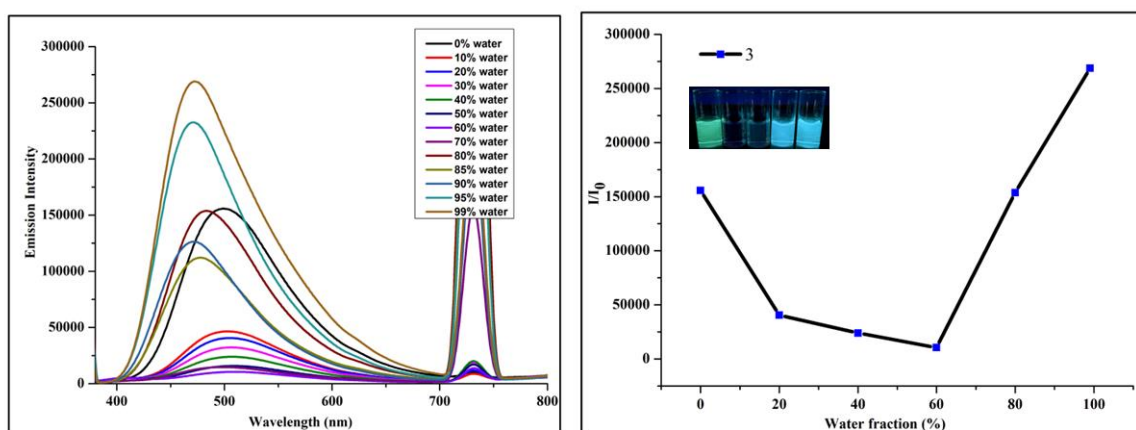

**Figure S5:** Fluorescence spectra of compound **3** ( $5.0 \times 10^{-5}$  M) in a THF/ $H_2O$  mixture with different water fraction ( $f_w$ ) (left).  $I/I_0$  vs water fraction plot for compound **3** (vol%) (right).

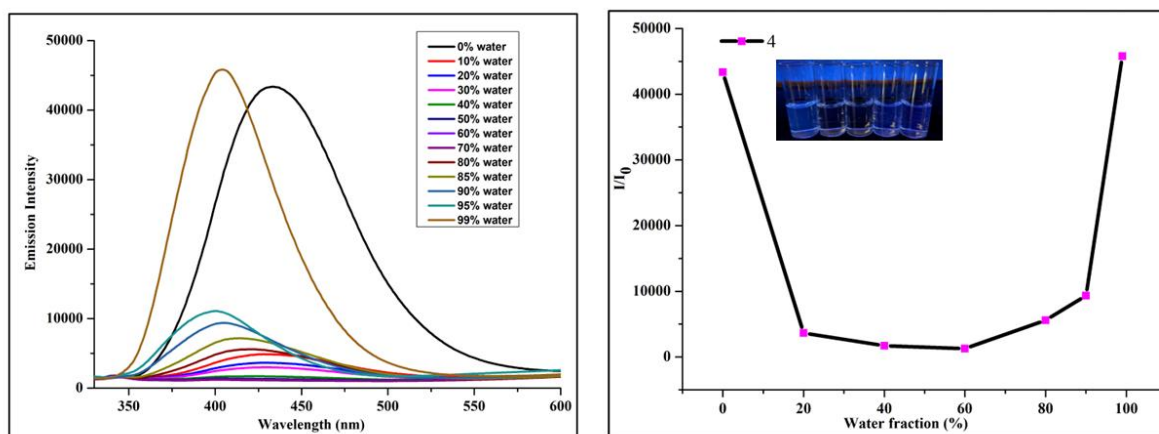

**Figure S6:** Fluorescence spectra of compound **4** ( $5.0 \times 10^{-5}$  M) in a THF/H<sub>2</sub>O mixture with different water fraction ( $f_w$ ) (left).  $I/I_0$  vs water fraction plot for compound **4** (vol%) (right).

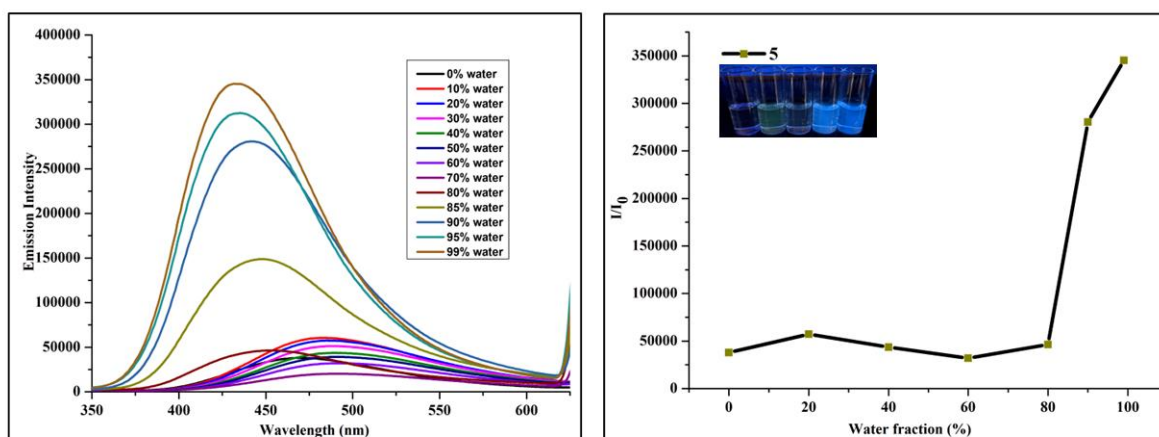

**Figure S7:** Fluorescence spectra of compound **5** ( $5.0 \times 10^{-5}$  M) in a THF/H<sub>2</sub>O mixture with different water fraction ( $f_w$ ) (left).  $I/I_0$  vs water fraction plot for compound **5** (vol%) (right).

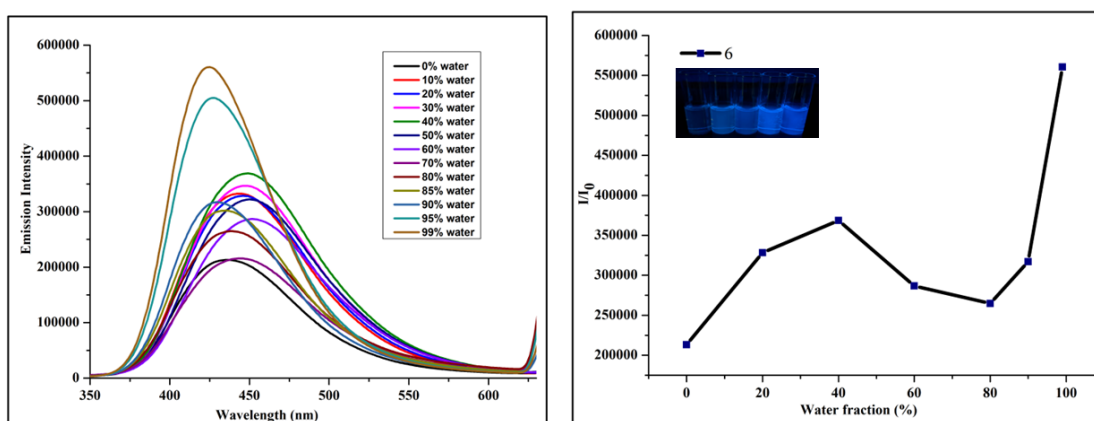

**Figure S8:** Fluorescence spectra of compound **6** ( $5.0 \times 10^{-5}$  M) in a THF/H<sub>2</sub>O mixture with different water fraction ( $f_w$ ) (left).  $I/I_0$  vs water fraction plot for compound **6** (vol%) (right).

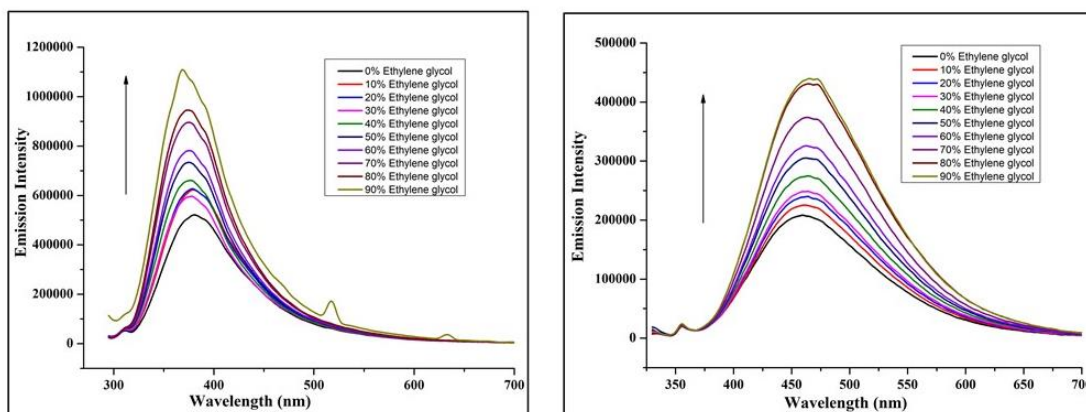

**Figure S9:** Emission spectra of compound **1** (Left) and compound **2** (Right) with the addition of different percentage of MeOH/Ethylene glycol mixture ( $10^{-5}$  M concentration).

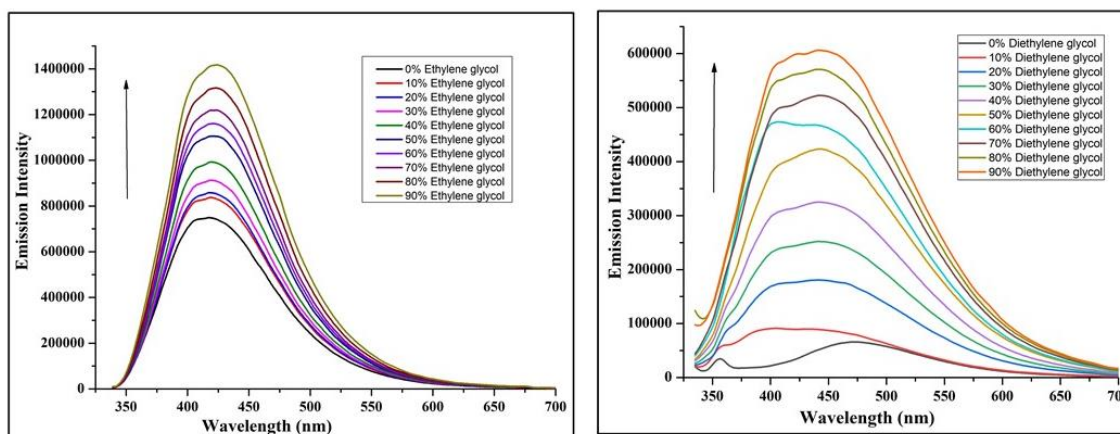

**Figure S10:** Emission spectra of compound **3** (Left) and Compound **4** (Right) with the addition of different percentage of MeOH/Ethylene glycol or Diethylene glycol mixture ( $10^{-5}$  M concentration).

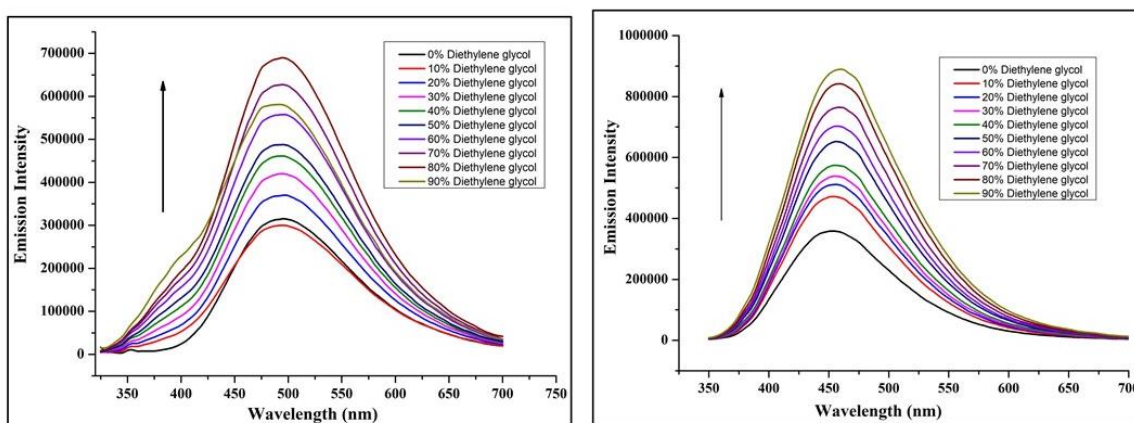

**Figure S11:** Emission spectra of compound **5** (Left) and Compound **6** (Right) with the addition of different percentage of MeOH/Diethylene glycol mixture ( $10^{-5}$  M concentration).

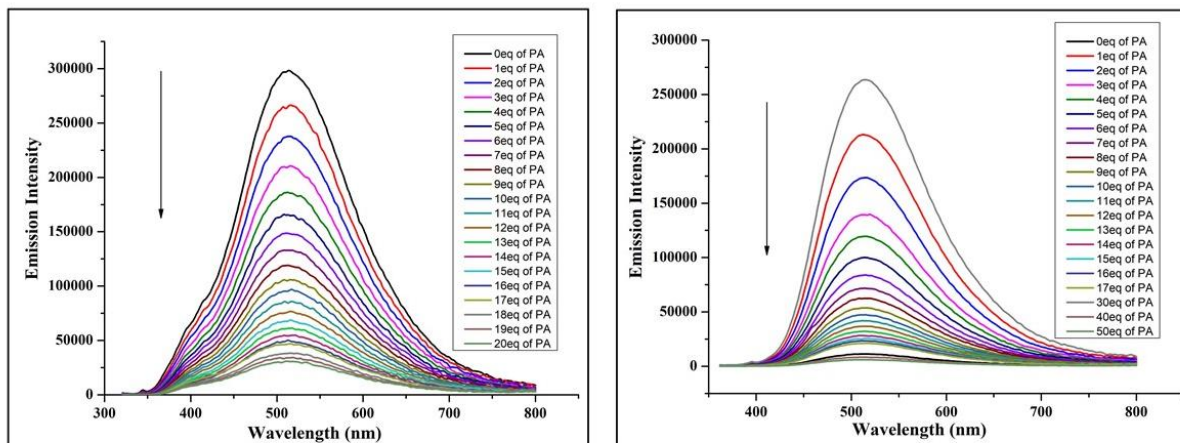

**Figure S12:** Emission spectra of compound 1 (Left) and Compound 2 (Right) with the addition of different equivalents of picric acid in dichloromethane ( $10^{-5}$  M concentration).

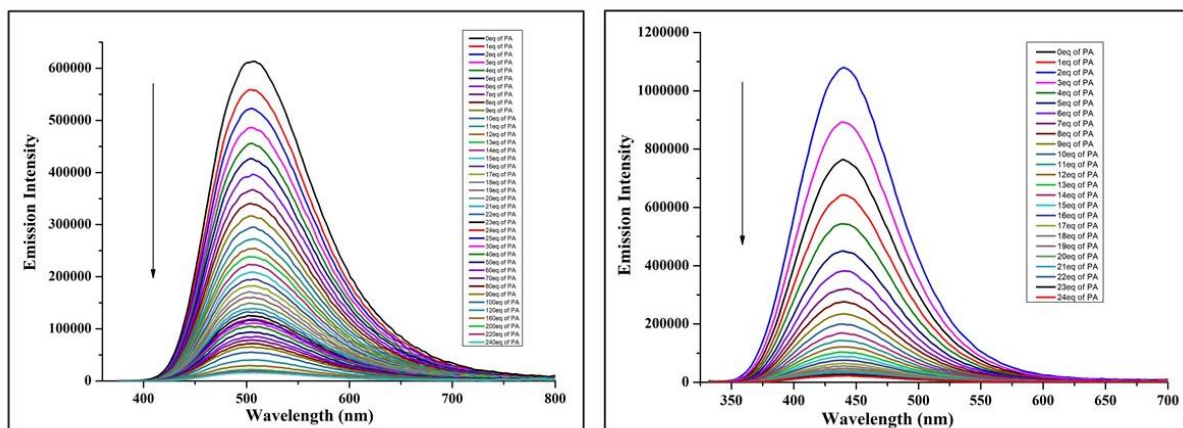

**Figure S13:** Emission spectra of compound 3 (Left) and Compound 4 (Right) with the addition of different equivalents of picric acid in dichloromethane ( $10^{-5}$  M concentration).

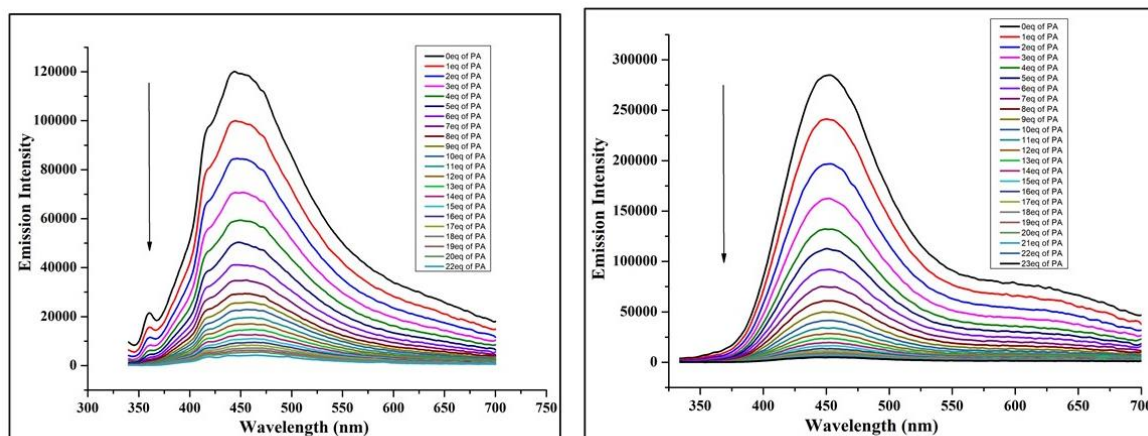

**Figure S14:** Emission spectra of compound 5 (Left) and Compound 6 (Right) with the addition of different equivalents of picric acid in dichloromethane ( $10^{-5}$  M concentration).

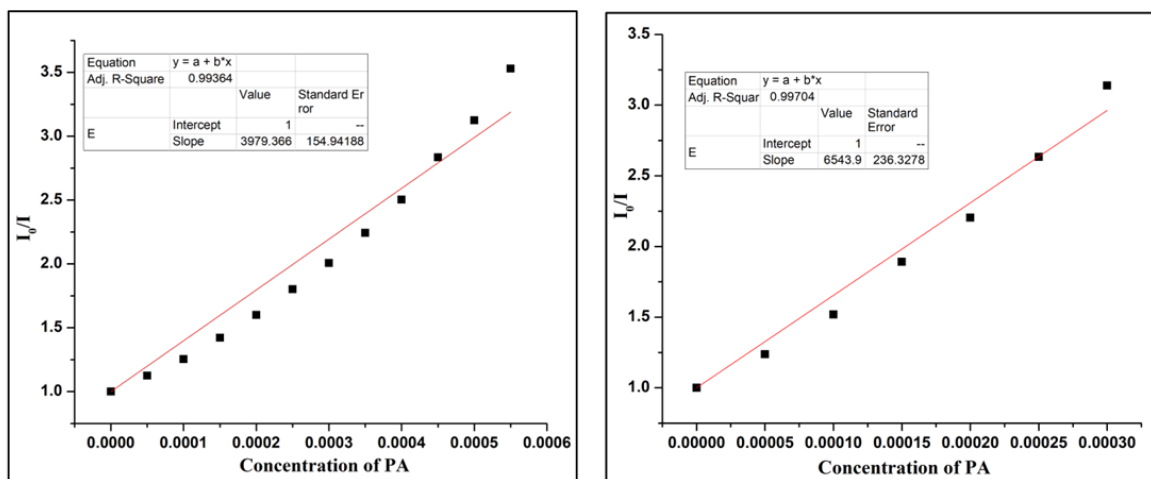

Figure S15: Stern-Volmer plot of compound 1 (Left) and 2 (Right).

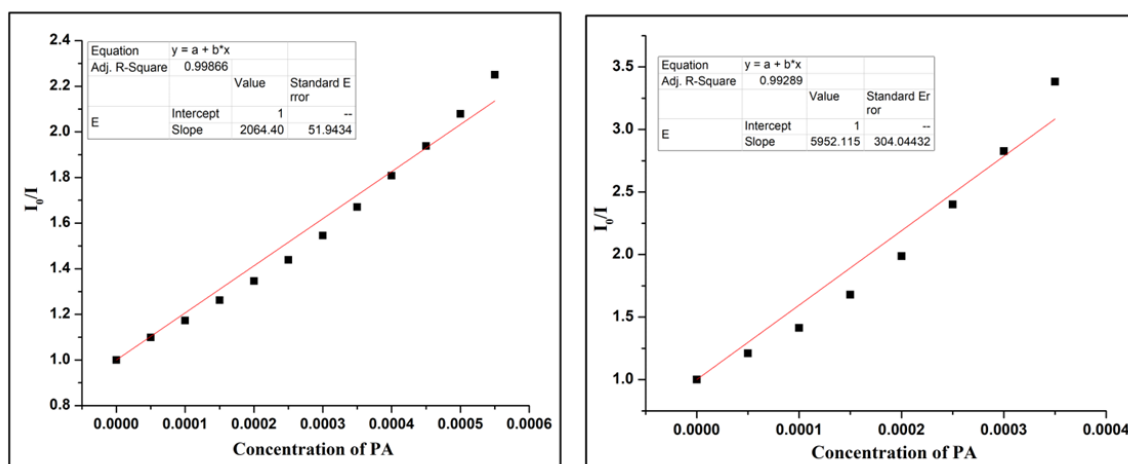

Figure S16: Stern-Volmer plot of compound 3 (Left) and 4 (Right).

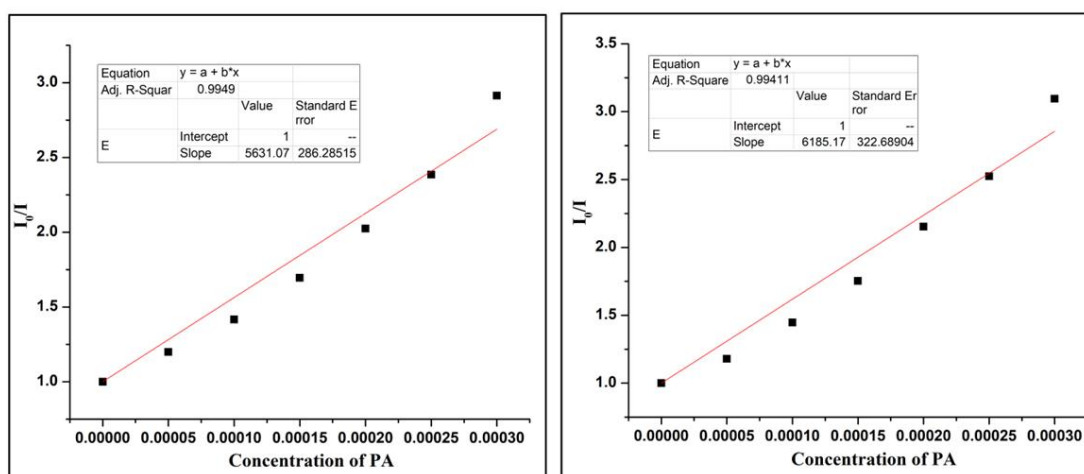

Figure S17: Stern-Volmer plot of compound 5 (Left) and 6 (Right).

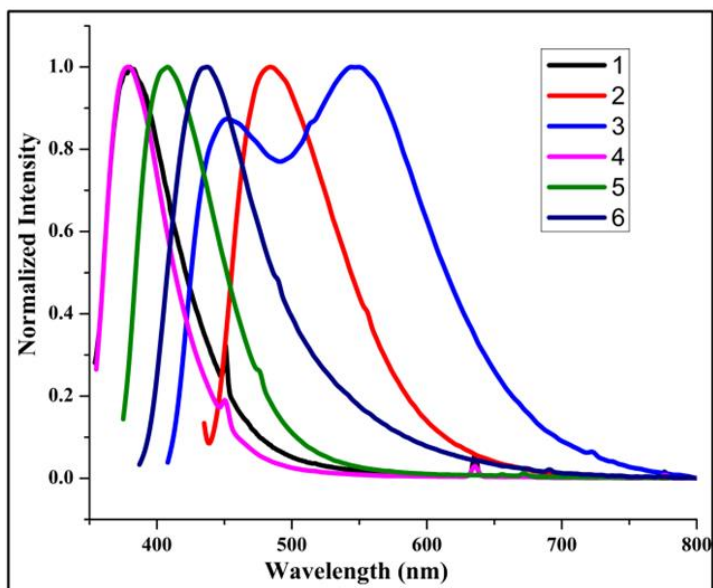

Figure S18: Solid-state emission spectra of pyrazole compound **1-6**.

**Table S5. Crystal data and structure refinement for Compound 1, 4, 5.**

|                                             | <b>Compound 1</b>                                                 | <b>Compound 4</b>                                                                 | <b>Compound 5</b>                                                 |
|---------------------------------------------|-------------------------------------------------------------------|-----------------------------------------------------------------------------------|-------------------------------------------------------------------|
| Empirical formula                           | C <sub>39</sub> H <sub>19</sub> BF <sub>10</sub> N <sub>2</sub> O | C <sub>40</sub> H <sub>20</sub> BCl <sub>3</sub> F <sub>10</sub> N <sub>2</sub> O | C <sub>41</sub> H <sub>24</sub> BF <sub>10</sub> N <sub>3</sub> O |
| Formula weight                              | 732.37                                                            | 851.74                                                                            | 775.44                                                            |
| Temperature/K                               | 100.00(10)                                                        | 299.6(9)                                                                          | 113(18)                                                           |
| Crystal system                              | triclinic                                                         | triclinic                                                                         | monoclinic                                                        |
| Space group                                 | P-1                                                               | P-1                                                                               | P2 <sub>1</sub>                                                   |
| a/Å                                         | 7.88670(10)                                                       | 8.8799(2)                                                                         | 12.4589(13)                                                       |
| b/Å                                         | 13.1605(3)                                                        | 14.0601(3)                                                                        | 12.9868(9)                                                        |
| c/Å                                         | 17.5175(4)                                                        | 16.9083(3)                                                                        | 12.6311(11)                                                       |
| α/°                                         | 109.877(2)                                                        | 75.691(2)                                                                         | 90                                                                |
| β/°                                         | 90.082(2)                                                         | 81.675(2)                                                                         | 107.763(10)                                                       |
| γ/°                                         | 107.239(2)                                                        | 78.457(2)                                                                         | 90                                                                |
| Volume/Å <sup>3</sup>                       | 1622.45(6)                                                        | 1994.05(8)                                                                        | 1946.3(3)                                                         |
| Z                                           | 2                                                                 | 2                                                                                 | 2                                                                 |
| ρ <sub>calc</sub> /cm <sup>3</sup>          | 1.499                                                             | 1.419                                                                             | 1.323                                                             |
| μ/mm <sup>-1</sup>                          | 0.130                                                             | 2.808                                                                             | 0.113                                                             |
| F(000)                                      | 740.0                                                             | 856.0                                                                             | 788.0                                                             |
| Crystal size/mm <sup>3</sup>                | 0.15 × 0.12 × 0.11                                                | 0.14 × 0.13 × 0.11                                                                | 0.14 × 0.12 × 0.11                                                |
| Radiation                                   | MoKα (λ = 0.71073)                                                | Cu Kα (λ = 1.54184)                                                               | MoKα (λ = 0.71073)                                                |
| 2θ range for data collection/°              | 6.94 to 49.998                                                    | 7.53 to 156.84                                                                    | 6.668 to 52.732                                                   |
| Index ranges                                | -9 ≤ h ≤ 9, -15 ≤ k ≤ 15, -20 ≤ l ≤ 20                            | -11 ≤ h ≤ 11, -17 ≤ k ≤ 17, -20 ≤ l ≤ 20                                          | -15 ≤ h ≤ 14, -15 ≤ k ≤ 16, -15 ≤ l ≤ 15                          |
| Reflections collected                       | 22626                                                             | 37407                                                                             | 32402                                                             |
| Independent reflections                     | 5704 [R <sub>int</sub> = 0.0314, R <sub>sigma</sub> = 0.0223]     | 8039 [R <sub>int</sub> = 0.0632, R <sub>sigma</sub> = 0.0320]                     | 7671 [R <sub>int</sub> = 0.1186, R <sub>sigma</sub> = 0.0627]     |
| Data/restraints/parameters                  | 5704/0/478                                                        | 8039/0/479                                                                        | 7671/1107/516                                                     |
| Goodness-of-fit on F <sup>2</sup>           | 1.035                                                             | 1.082                                                                             | 1.066                                                             |
| Final R indexes [I >= 2σ (I)]               | R <sub>1</sub> = 0.0332, wR <sub>2</sub> = 0.0871                 | R <sub>1</sub> = 0.0583, wR <sub>2</sub> = 0.1726                                 | R <sub>1</sub> = 0.0859, wR <sub>2</sub> = 0.1948                 |
| Final R indexes [all data]                  | R <sub>1</sub> = 0.0361, wR <sub>2</sub> = 0.0892                 | R <sub>1</sub> = 0.0673, wR <sub>2</sub> = 0.1823                                 | R <sub>1</sub> = 0.0927, wR <sub>2</sub> = 0.2002                 |
| Largest diff. peak/hole / e Å <sup>-3</sup> | 0.30/-0.23                                                        | 0.21/-0.27                                                                        | 0.49/-0.38                                                        |
| Flack parameter                             | -                                                                 | -                                                                                 | -1.3(5)                                                           |

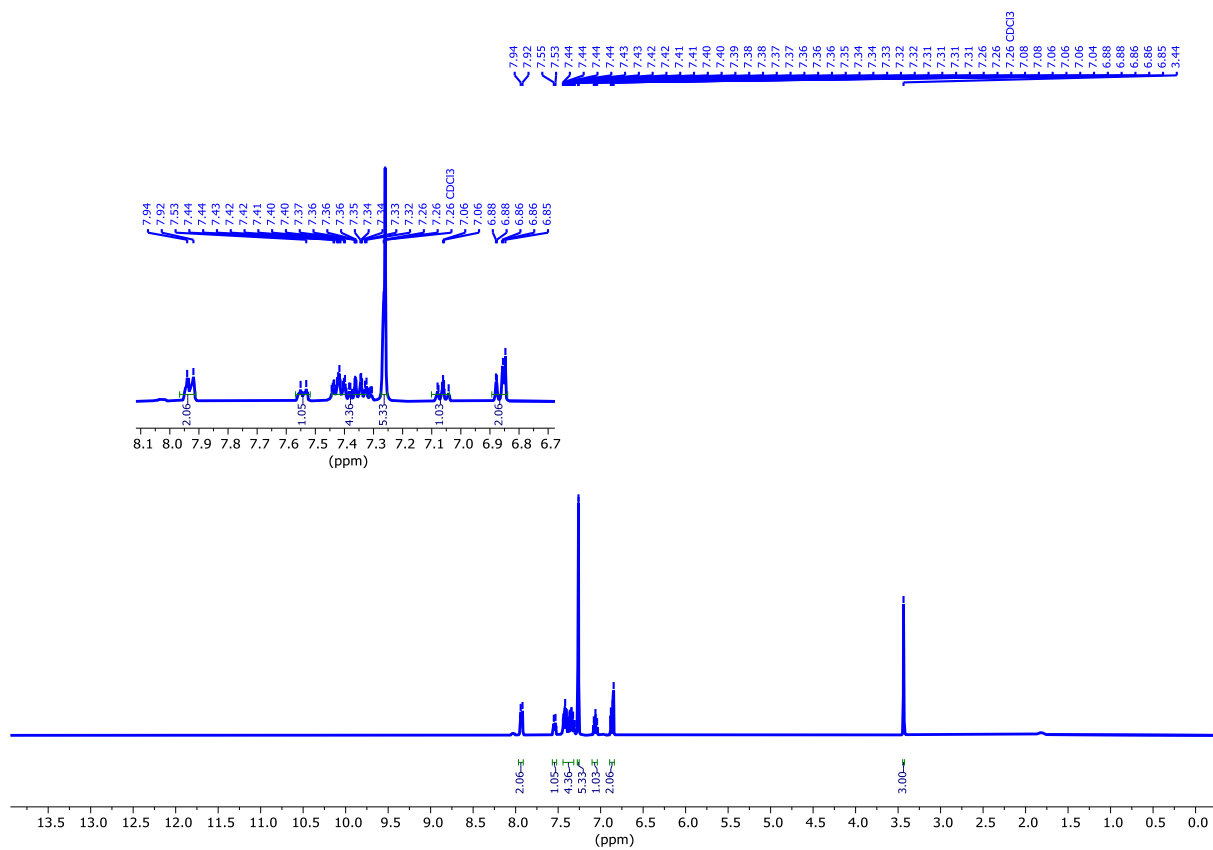

**Figure S19:**  $^1\text{H-NMR}$  (400 MHz) spectrum of compound 1d in  $\text{CDCl}_3$

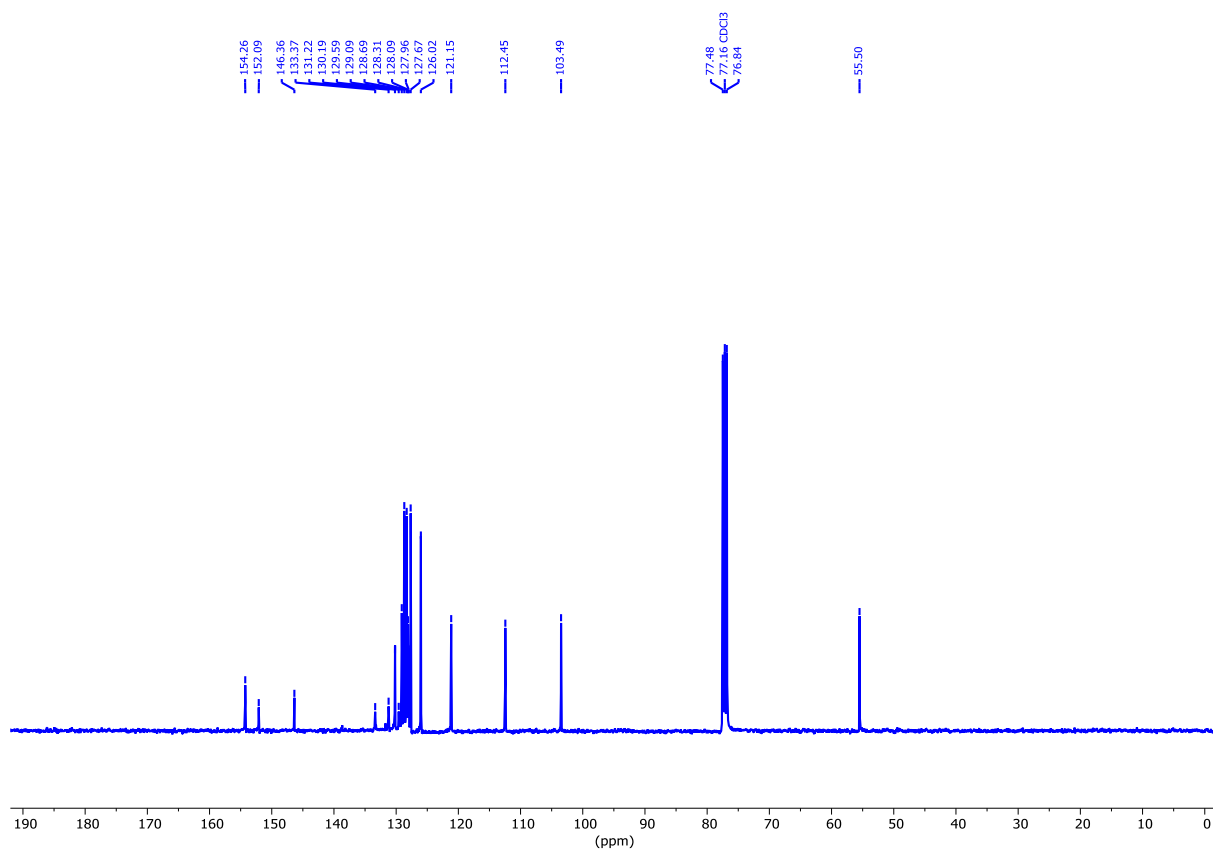

**Figure S20:**  $^{13}\text{C-NMR}$  (101 MHz) spectrum of compound 1d in  $\text{CDCl}_3$



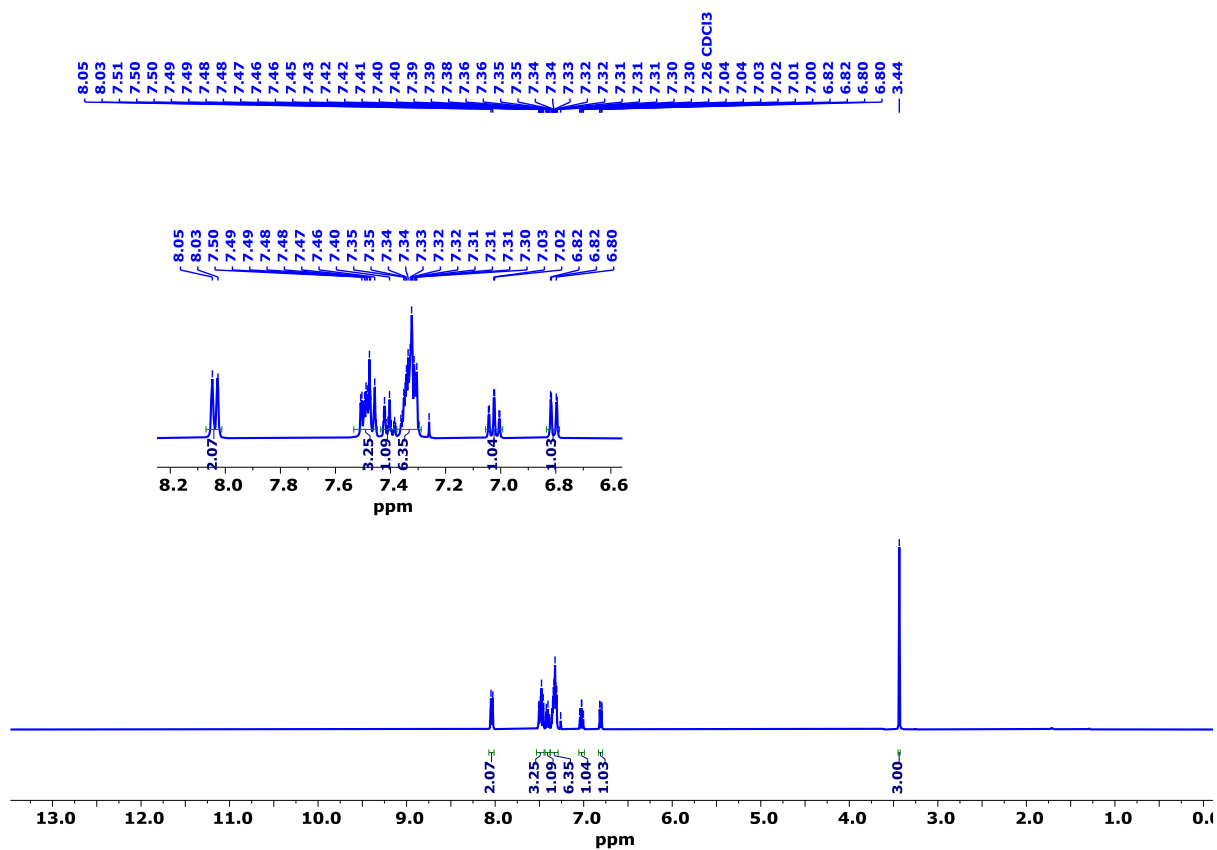

Figure S21:  $^1\text{H-NMR}$  (400 MHz) spectrum of compound 1c in  $\text{CDCl}_3$

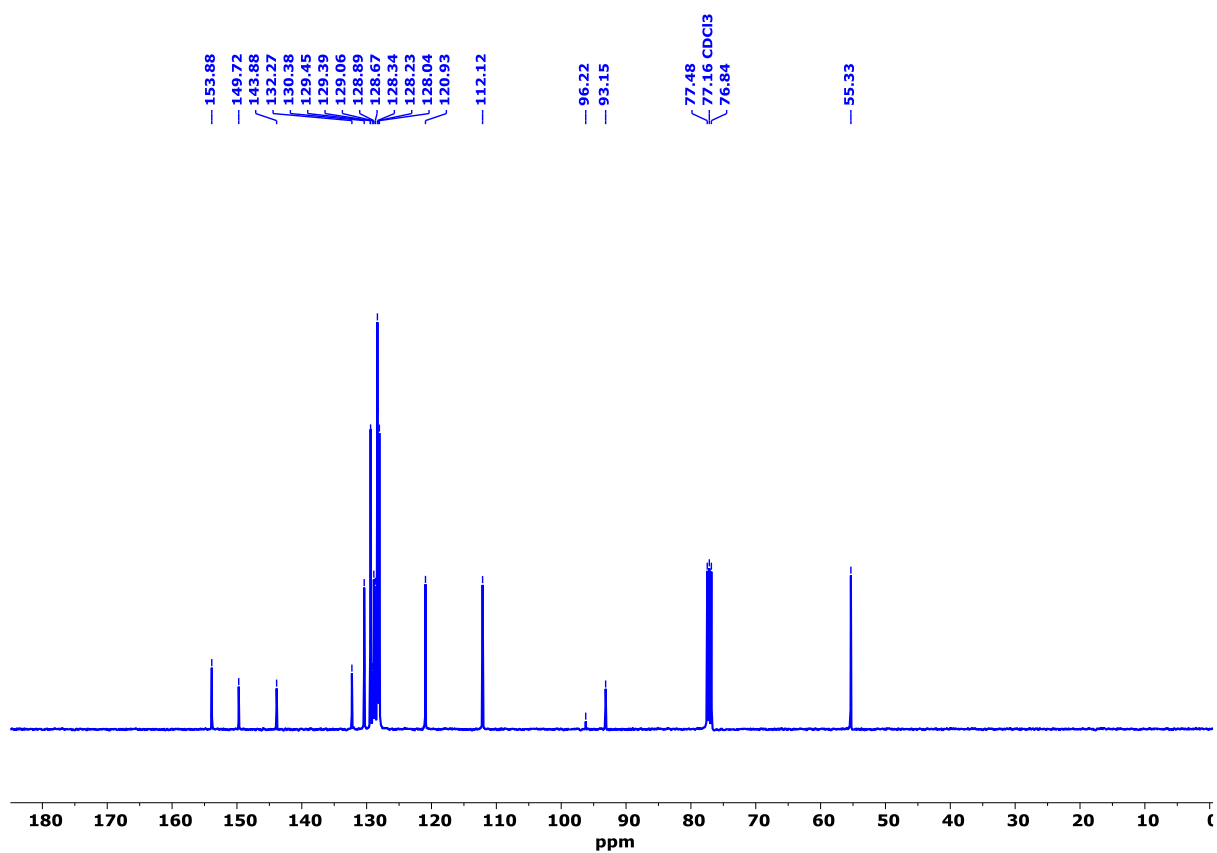

Figure S22:  $^{13}\text{C-NMR}$  (101 MHz) spectrum of compound 1c in  $\text{CDCl}_3$

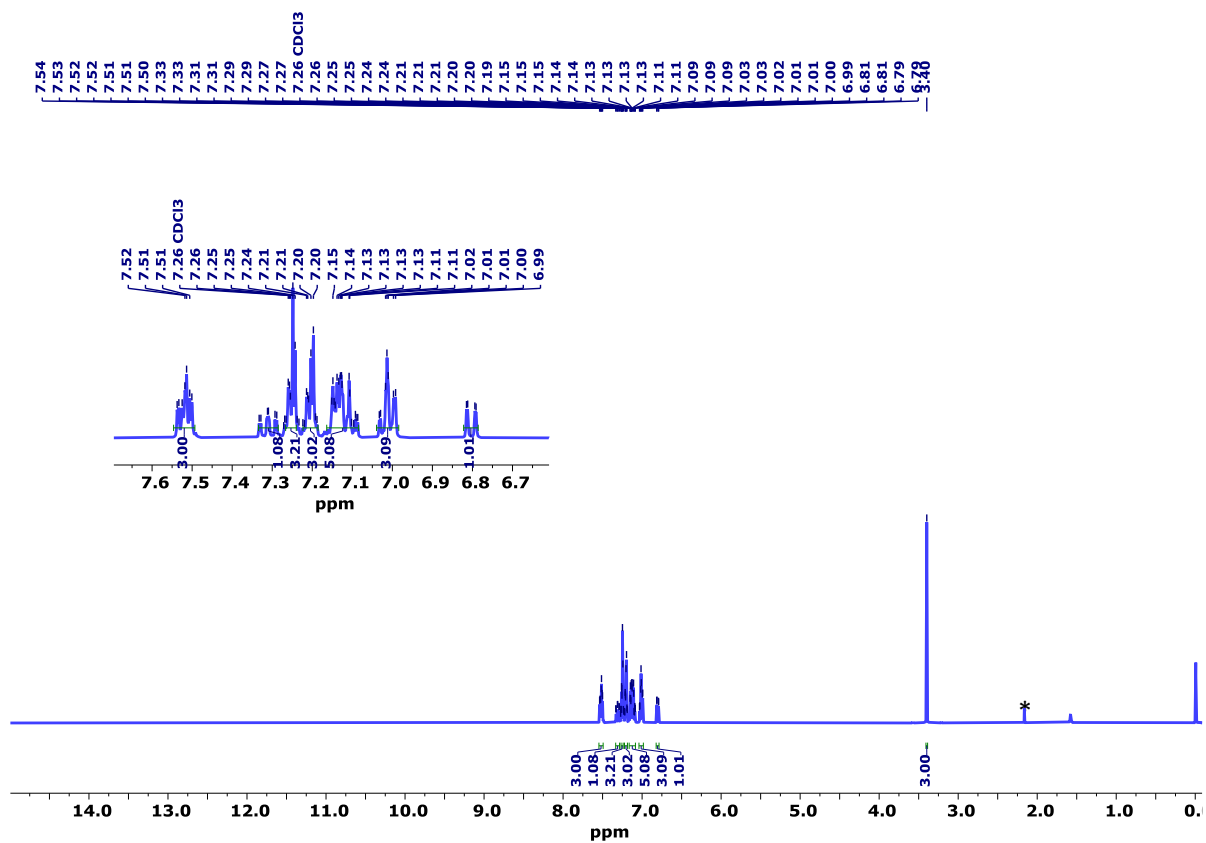

Figure S23:  $^1\text{H-NMR}$  (400 MHz) spectrum of compound 1b in  $\text{CDCl}_3$  (\*Toluene  $-\text{CH}_3$  peak)

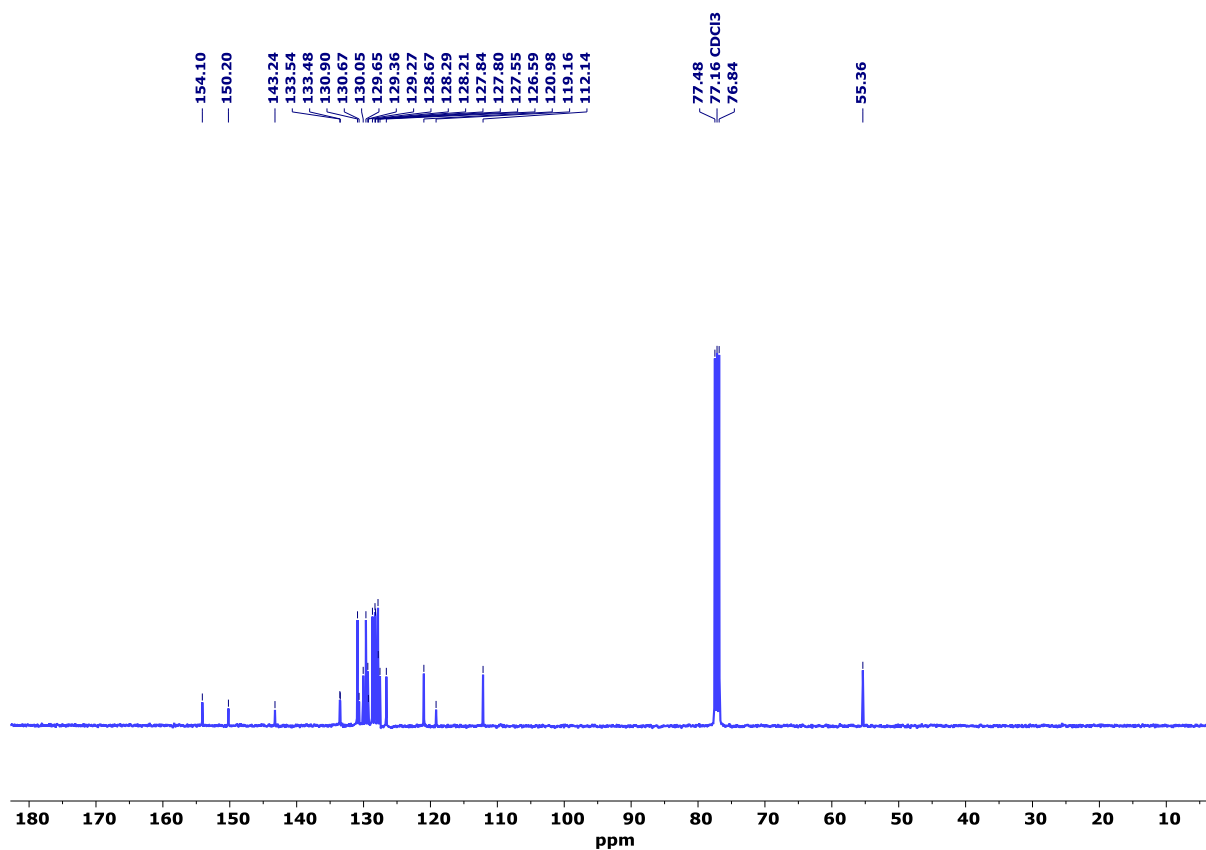

Figure S24:  $^{13}\text{C-NMR}$  (101 MHz) spectrum of compound 1b in  $\text{CDCl}_3$

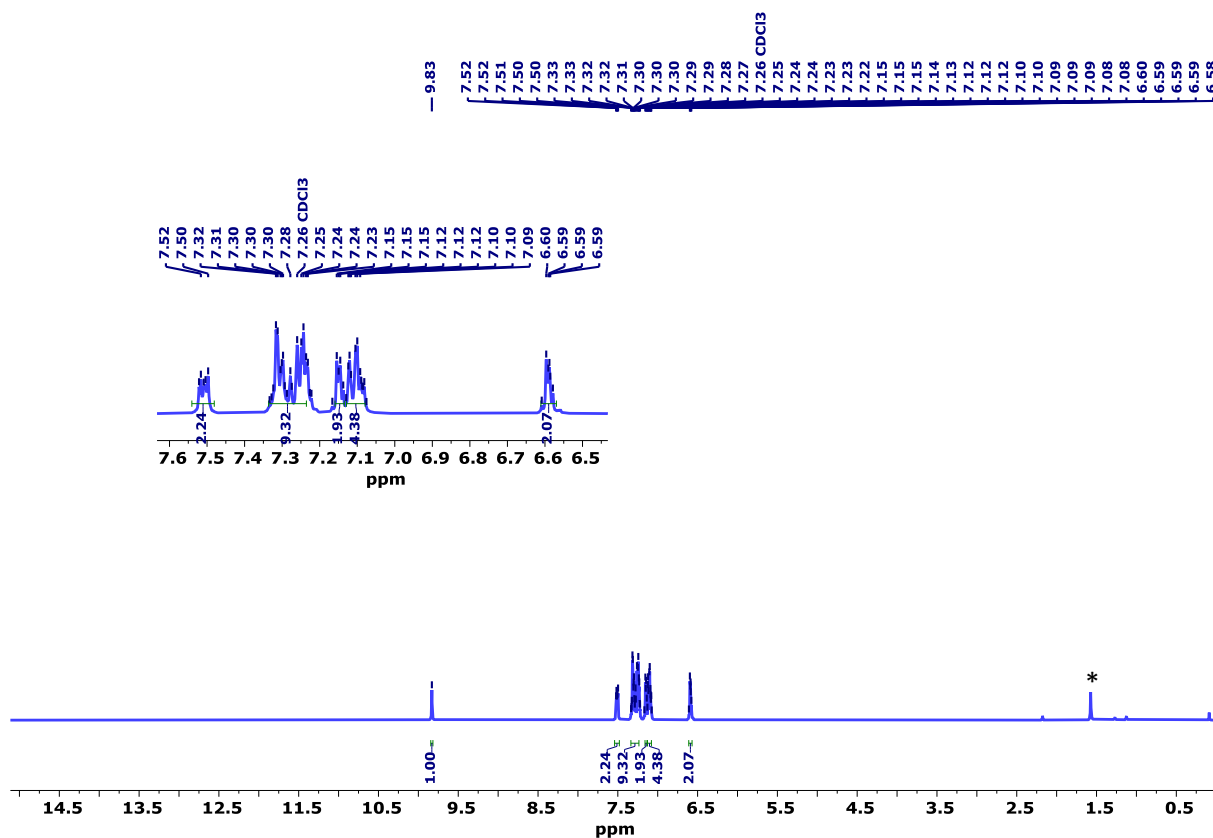

Figure S25:  $^1\text{H-NMR}$  (400 MHz) spectrum of compound 1a in  $\text{CDCl}_3$  (\* $\text{H}_2\text{O}$  peak)

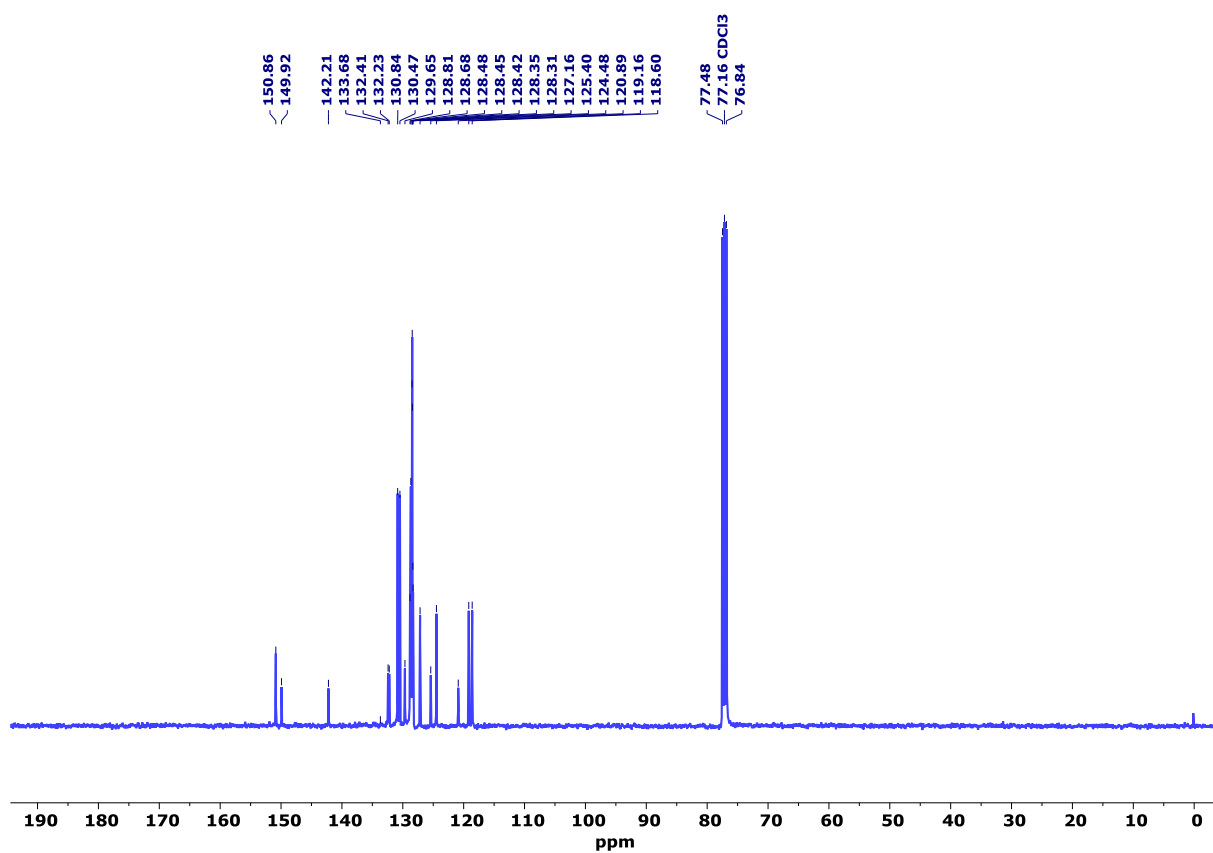

Figure S26:  $^{13}\text{C-NMR}$  (101 MHz) spectrum of compound 1a in  $\text{CDCl}_3$

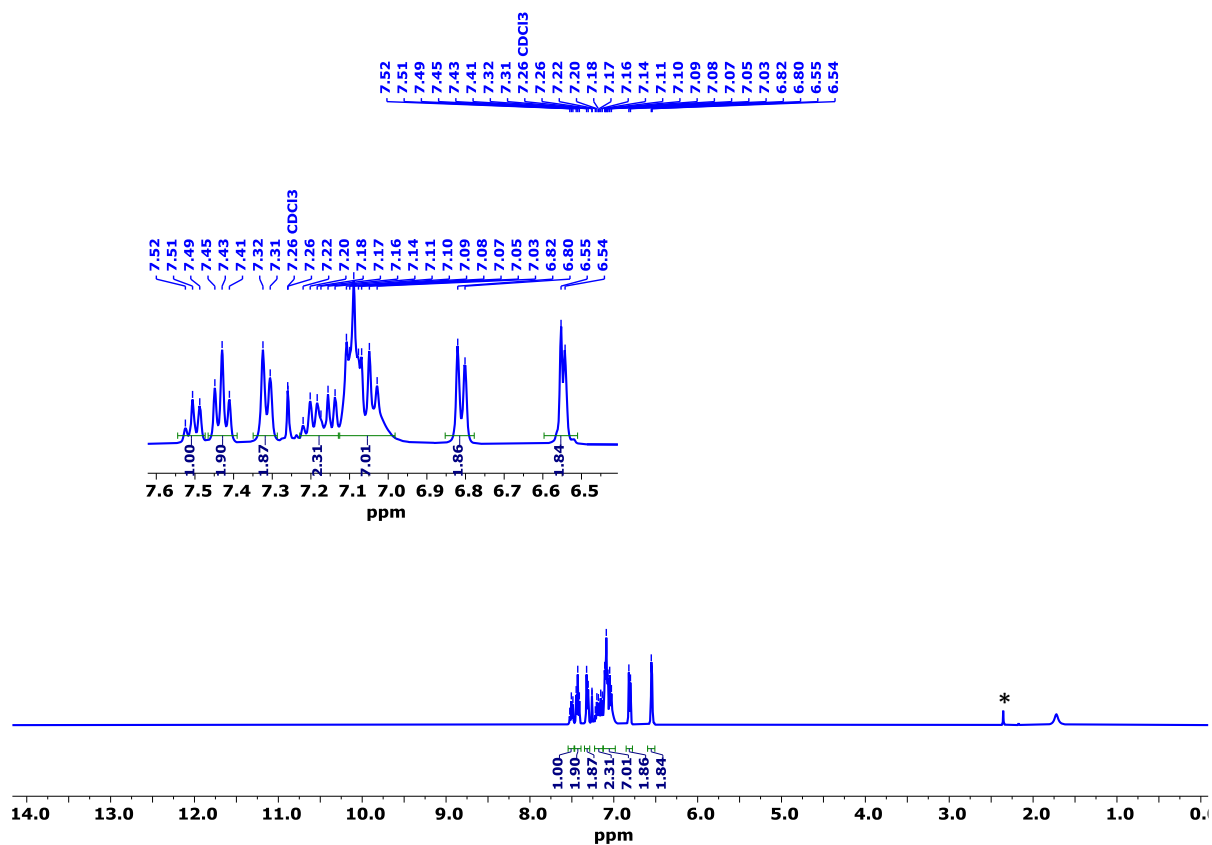

Figure S27:  $^1\text{H-NMR}$  (400 MHz) spectrum of compound 1 in  $\text{CDCl}_3$  (\* Toluene  $-\text{CH}_3$ )

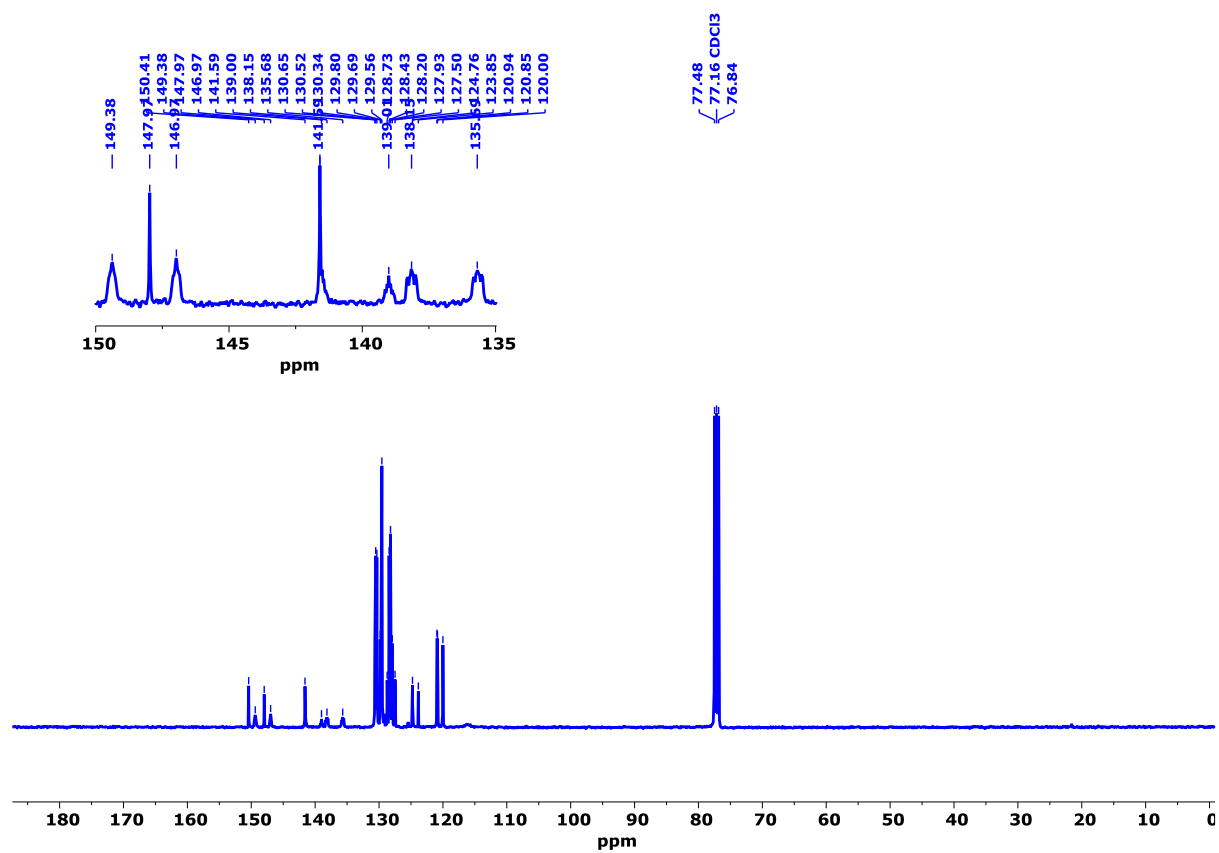

Figure S28:  $^{13}\text{C-NMR}$  (101 MHz) spectrum of compound 1 in  $\text{CDCl}_3$

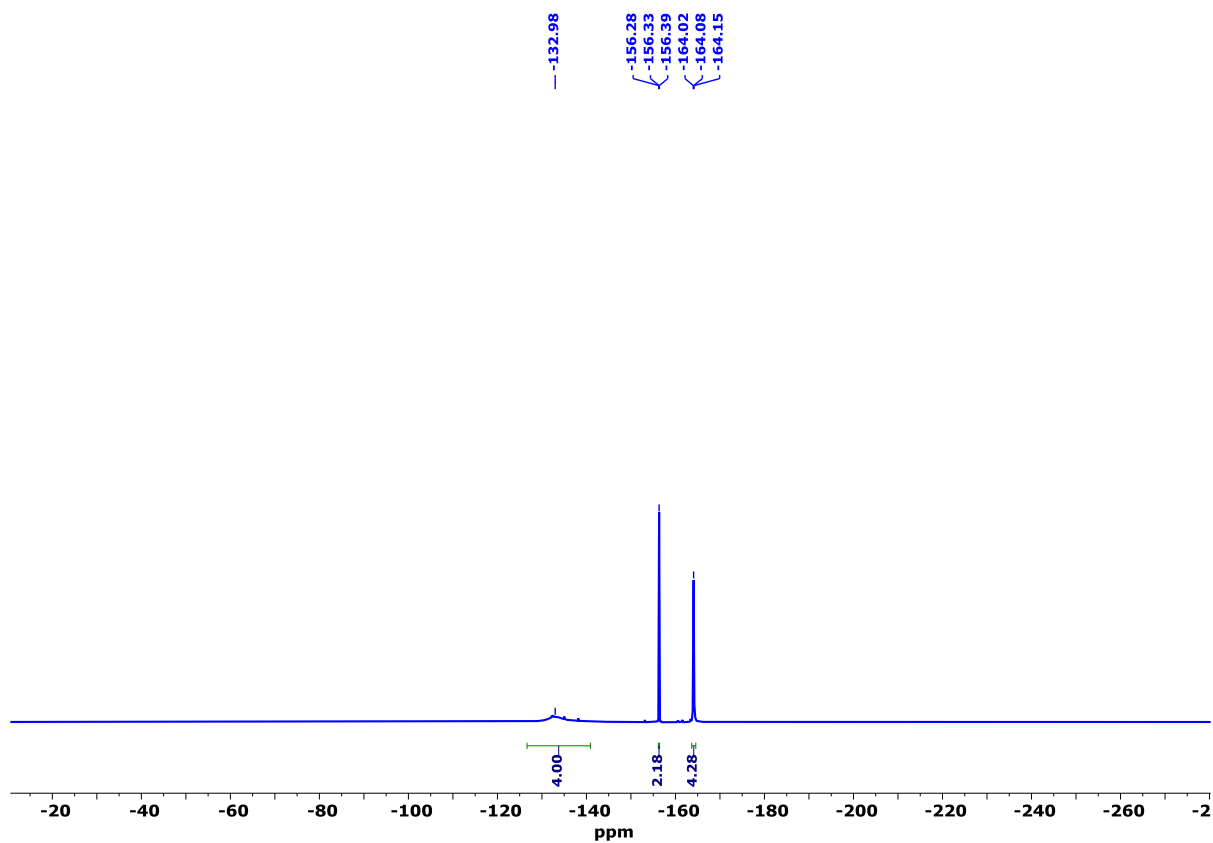

**Figure S29:**  $^{19}\text{F}$ -NMR (376 MHz) spectrum of compound 1 in  $\text{CDCl}_3$

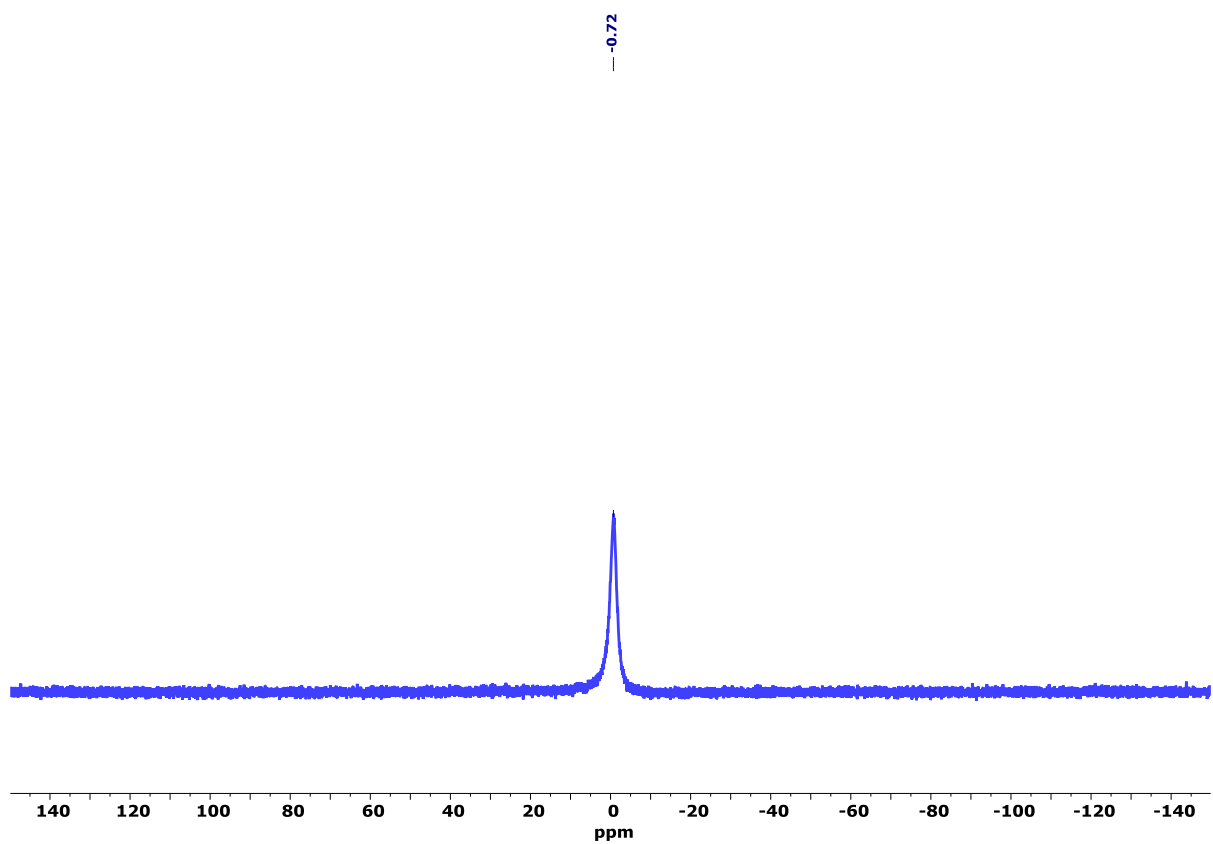

**Figure S30:**  $^{11}\text{B}$ -NMR (128 MHz) spectrum of compound 1 in  $\text{CDCl}_3$

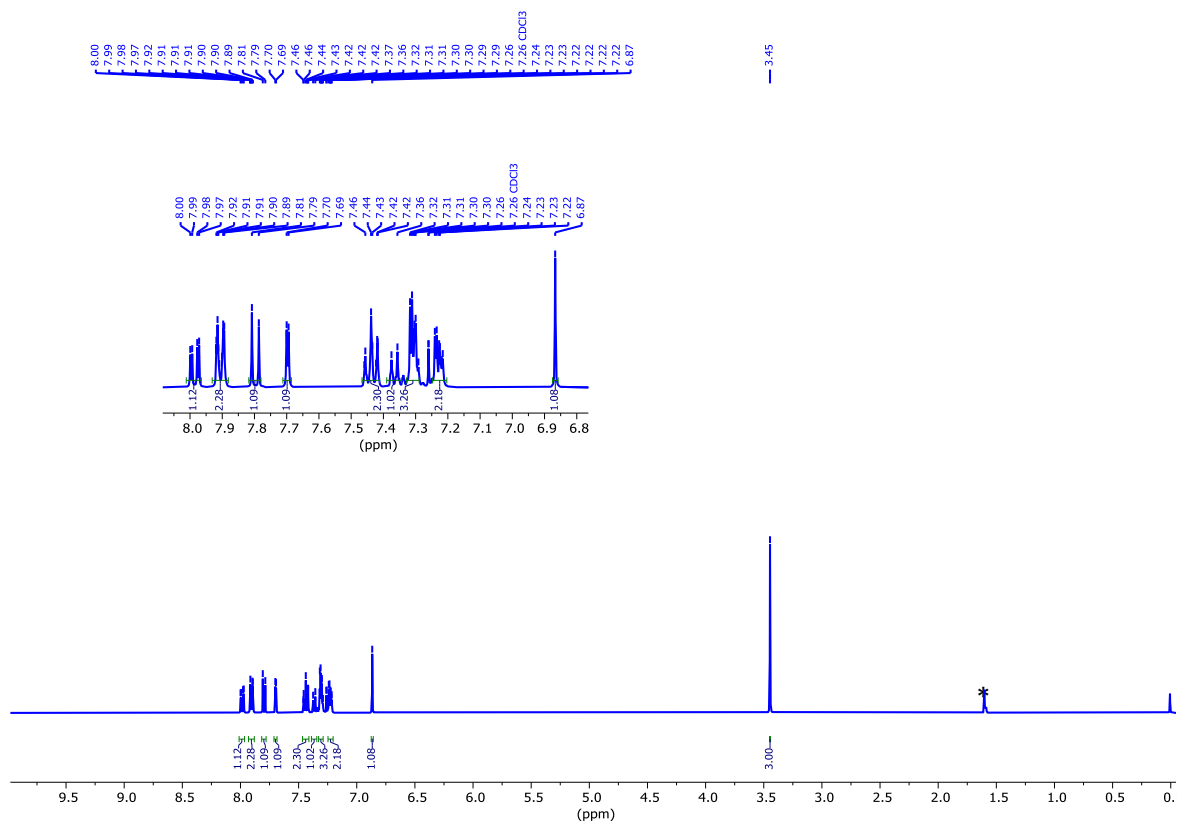

**Figure S31:**  $^1\text{H-NMR}$  (400 MHz) spectrum of compound 2f in  $\text{CDCl}_3$  (\* $\text{H}_2\text{O}$  peak)

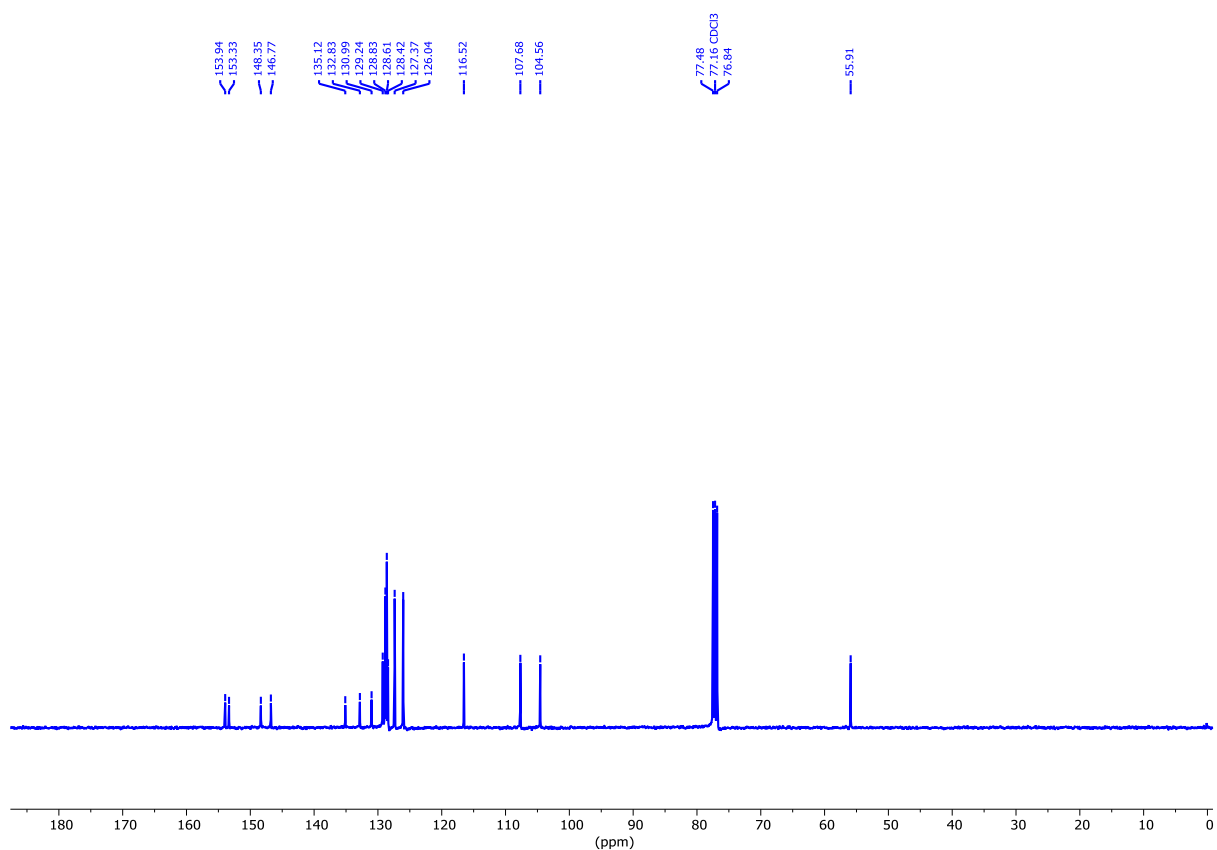

**Figure S32:**  $^{13}\text{C-NMR}$  (101 MHz) spectrum of compound 2f in  $\text{CDCl}_3$

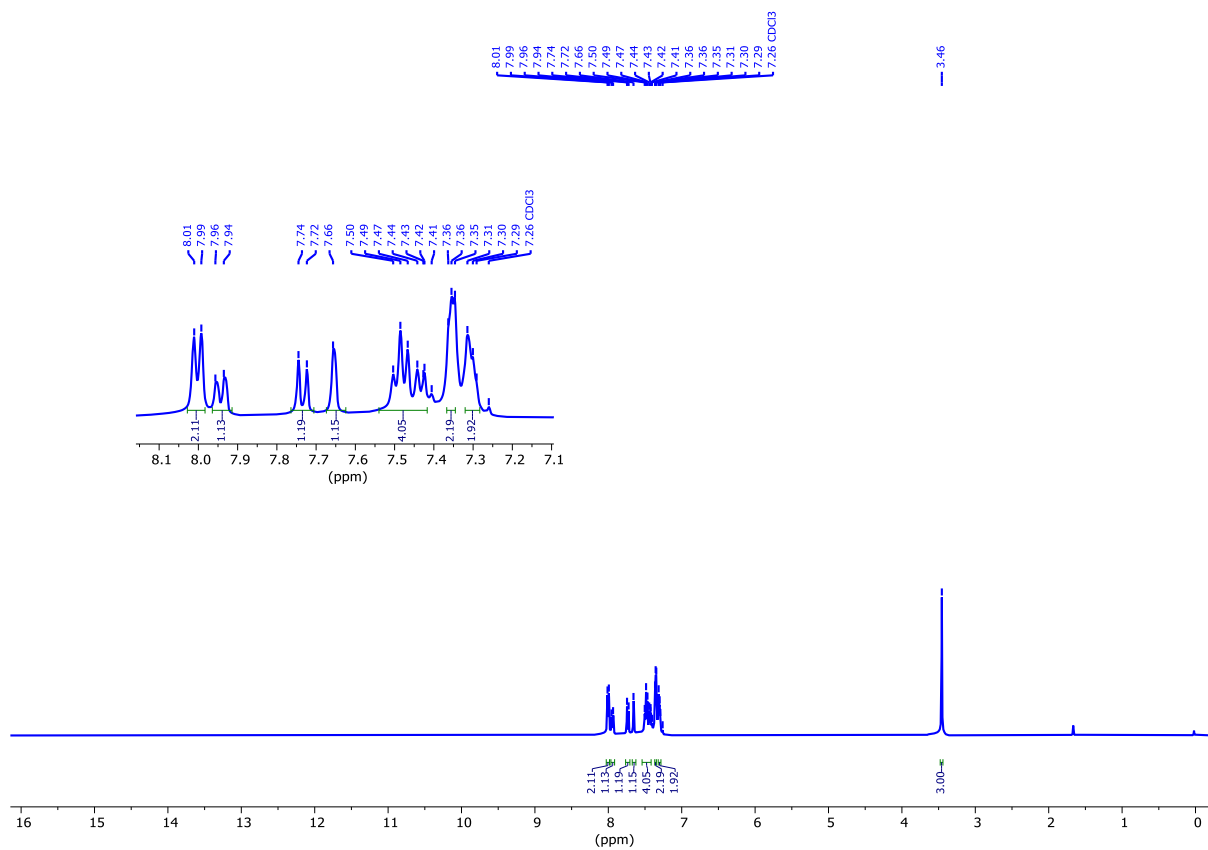

**Figure S33:**  $^1\text{H-NMR}$  (400 MHz) spectrum of compound 2e in  $\text{CDCl}_3$

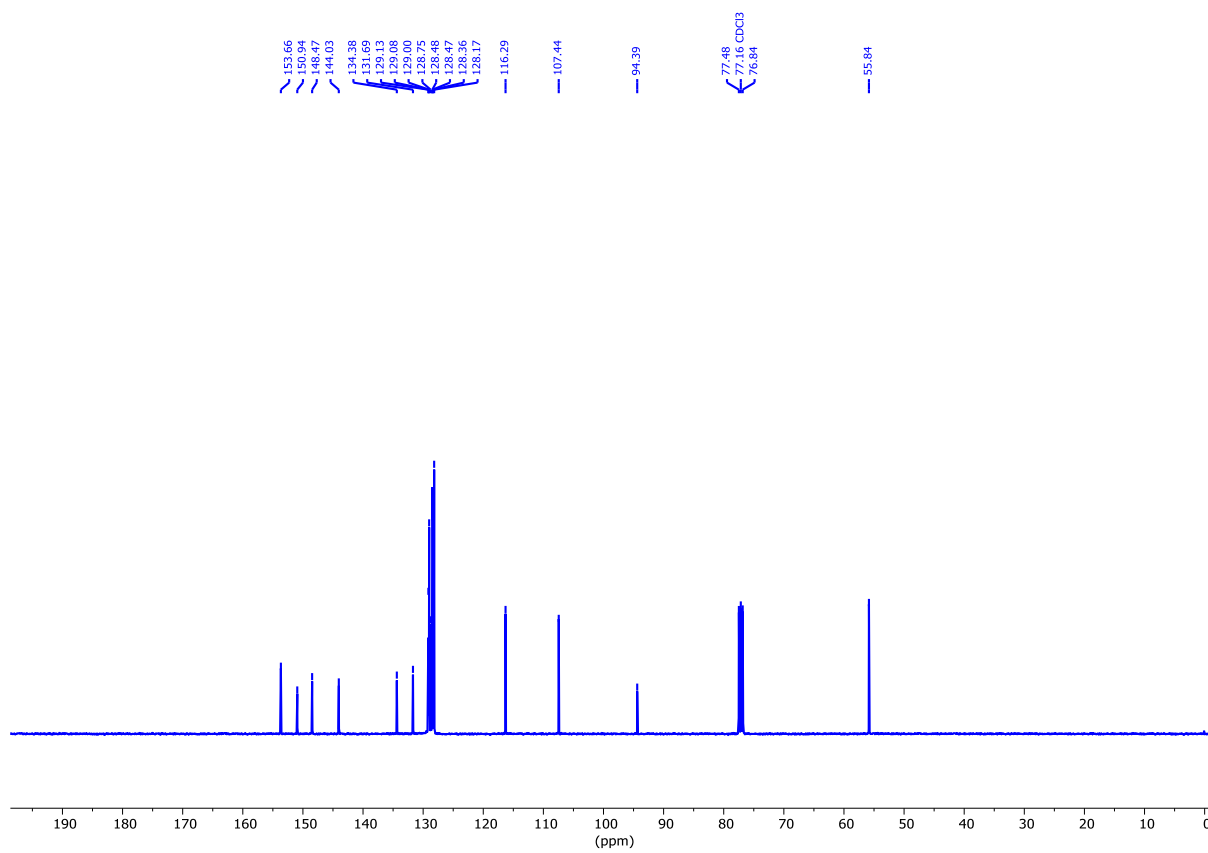

**Figure S34:**  $^{13}\text{C-NMR}$  (101 MHz) spectrum of compound 2e in  $\text{CDCl}_3$

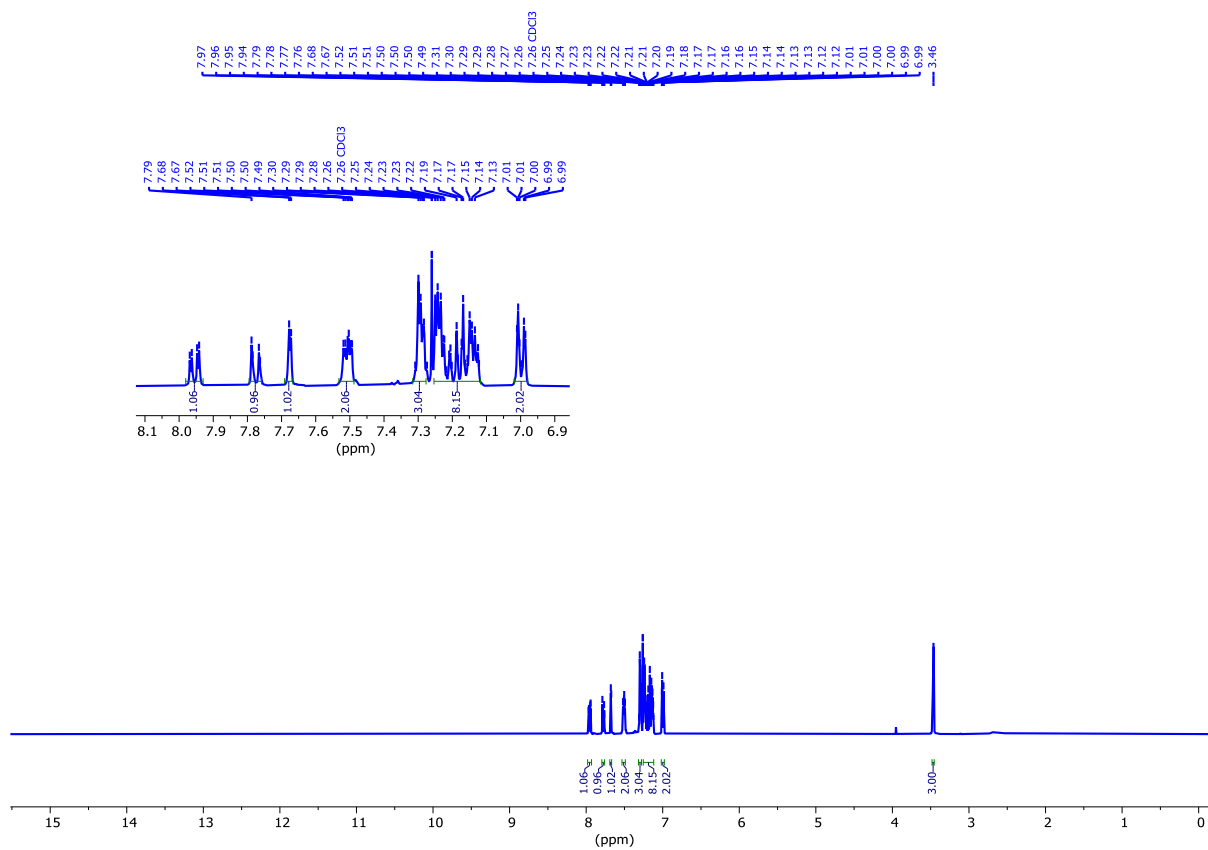

**Figure S35:** <sup>1</sup>H-NMR (400 MHz) spectrum of compound 2d in CDCl<sub>3</sub>

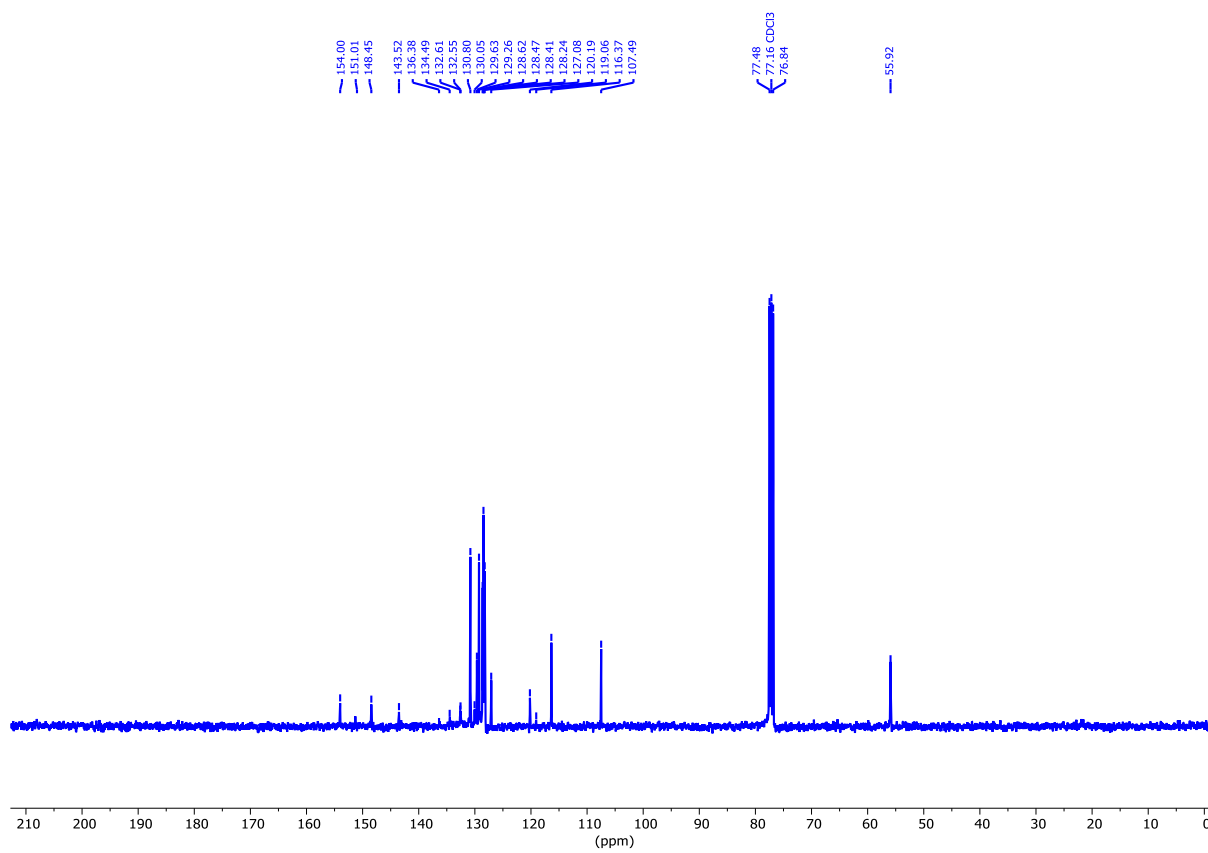

**Figure S36:** <sup>13</sup>C-NMR (101 MHz) spectrum of compound 2d in CDCl<sub>3</sub>



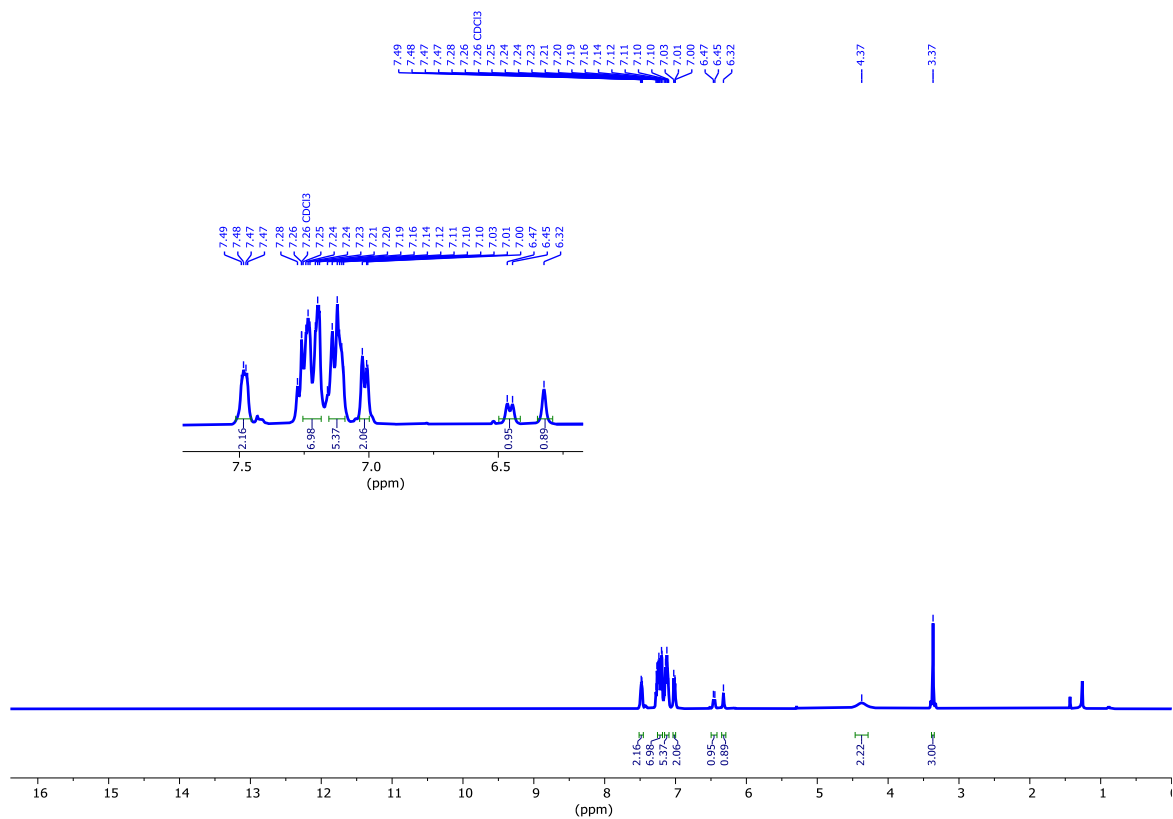

**Figure S37:**  $^1\text{H-NMR}$  (400 MHz) spectrum of compound 2c in  $\text{CDCl}_3$

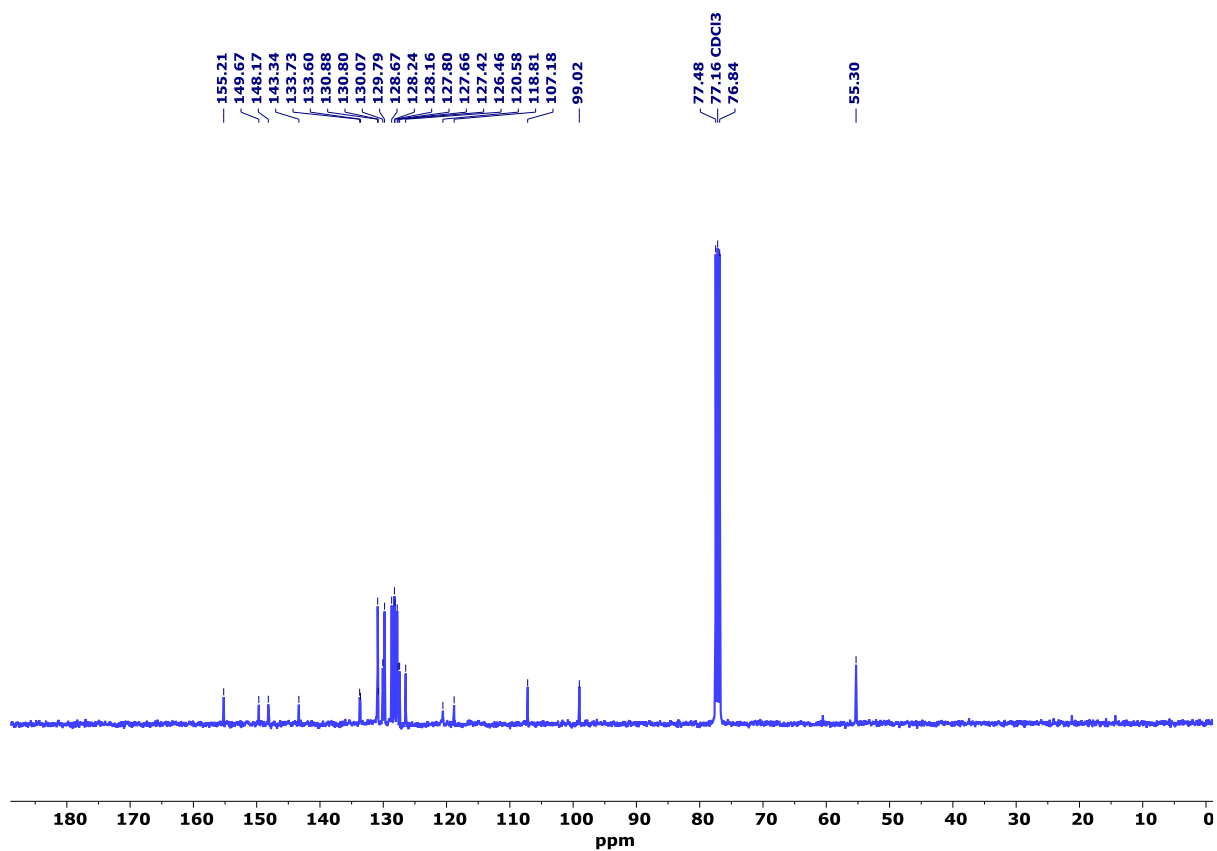

**Figure S38:**  $^{13}\text{C-NMR}$  (101 MHz) spectrum of compound 2c in  $\text{CDCl}_3$

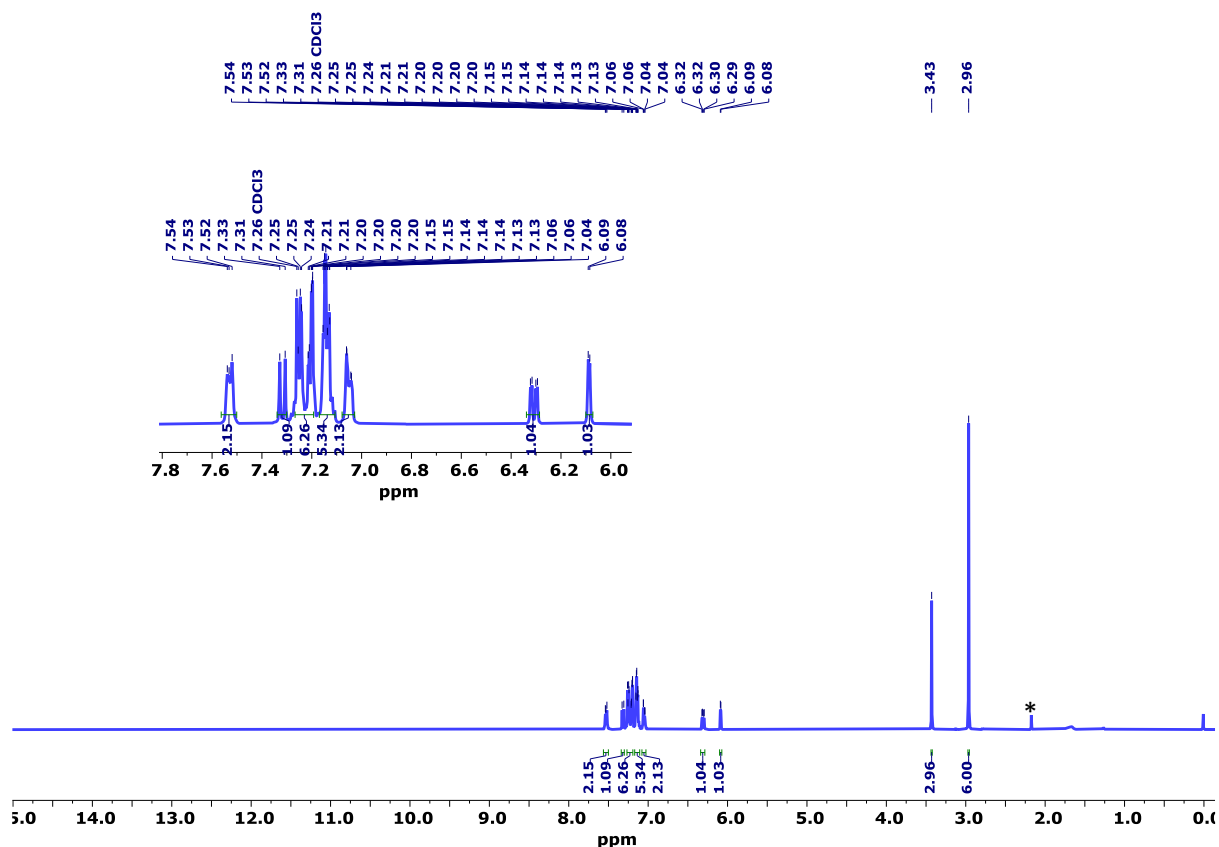

Figure S39:  $^1\text{H-NMR}$  (400 MHz) spectrum of compound 2b in  $\text{CDCl}_3$  (\*Toluene  $-\text{CH}_3$  peak)

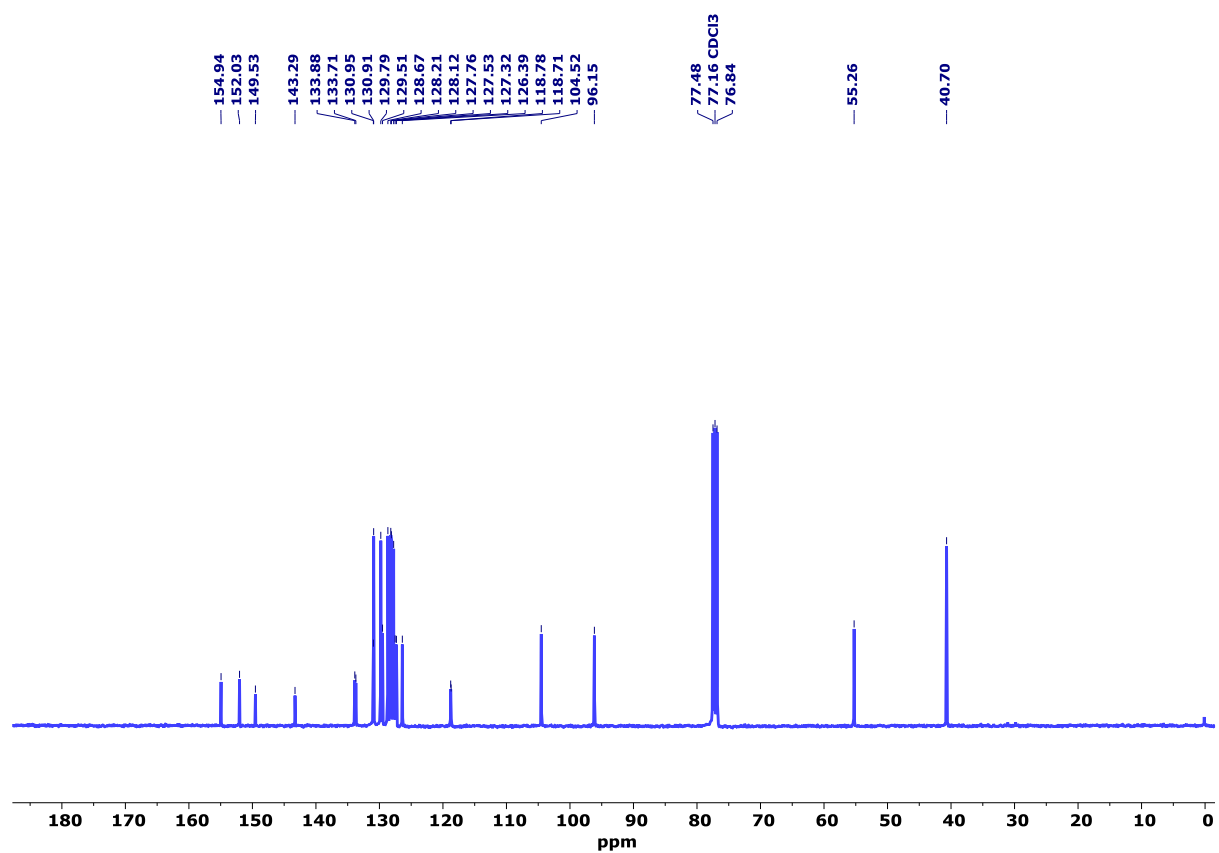

Figure S40:  $^{13}\text{C-NMR}$  (101 MHz) spectrum of compound 2b in  $\text{CDCl}_3$



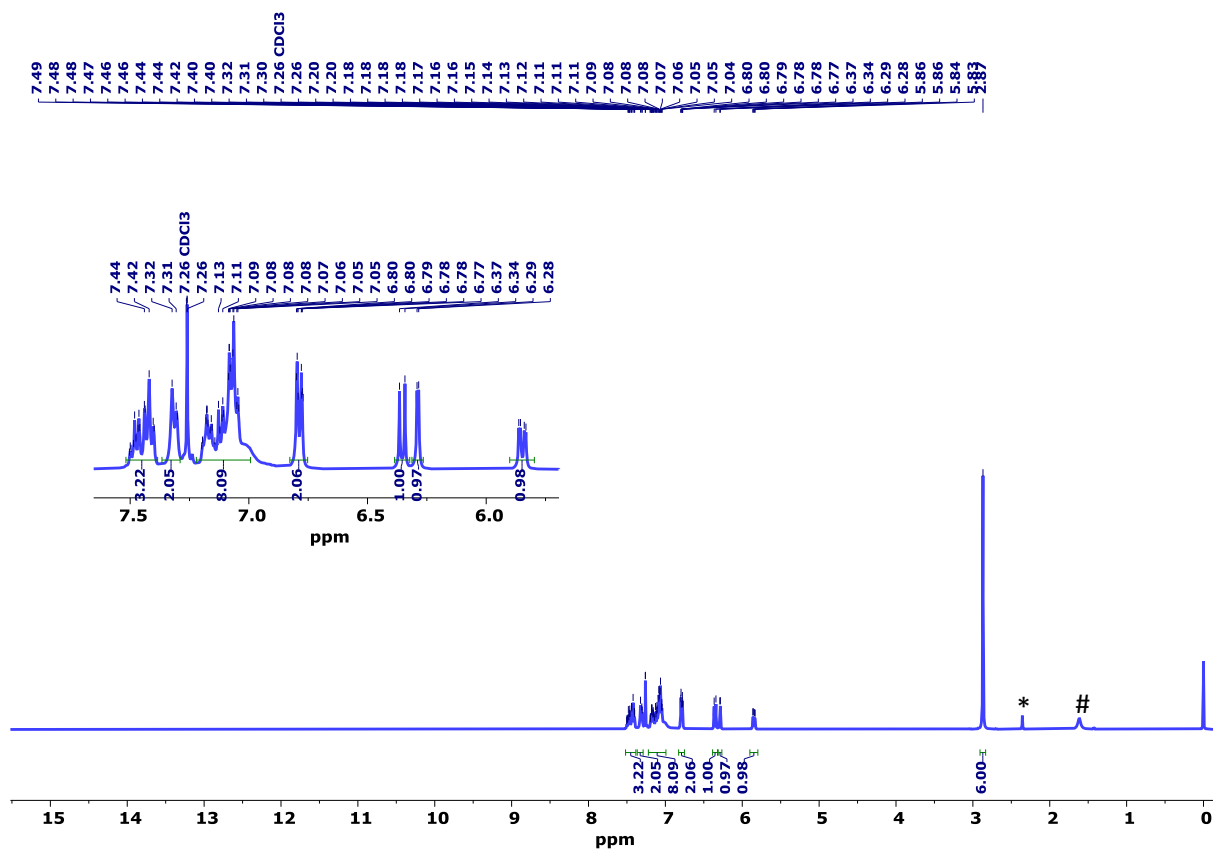

Figure S43:  $^1\text{H-NMR}$  (400 MHz) spectrum of compound 2 in  $\text{CDCl}_3$  (\* Toluene  $-\text{CH}_3$ ) (#  $\text{H}_2\text{O}$ )

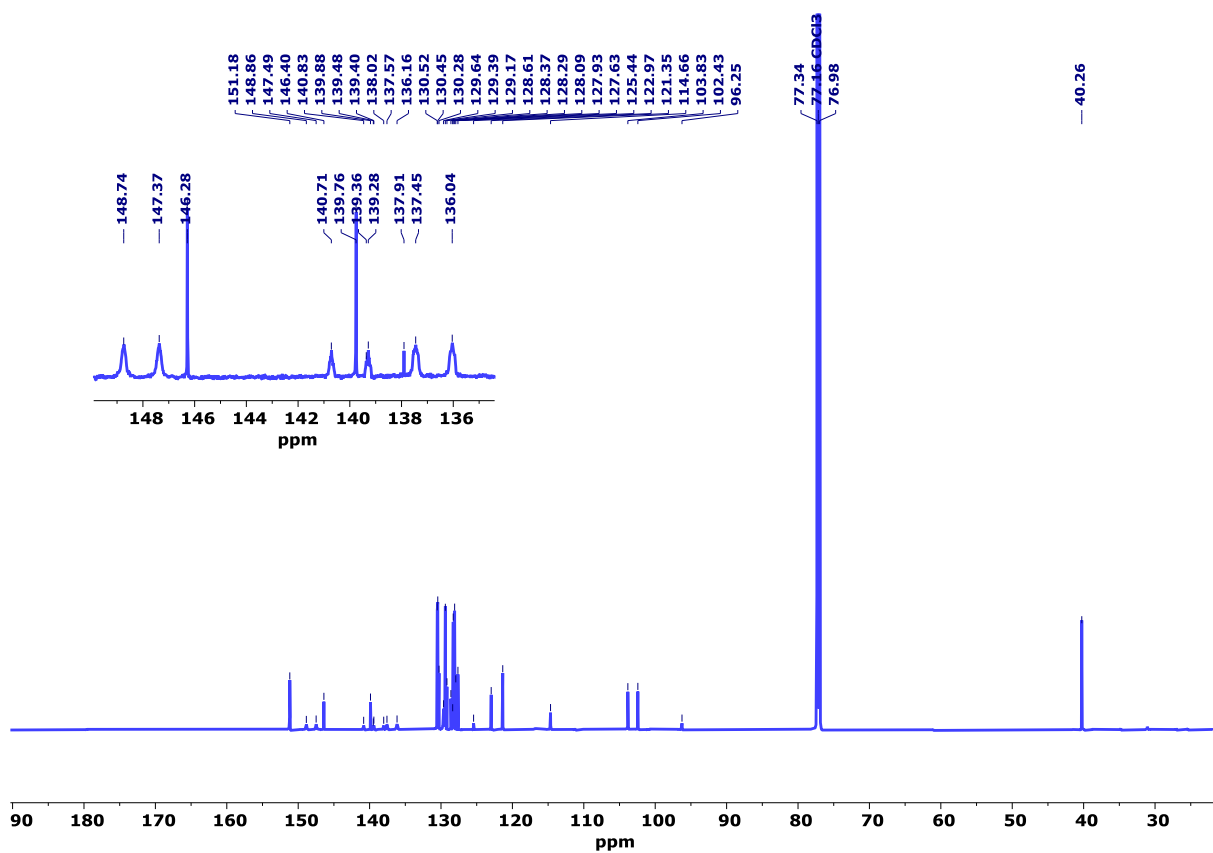

Figure S44:  $^{13}\text{C-NMR}$  (176 MHz) spectrum of compound 2 in  $\text{CDCl}_3$

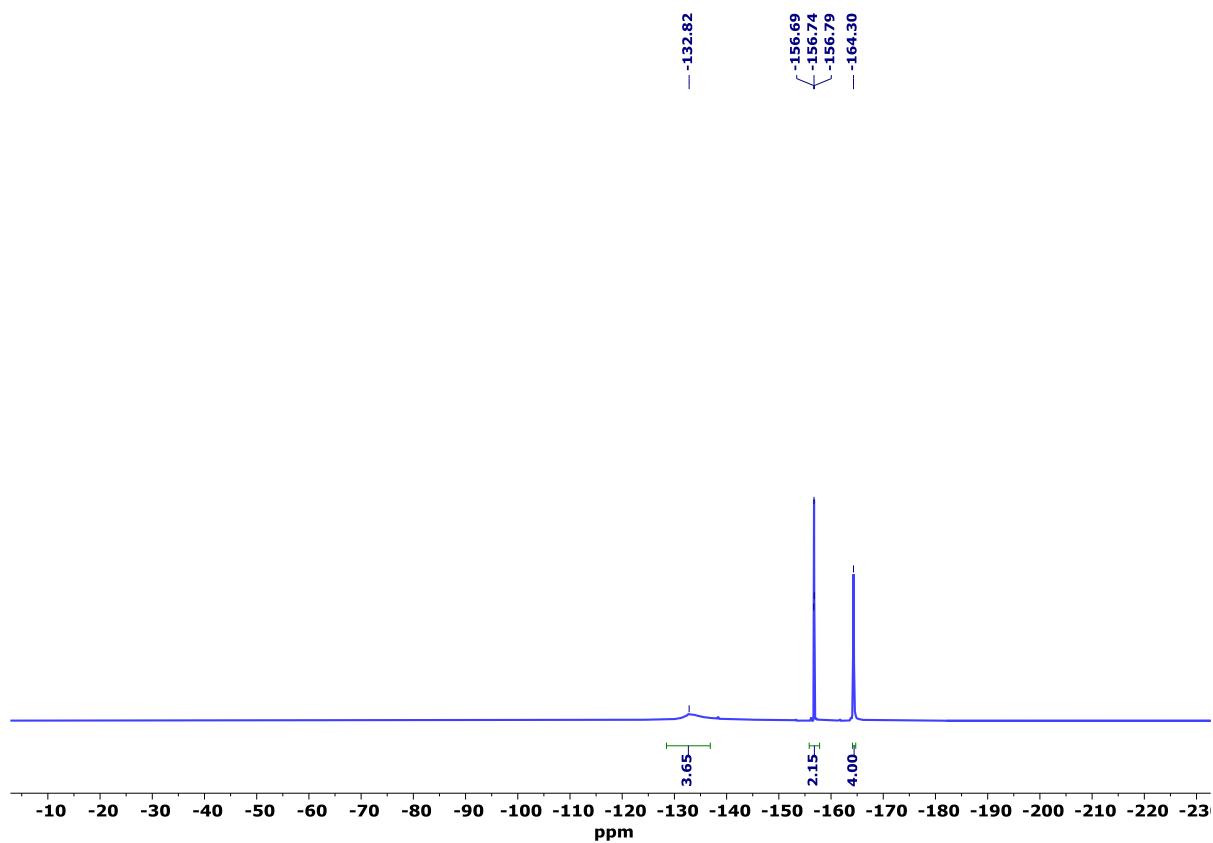

**Figure S45:**  $^{19}\text{F}$ -NMR (376 MHz) spectrum of compound 2 in  $\text{CDCl}_3$

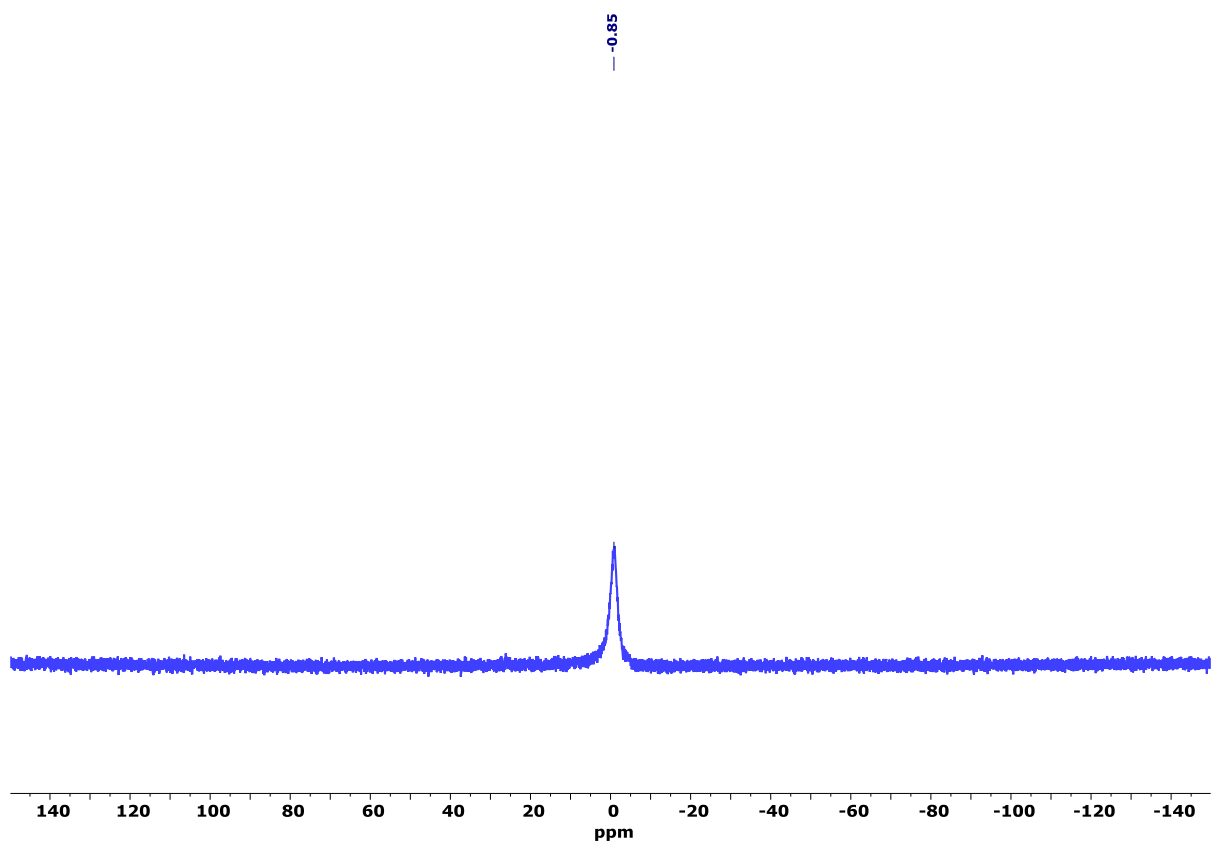

**Figure S46:**  $^{11}\text{B}$ -NMR (128 MHz) spectrum of compound 2 in  $\text{CDCl}_3$

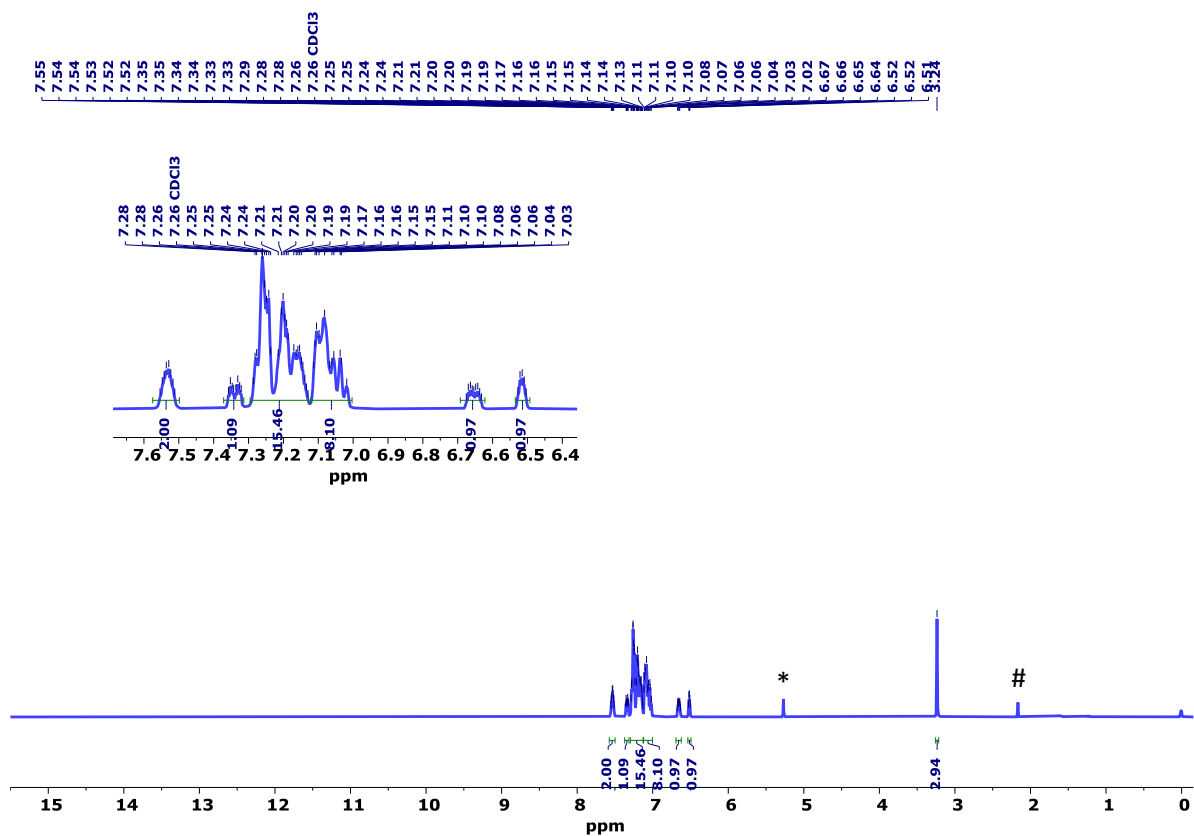

**Figure S47:** <sup>1</sup>H-NMR (400 MHz) spectrum of compound 3b in CDCl<sub>3</sub> (\*CH<sub>2</sub>Cl<sub>2</sub> peak & #H<sub>2</sub>O peak)

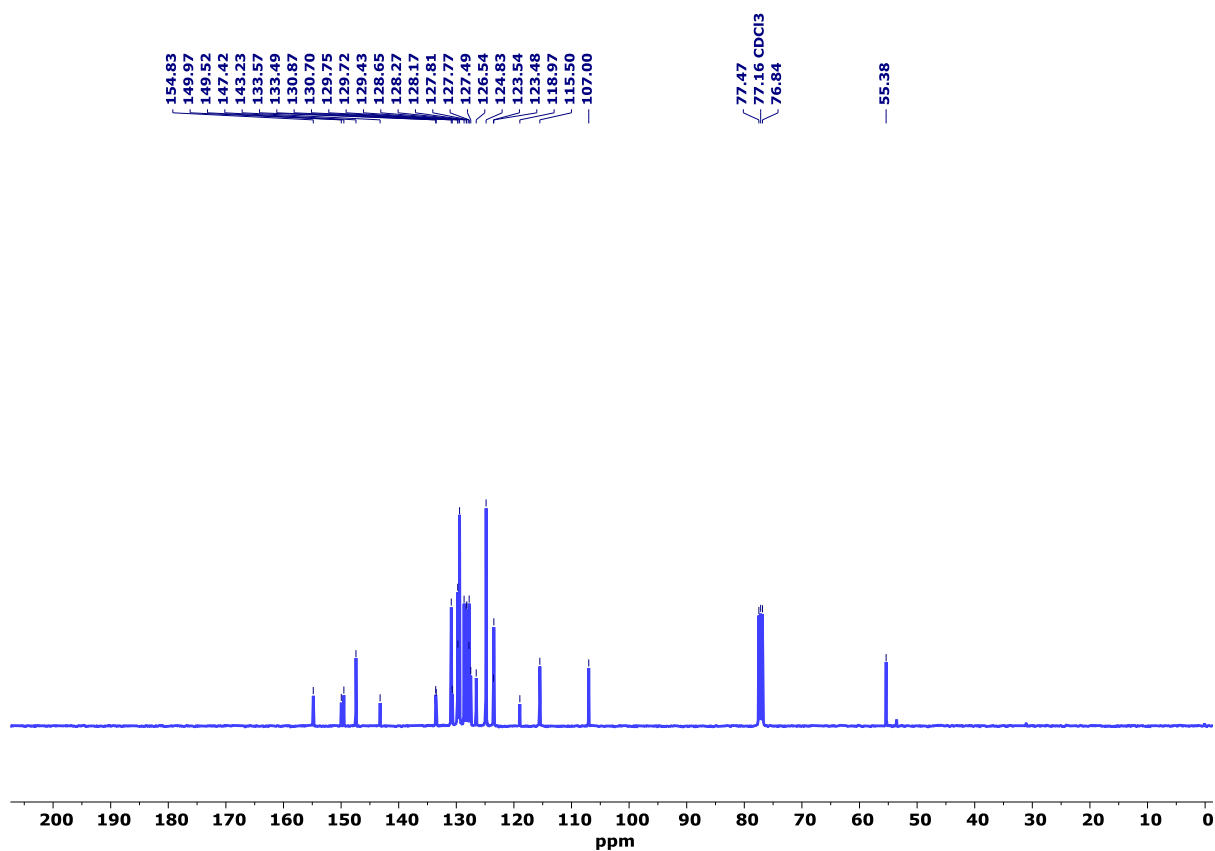

**Figure S48:** <sup>13</sup>C-NMR (101 MHz) spectrum of compound 3b in CDCl<sub>3</sub>

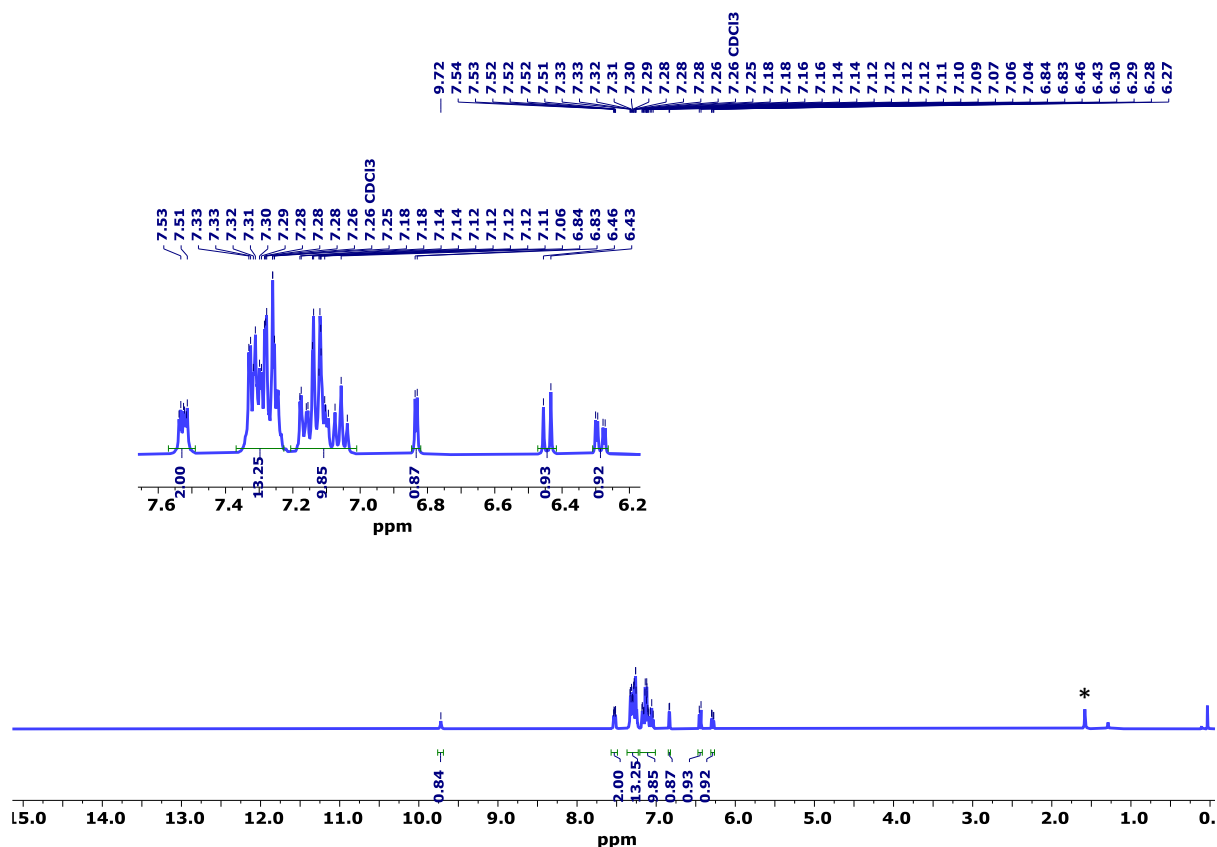

Figure S49:  $^1\text{H-NMR}$  (400 MHz) spectrum of compound 3a in  $\text{CDCl}_3$  (\*  $\text{H}_2\text{O}$  peak)

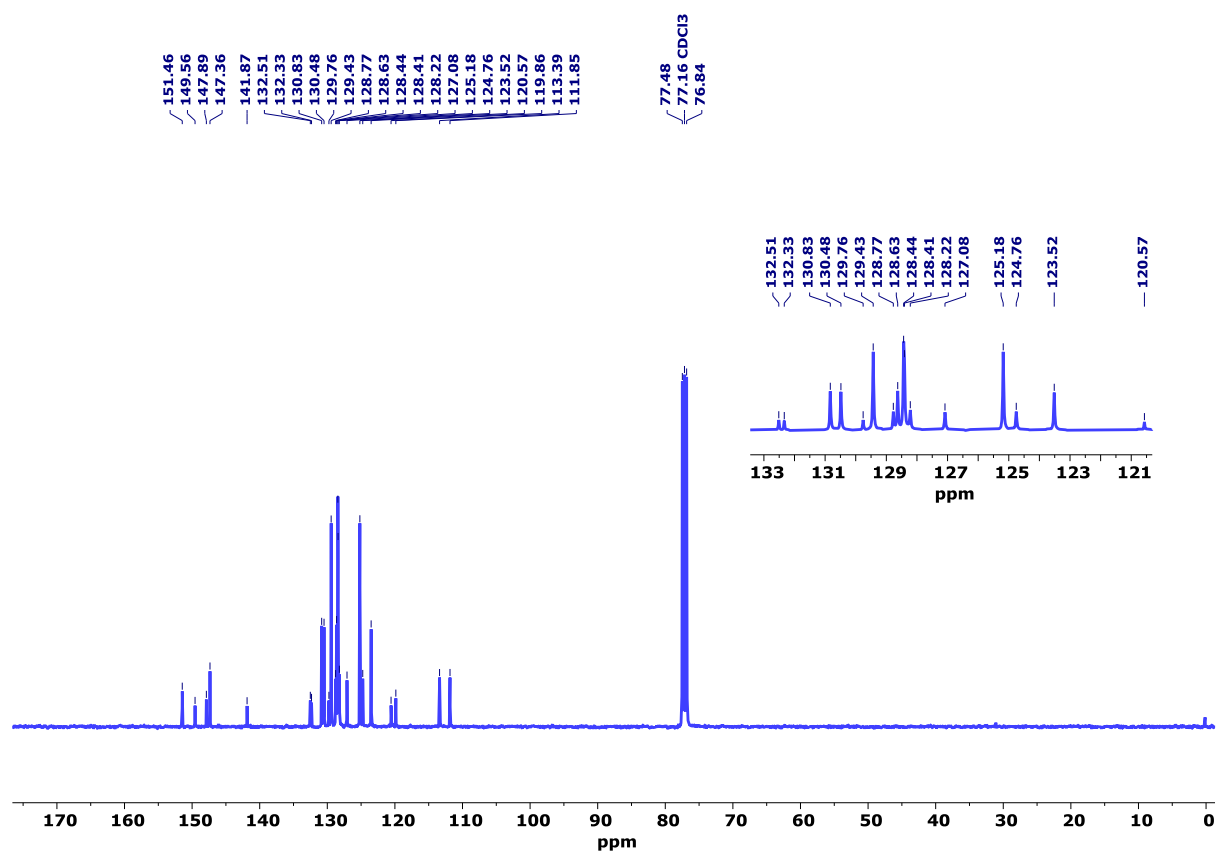

Figure S50:  $^{13}\text{C-NMR}$  (101 MHz) spectrum of compound 3a in  $\text{CDCl}_3$

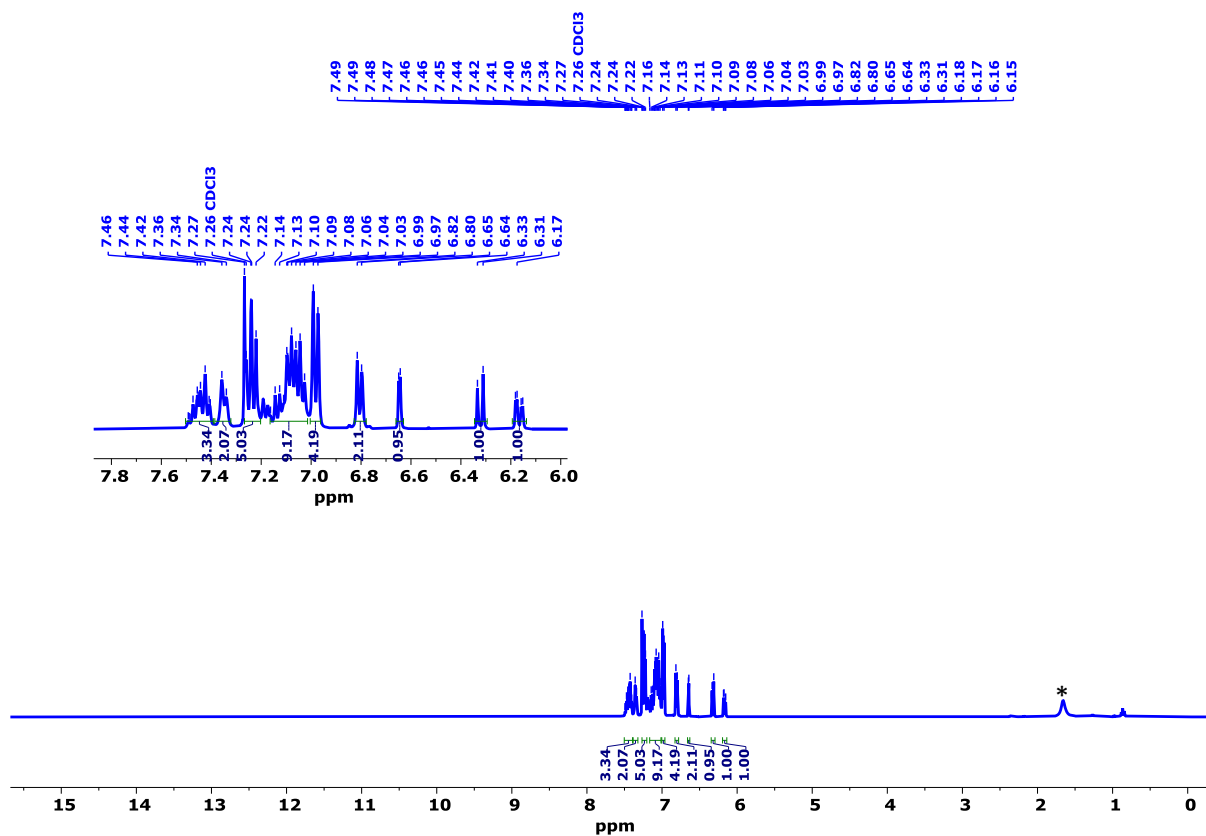

Figure S51:  $^1\text{H-NMR}$  (400 MHz) spectrum of compound 3 in  $\text{CDCl}_3$  (\*  $\text{H}_2\text{O}$  peak)

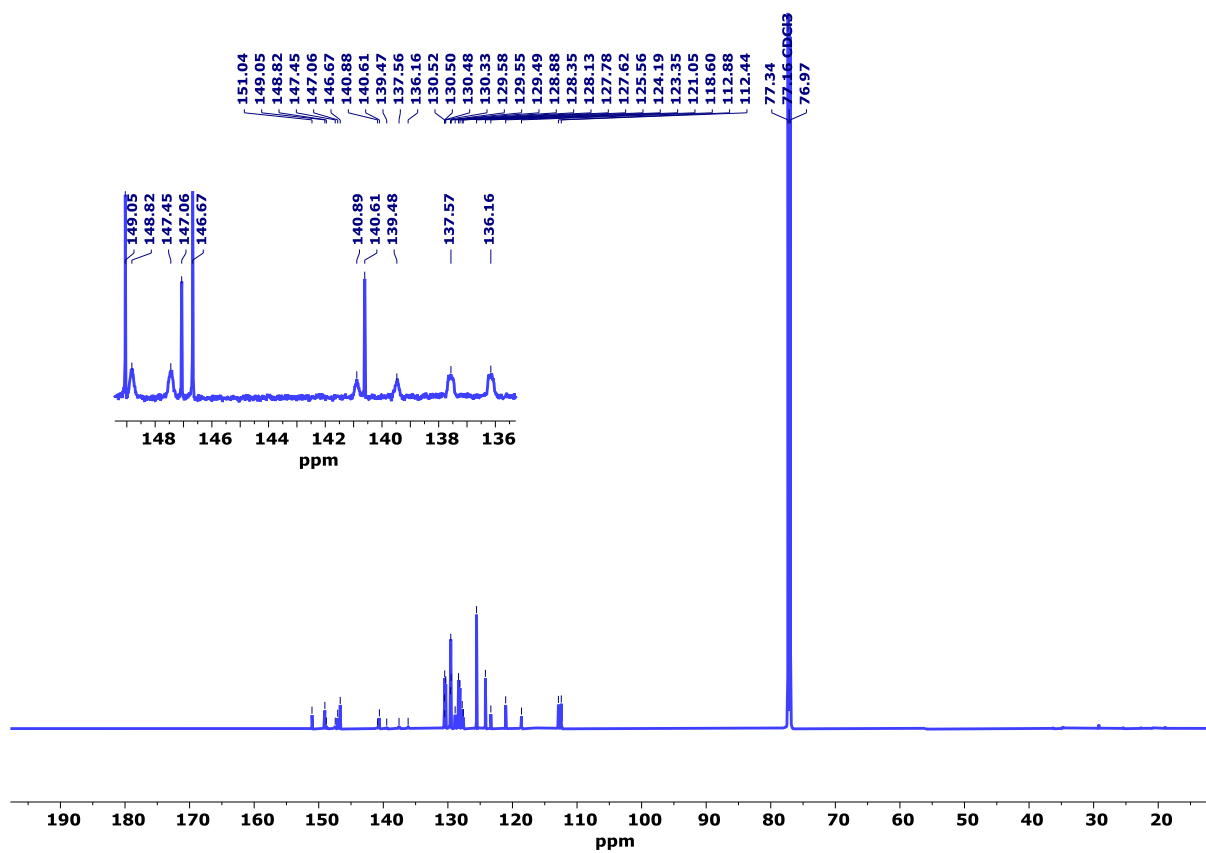

Figure S52:  $^{13}\text{C-NMR}$  (176 MHz) spectrum of compound 3 in  $\text{CDCl}_3$



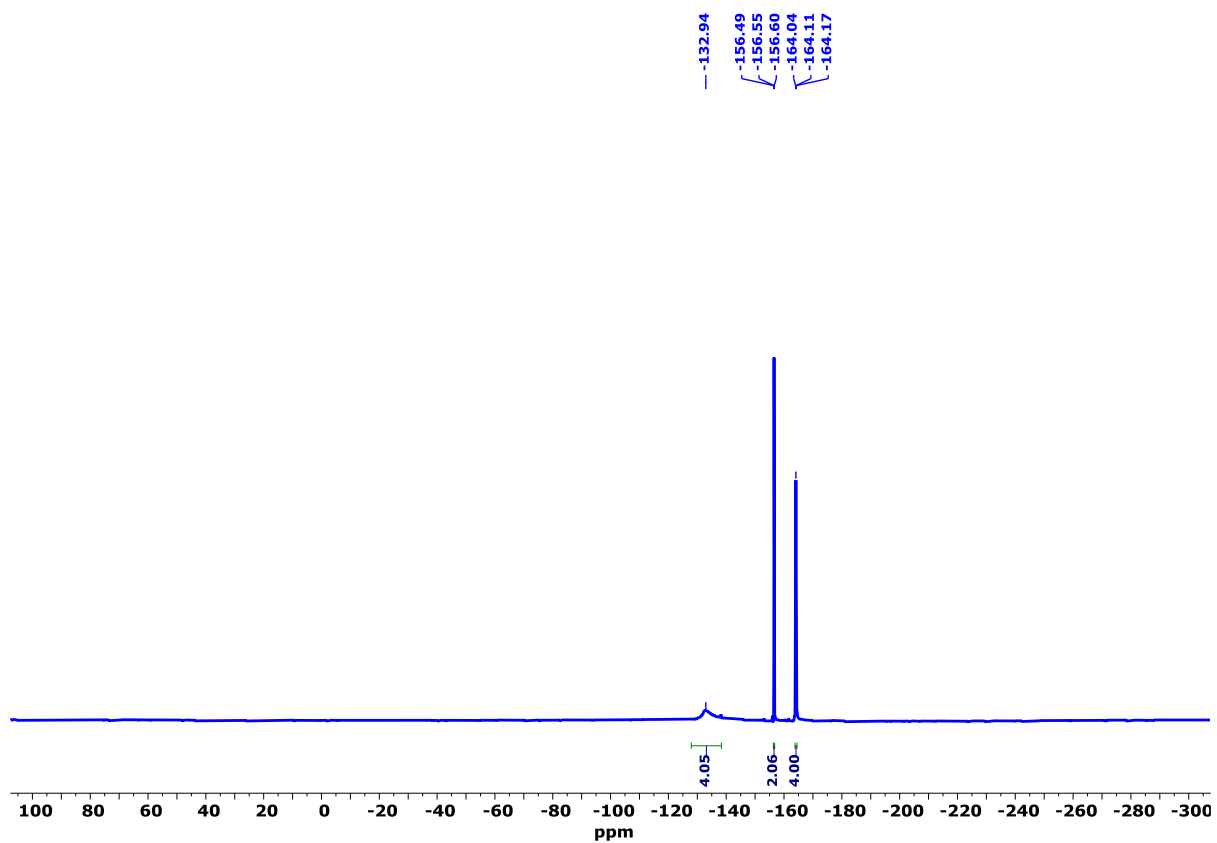

**Figure S53:**  $^{19}\text{F}$ -NMR (376 MHz) spectrum of compound 3 in  $\text{CDCl}_3$

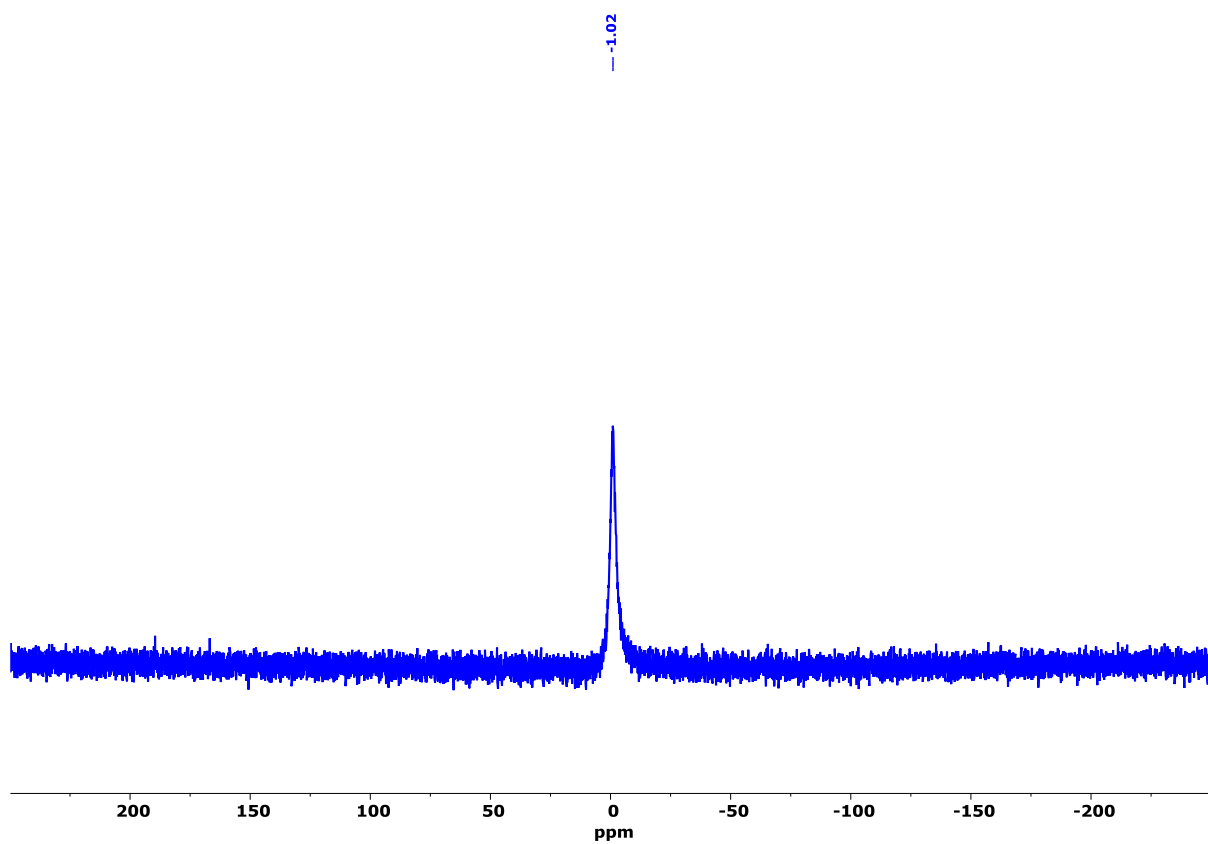

**Figure S54:**  $^{11}\text{B}$ -NMR (128 MHz) spectrum of compound 3 in  $\text{CDCl}_3$

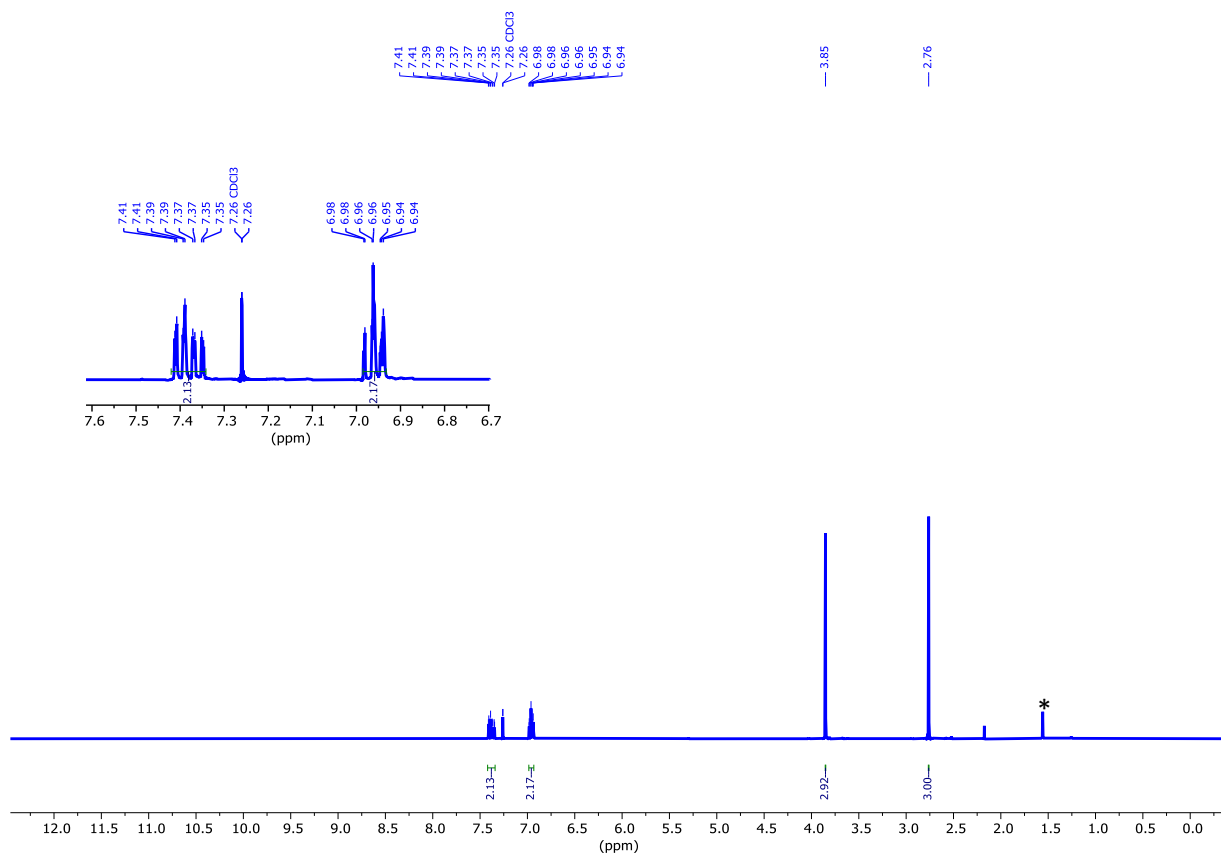

**Figure S55:** <sup>1</sup>H-NMR (400 MHz) spectrum of compound 4f in CDCl<sub>3</sub> (\*H<sub>2</sub>O peak)

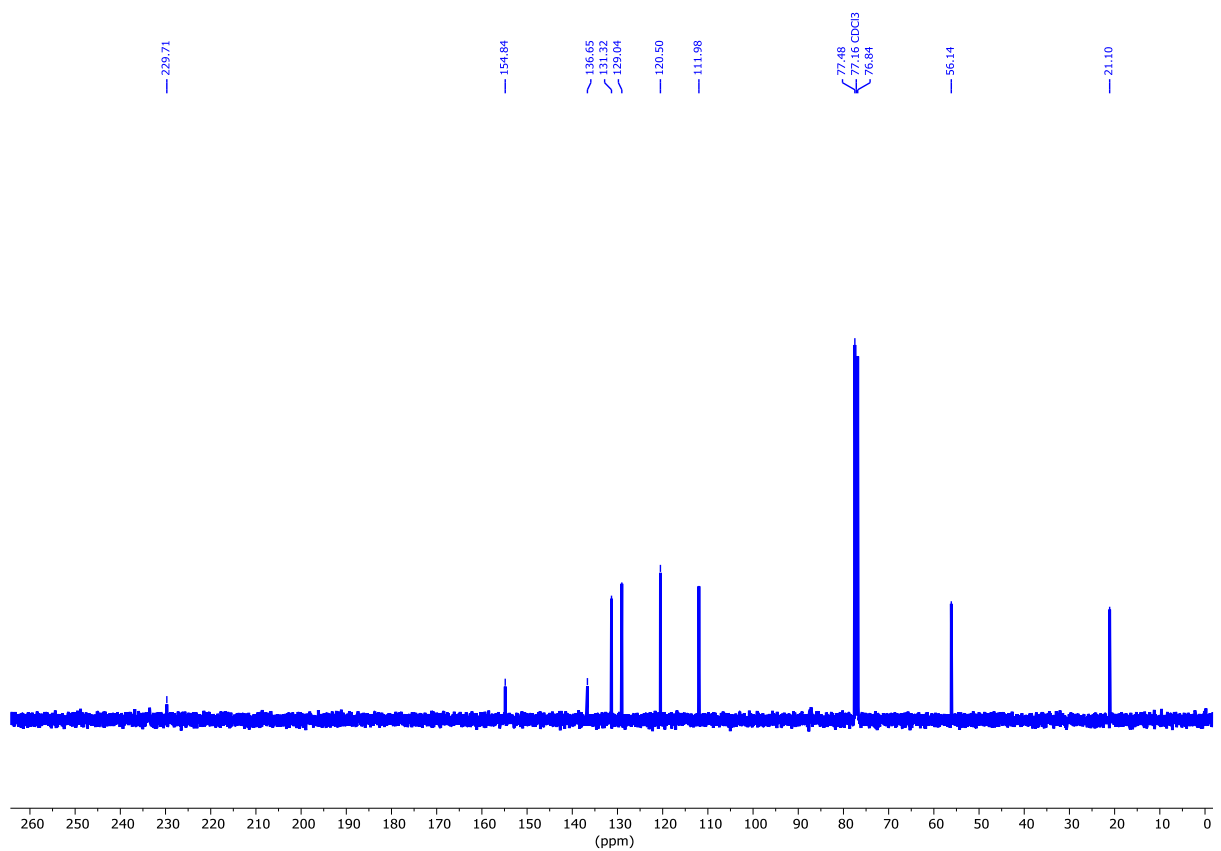

**Figure S56:** <sup>13</sup>C-NMR (101 MHz) spectrum of compound 4f in CDCl<sub>3</sub>

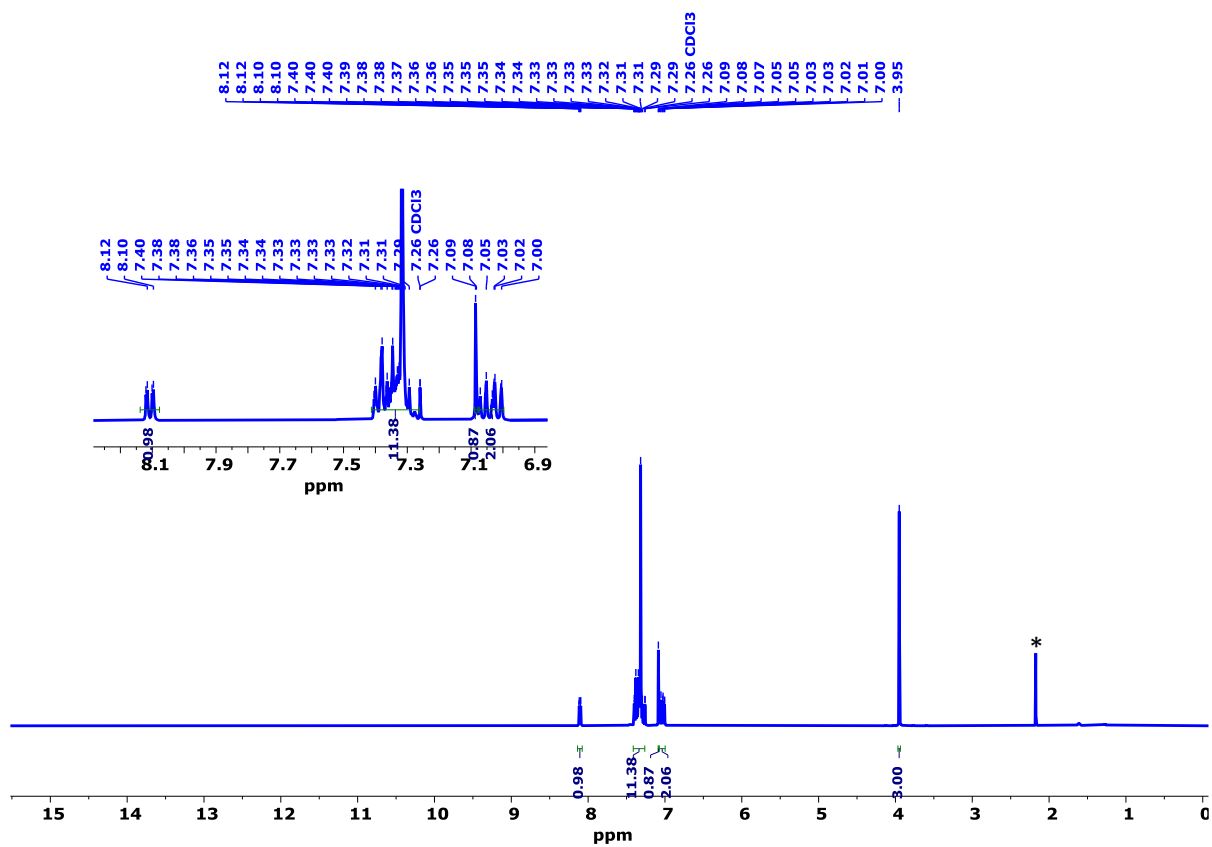

Figure S57:  $^1\text{H-NMR}$  (400 MHz) spectrum of compound 4d in  $\text{CDCl}_3$  (\*Acetone peak)

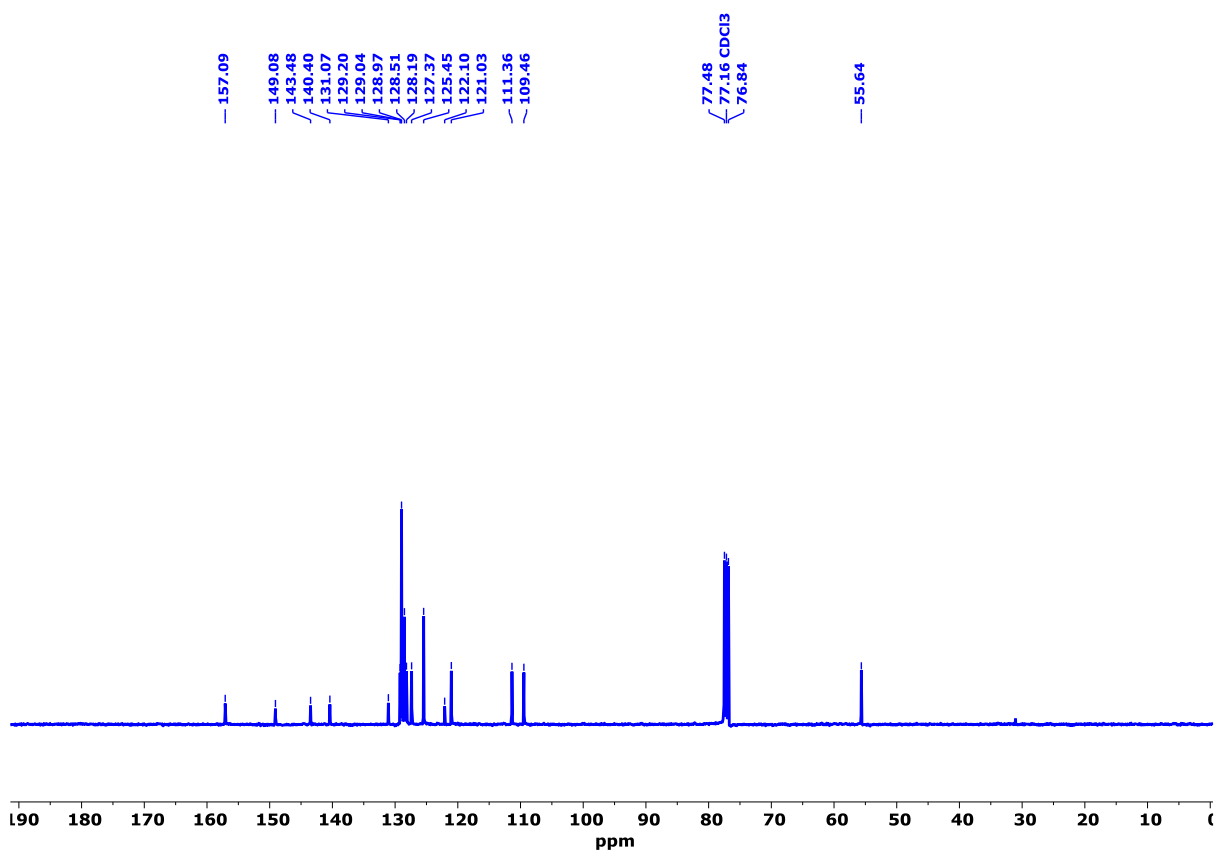

Figure S58:  $^{13}\text{C-NMR}$  (101 MHz) spectrum of compound 4d in  $\text{CDCl}_3$

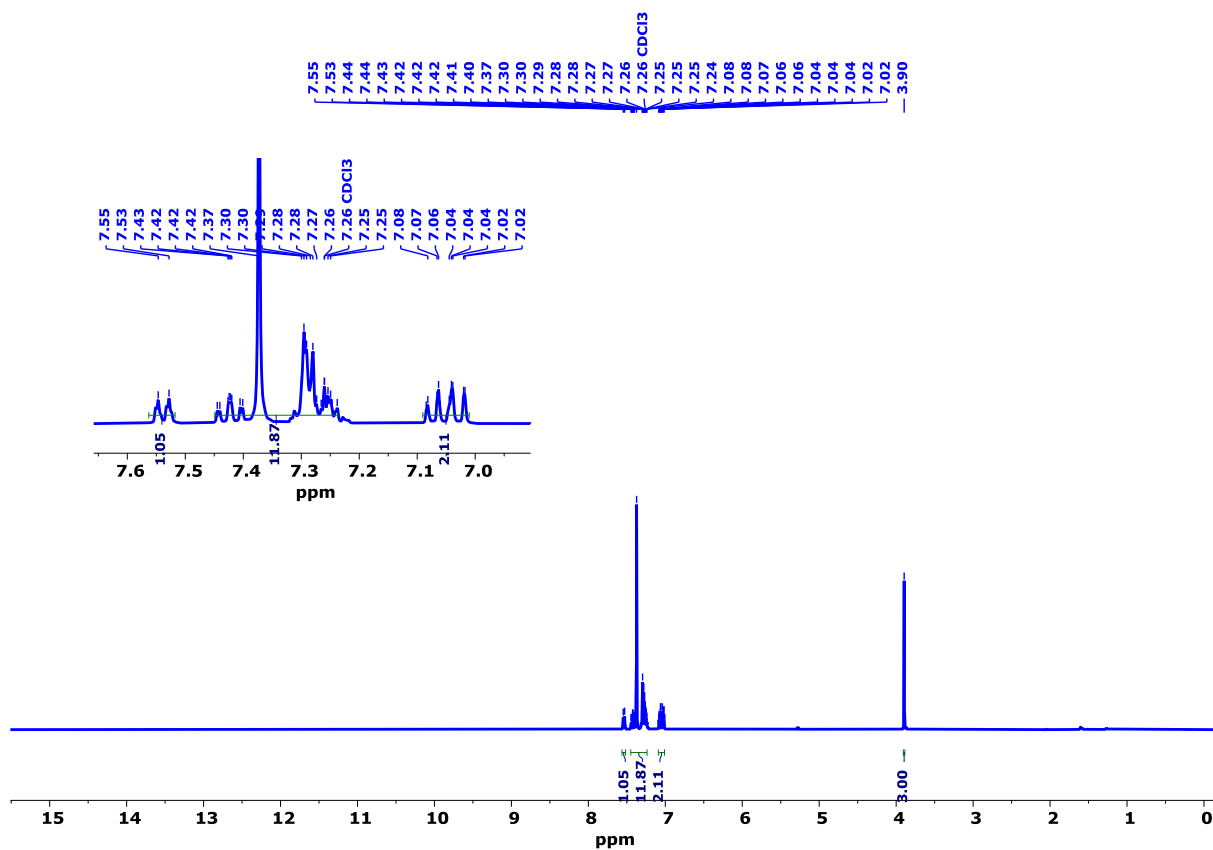

Figure S59:  $^1\text{H-NMR}$  (400 MHz) spectrum of compound 4c in  $\text{CDCl}_3$

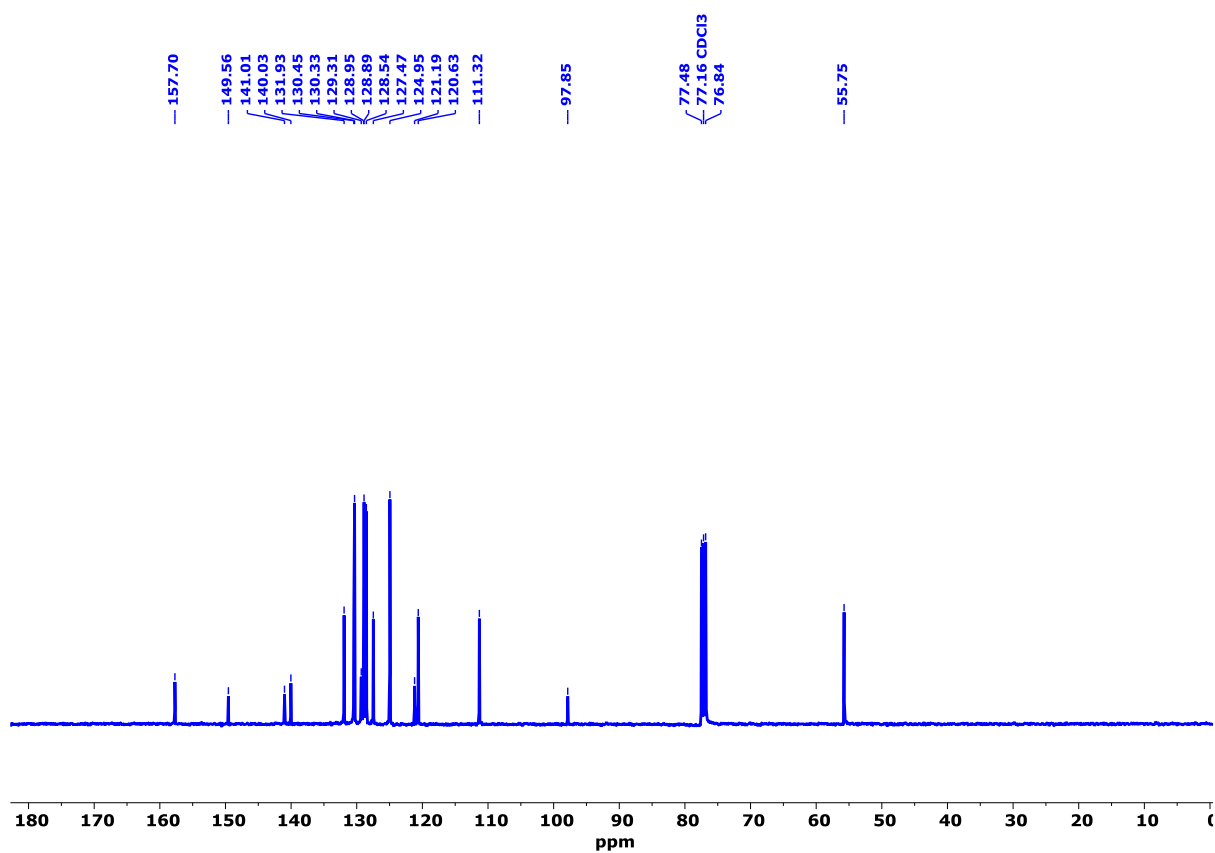

Figure S60:  $^{13}\text{C-NMR}$  (101 MHz) spectrum of compound 4c in  $\text{CDCl}_3$

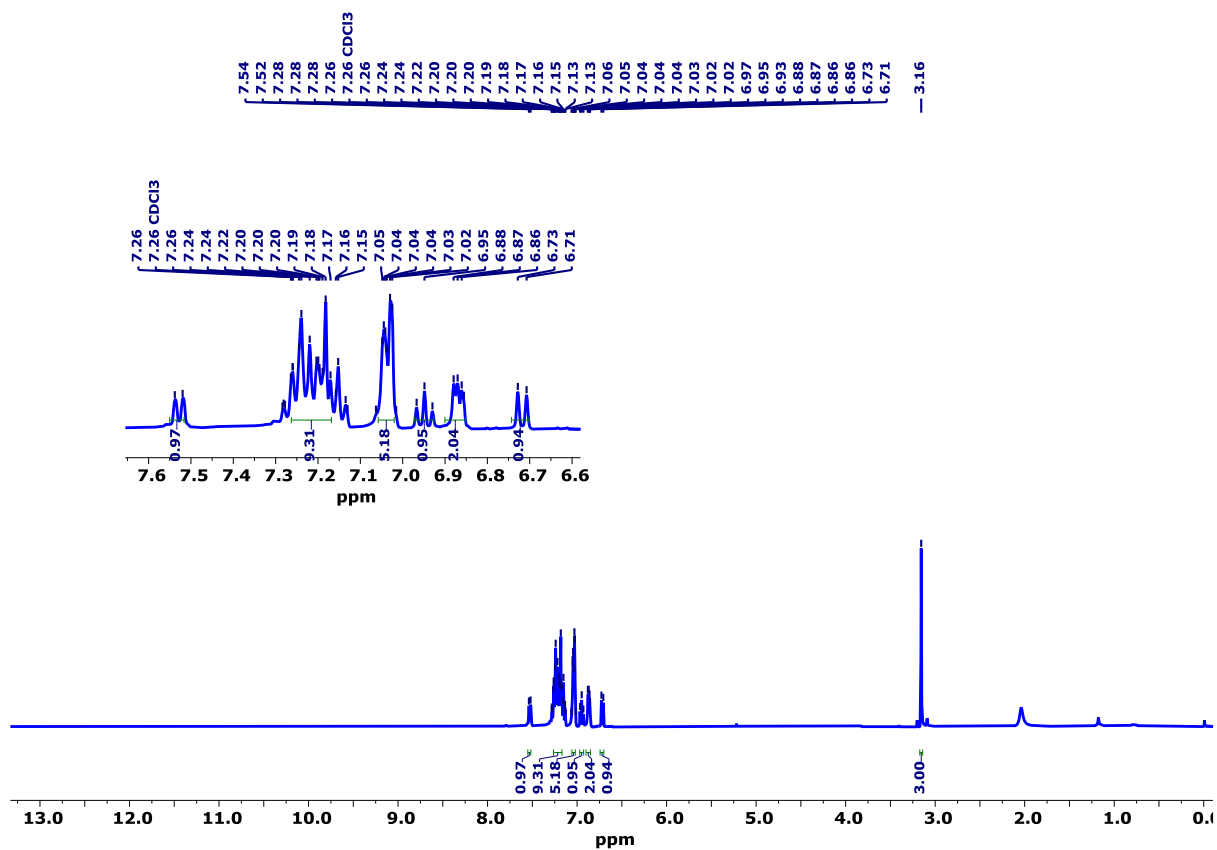

Figure S61:  $^1\text{H-NMR}$  (400 MHz) spectrum of compound 4b in  $\text{CDCl}_3$

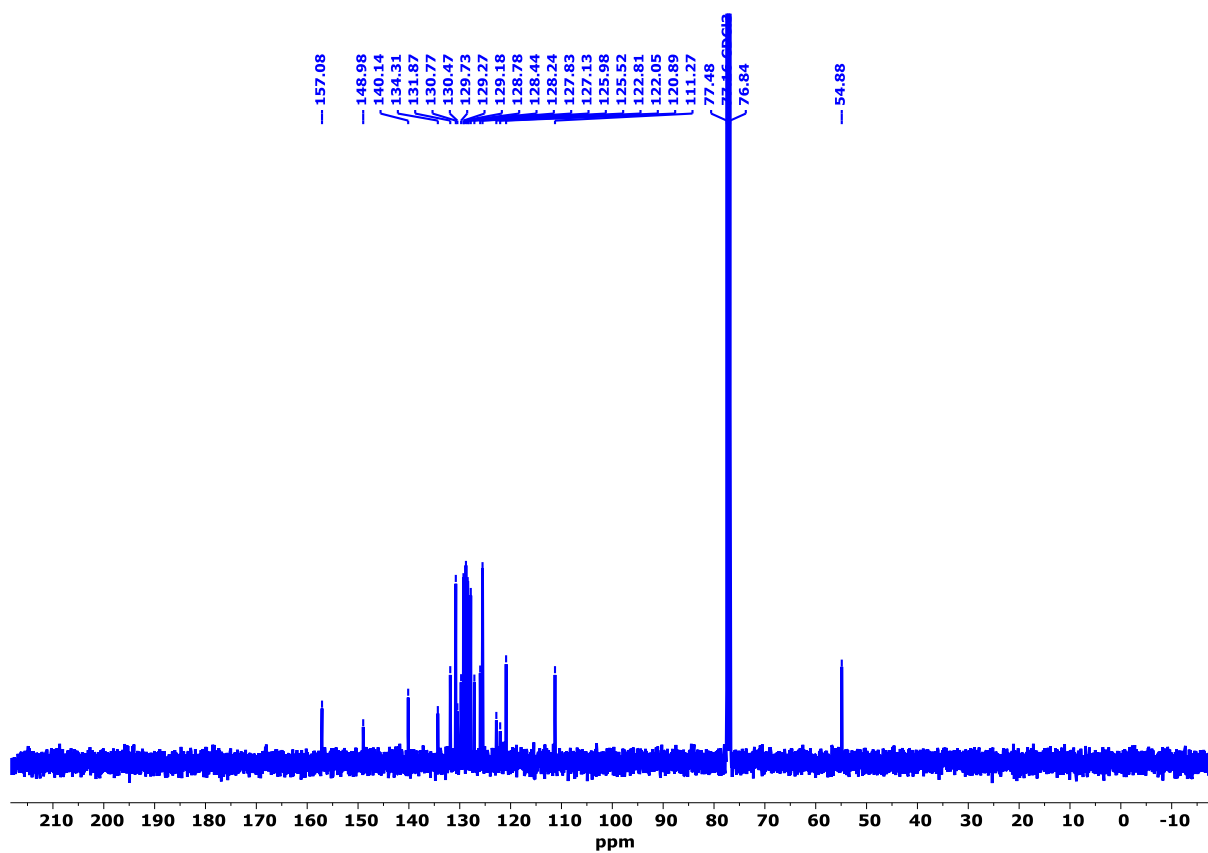

Figure S62:  $^{13}\text{C-NMR}$  (101 MHz) spectrum of compound 4b in  $\text{CDCl}_3$

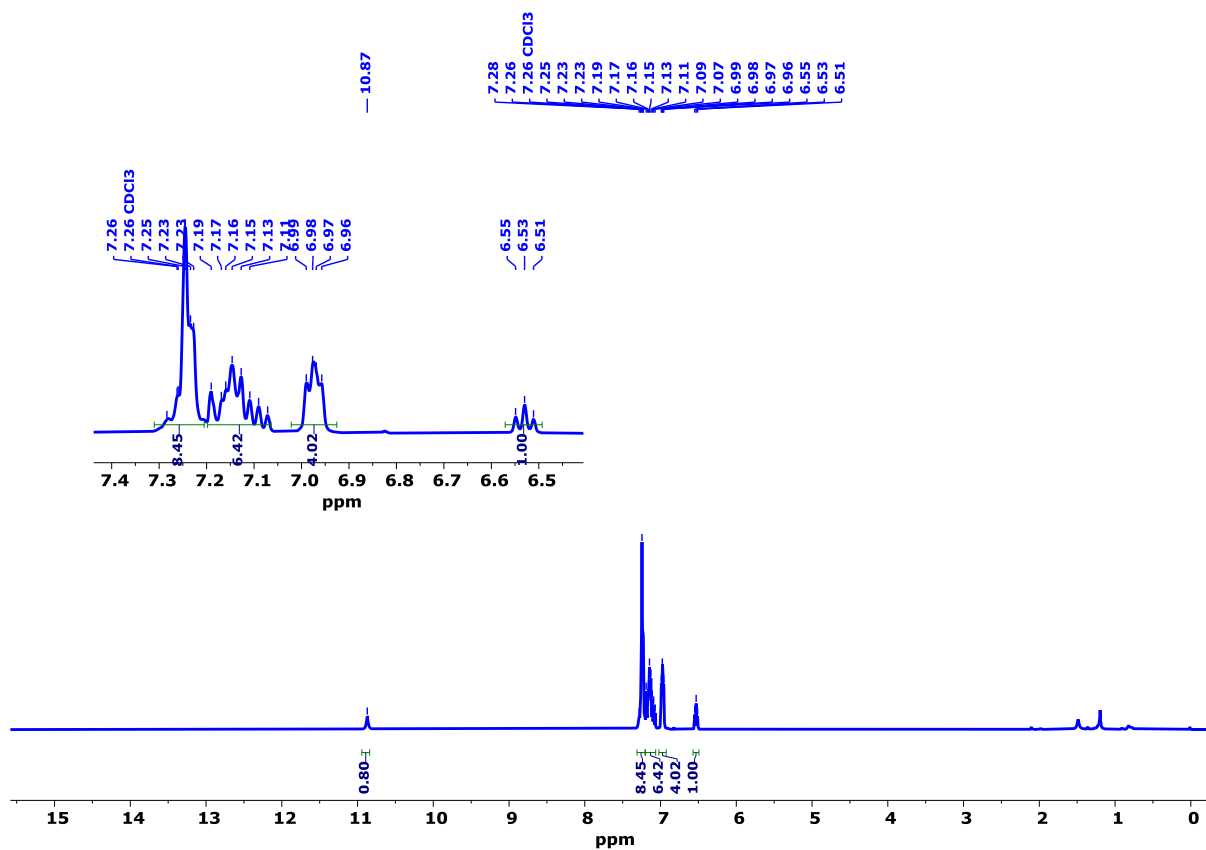

Figure S63:  $^1\text{H-NMR}$  (400 MHz) spectrum of compound 4a in  $\text{CDCl}_3$

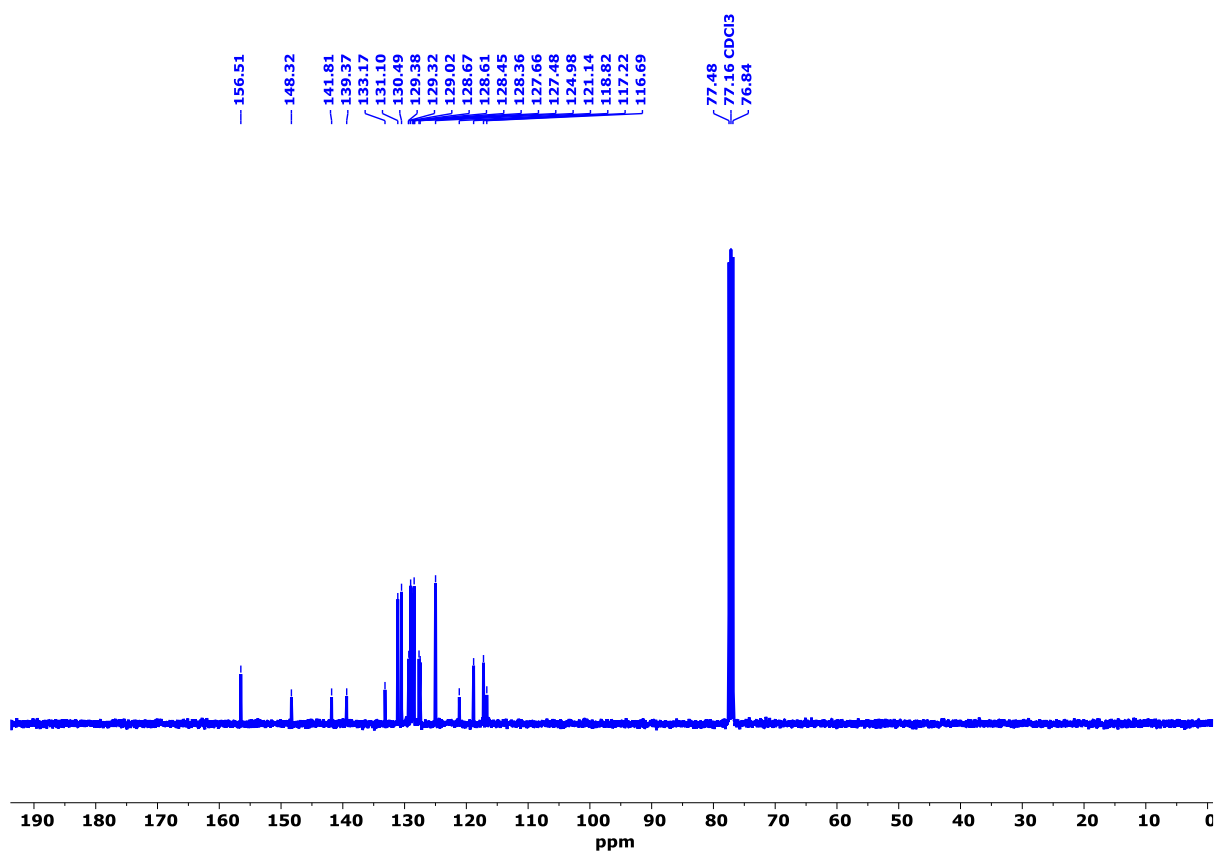

Figure S64:  $^{13}\text{C-NMR}$  (101 MHz) spectrum of compound 4a in  $\text{CDCl}_3$

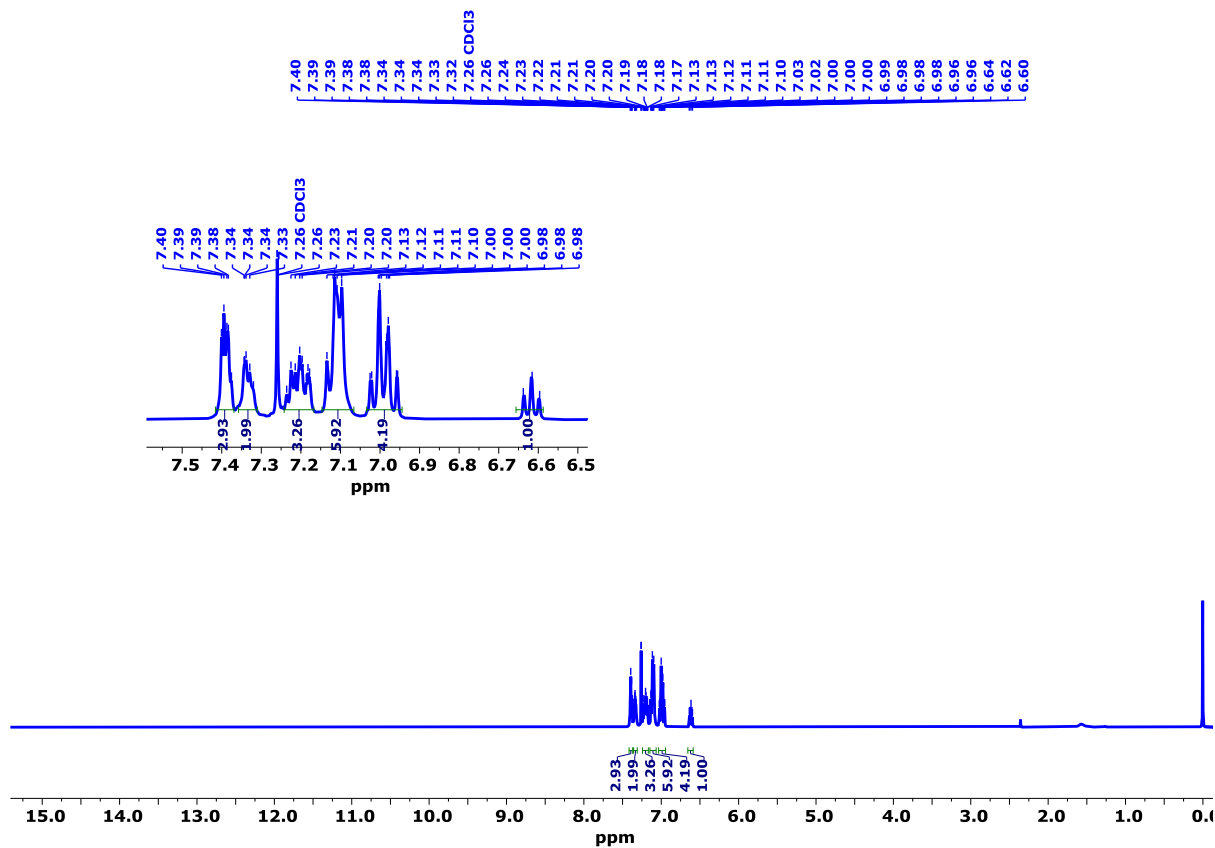

Figure S65: <sup>1</sup>H-NMR (400 MHz) spectrum of compound 4 in CDCl<sub>3</sub>

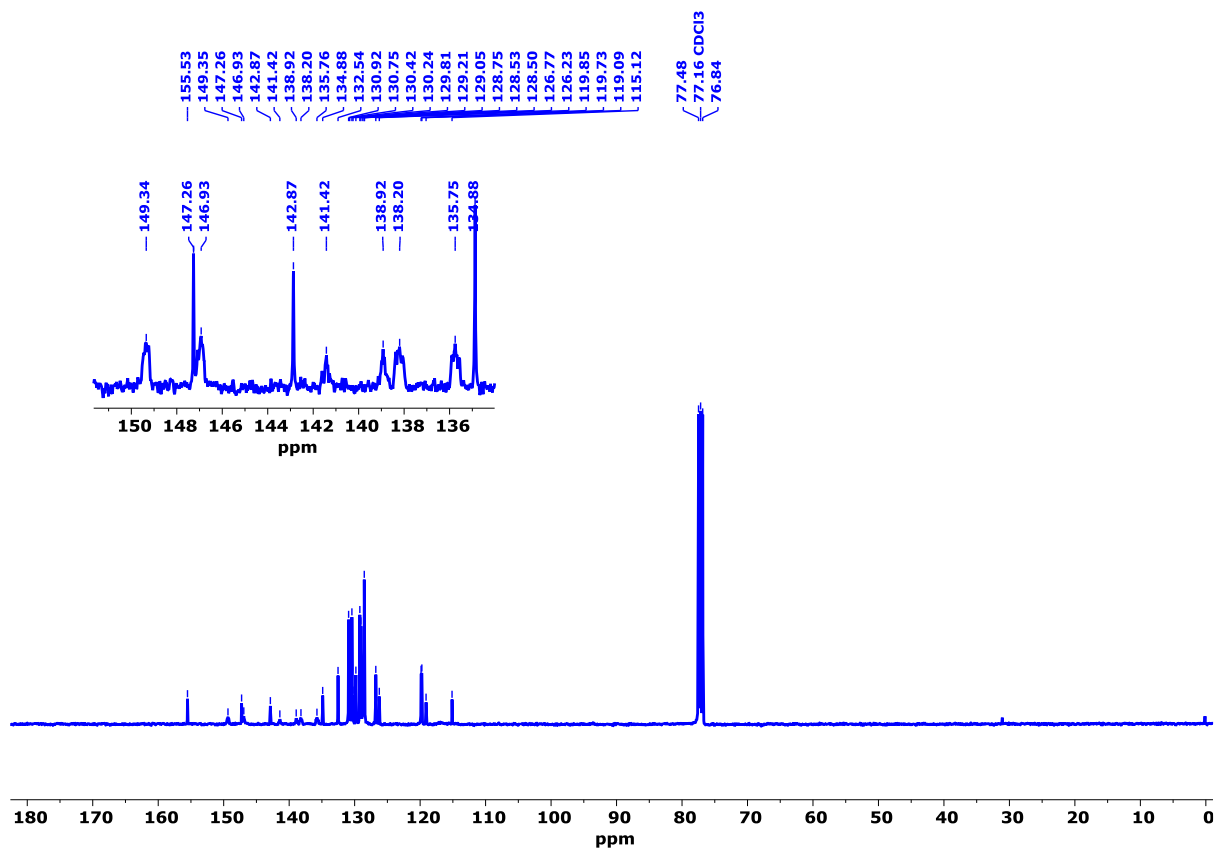

Figure S66: <sup>13</sup>C-NMR (101 MHz) spectrum of compound 4 in CDCl<sub>3</sub>

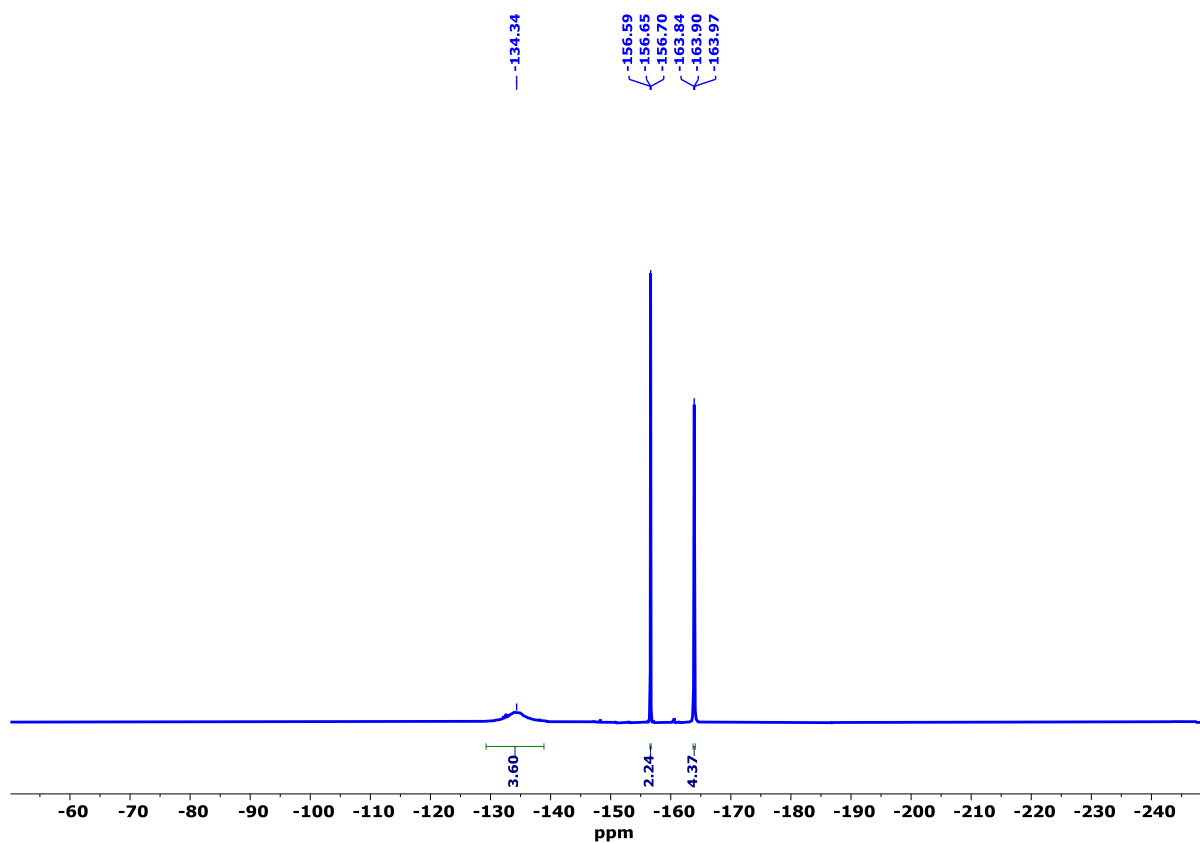

**Figure S67:**  $^{19}\text{F}$ -NMR (376 MHz) spectrum of compound 4 in  $\text{CDCl}_3$

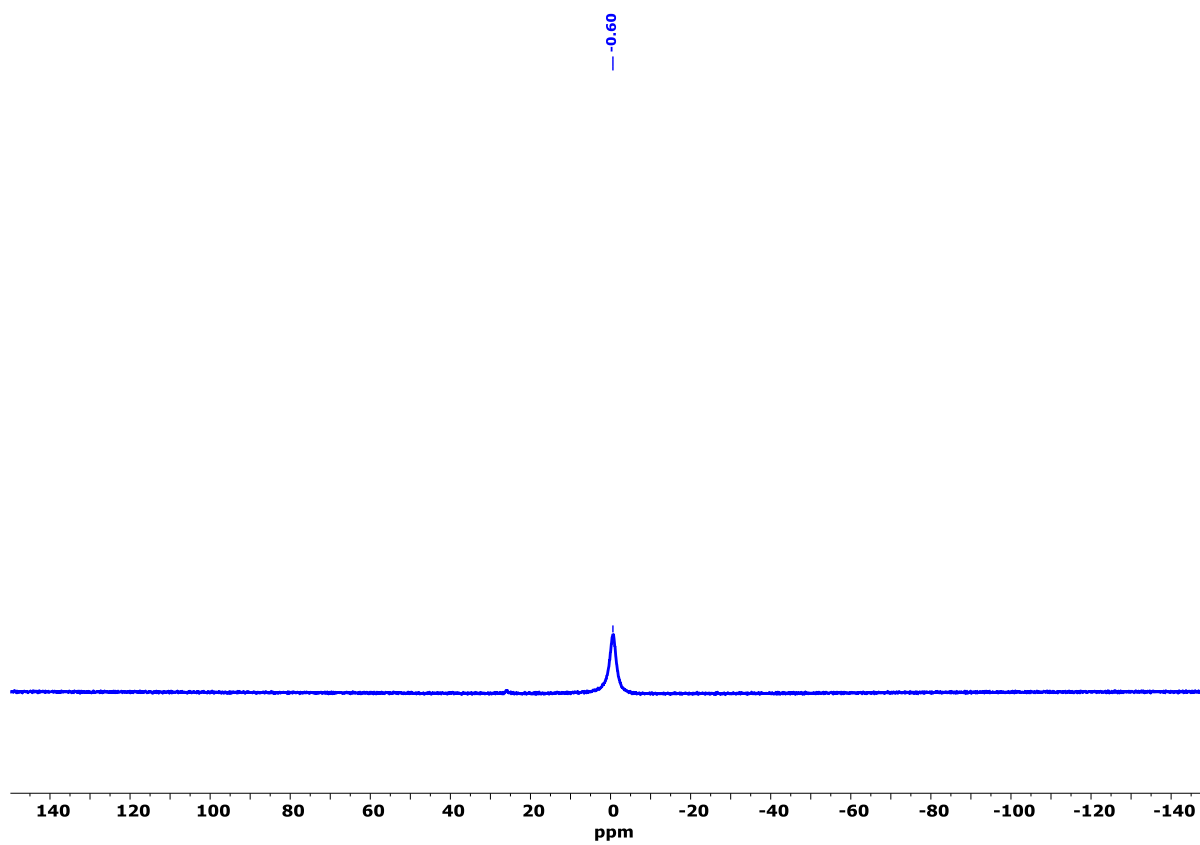

**Figure S68:**  $^{11}\text{B}$ -NMR (128 MHz) spectrum of compound 4 in  $\text{CDCl}_3$



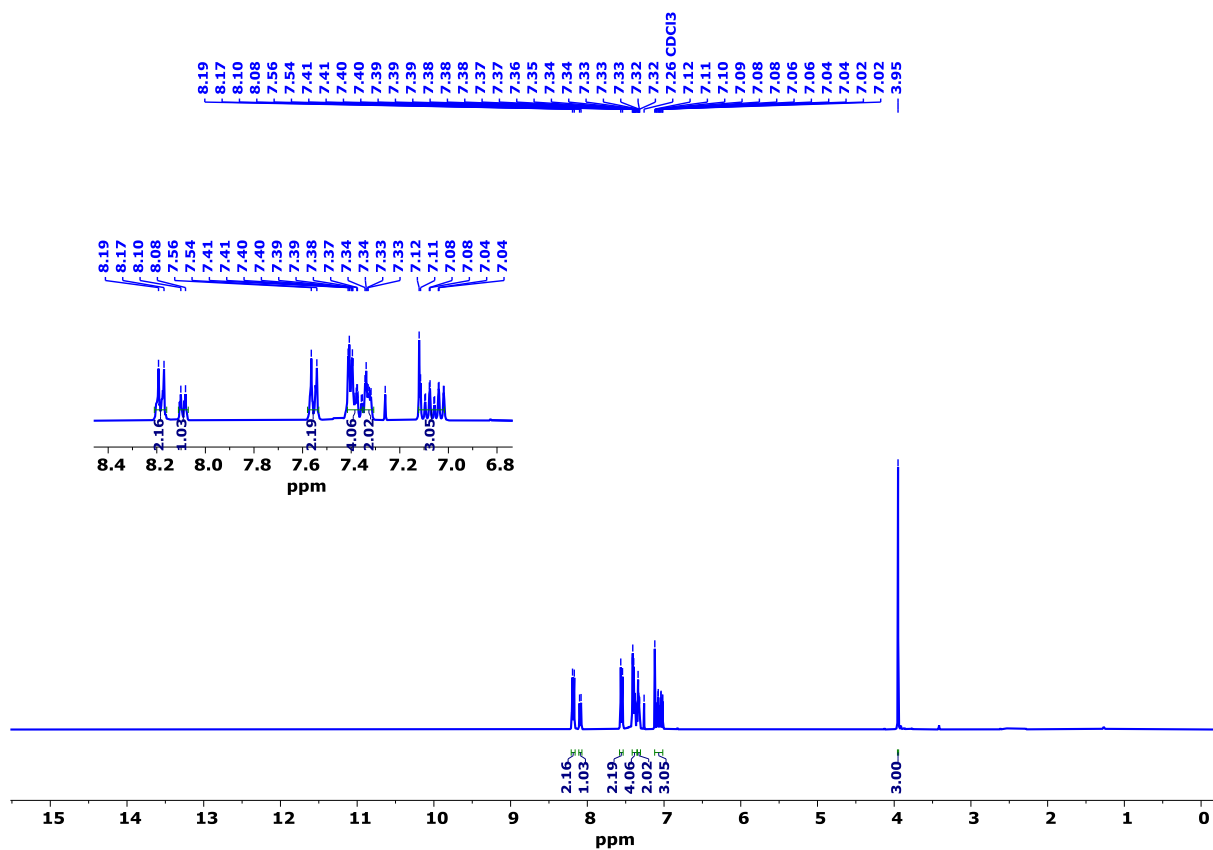

Figure S69: <sup>1</sup>H-NMR (400 MHz) spectrum of compound 5f in CDCl<sub>3</sub>

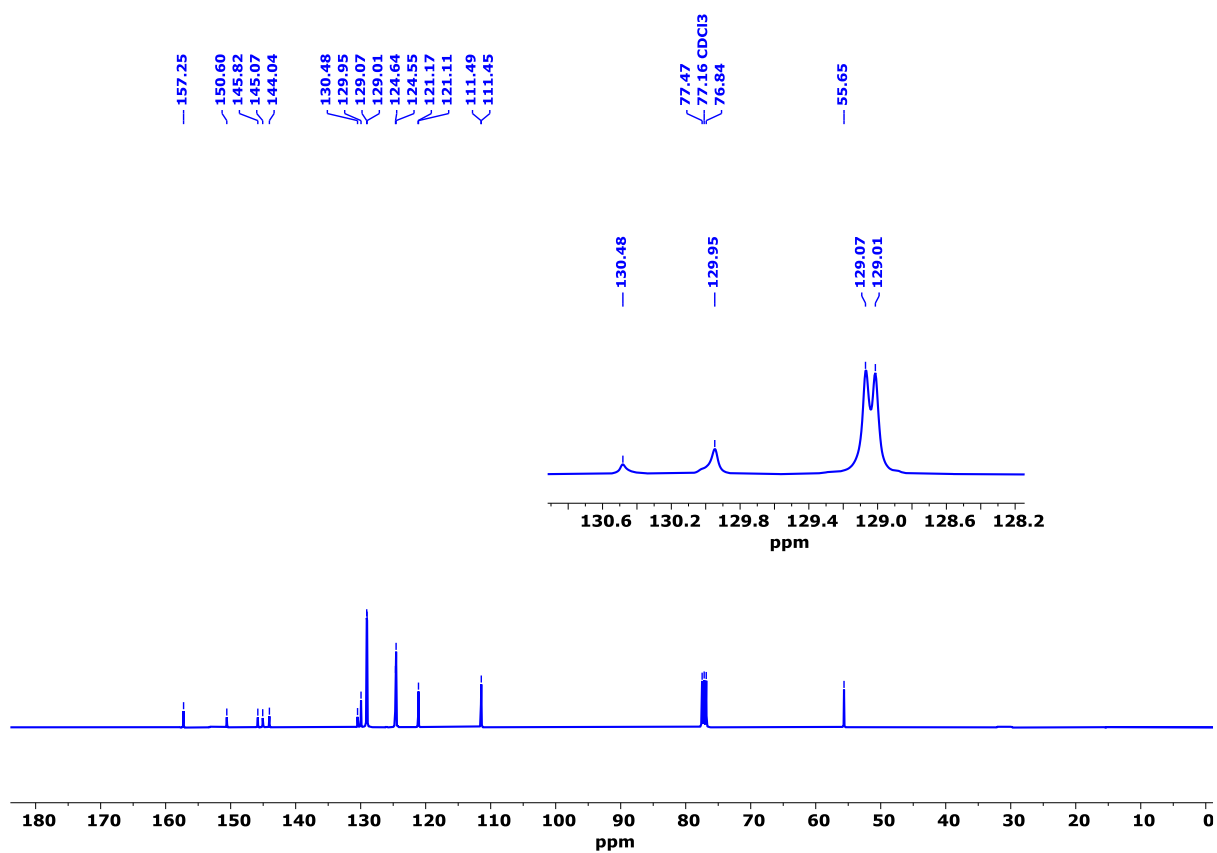

Figure S70: <sup>13</sup>C-NMR (101 MHz) spectrum of compound 5f in CDCl<sub>3</sub>

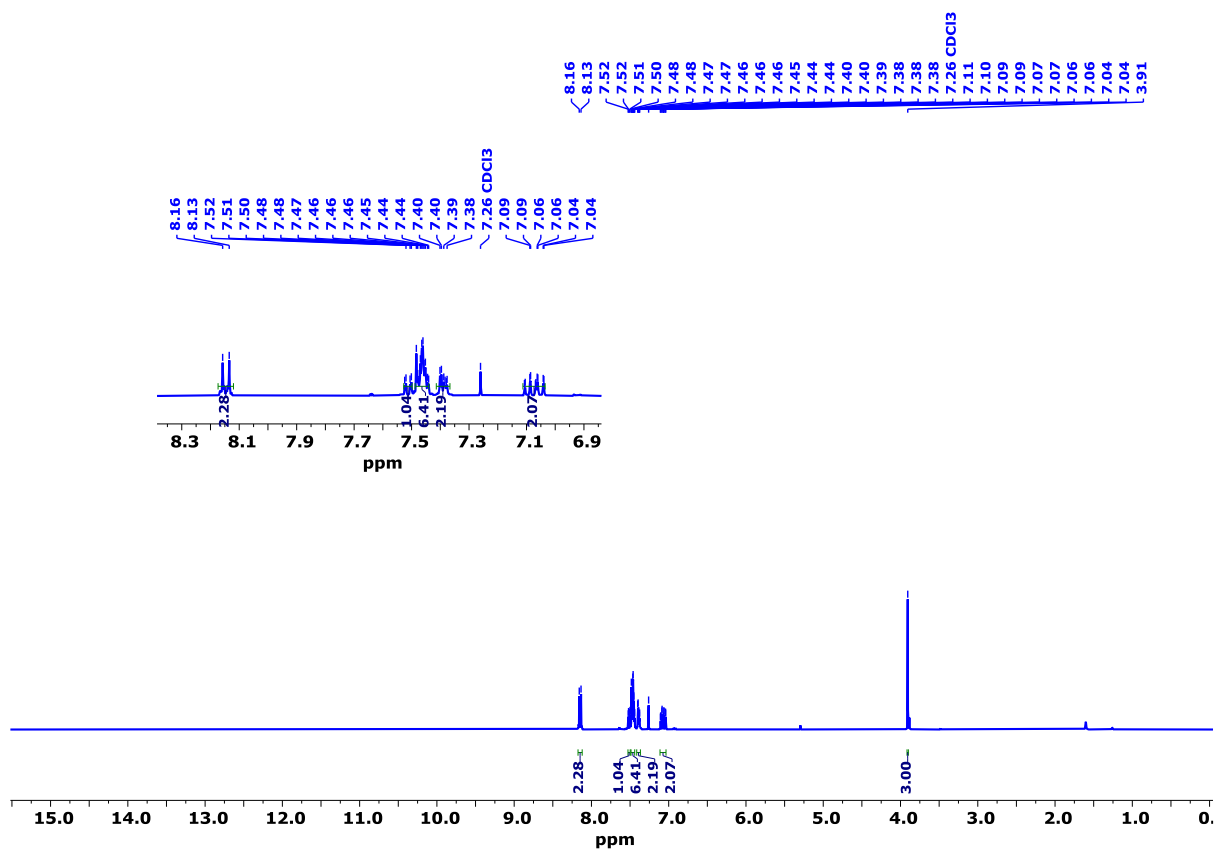

Figure S71: <sup>1</sup>H-NMR (400 MHz) spectrum of compound 5e in CDCl<sub>3</sub>

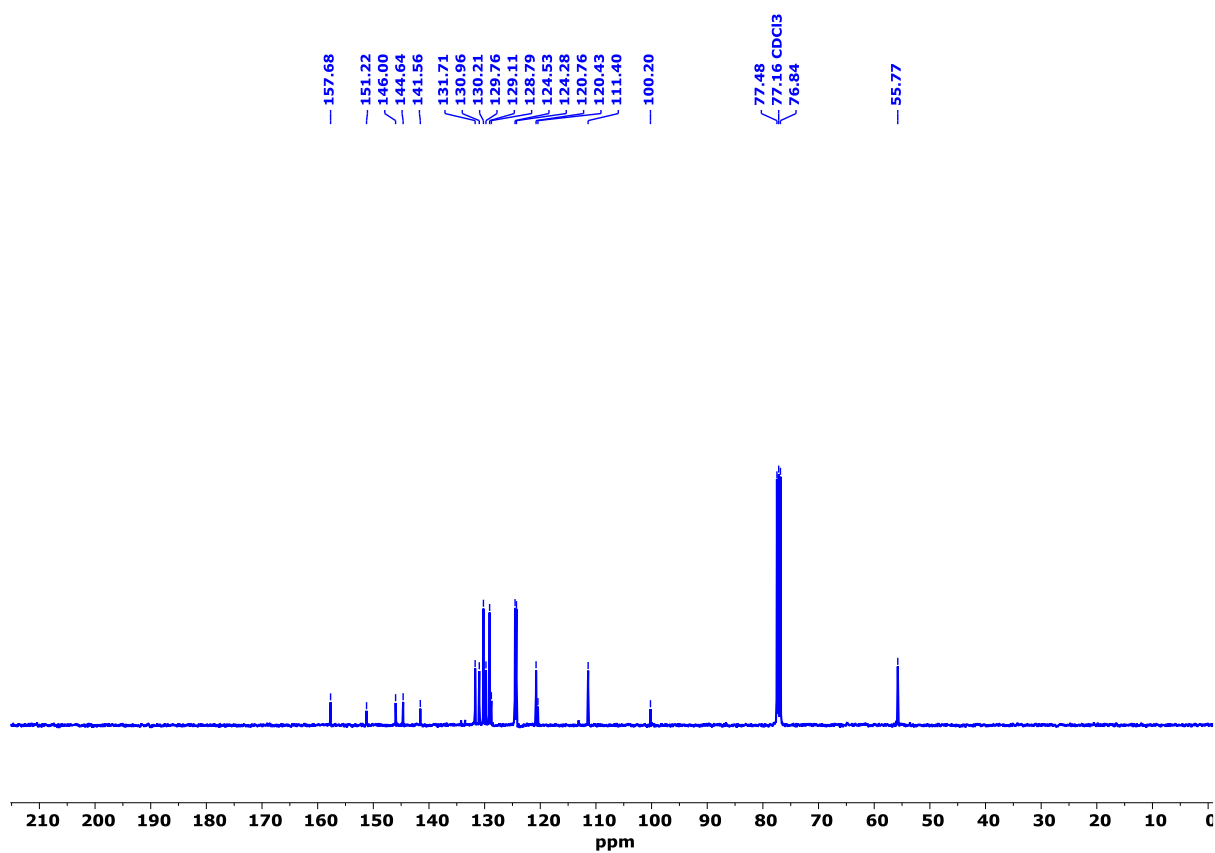

Figure S72: <sup>13</sup>C-NMR (101 MHz) spectrum of compound 5e in CDCl<sub>3</sub>

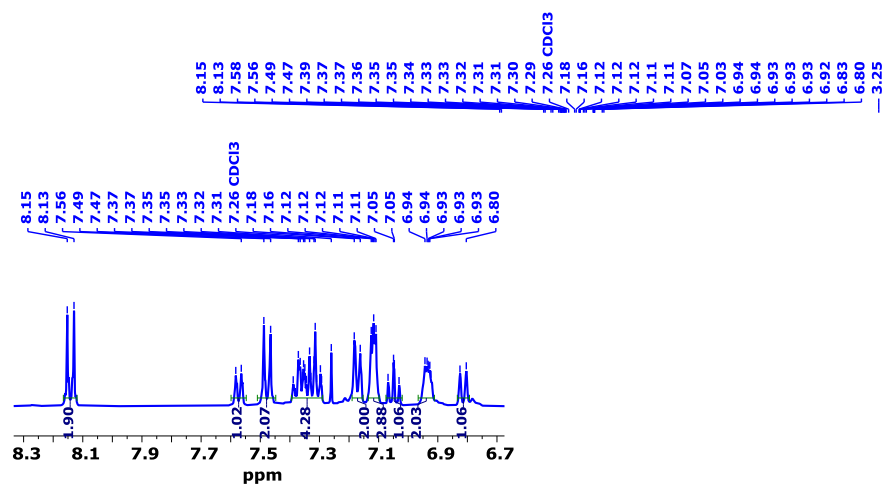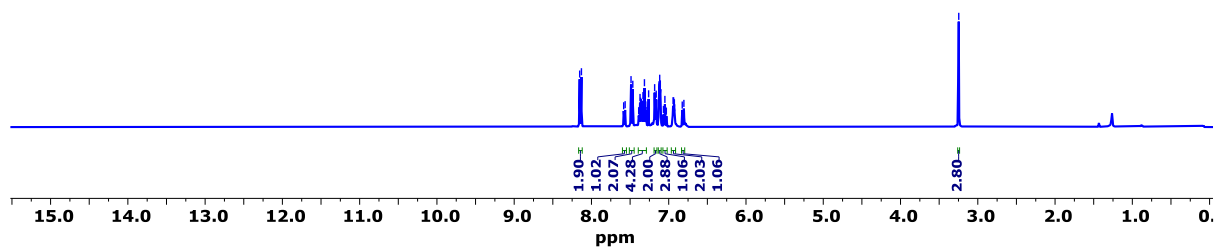

Figure S73: <sup>1</sup>H-NMR (400 MHz) spectrum of compound 5d in CDCl<sub>3</sub>

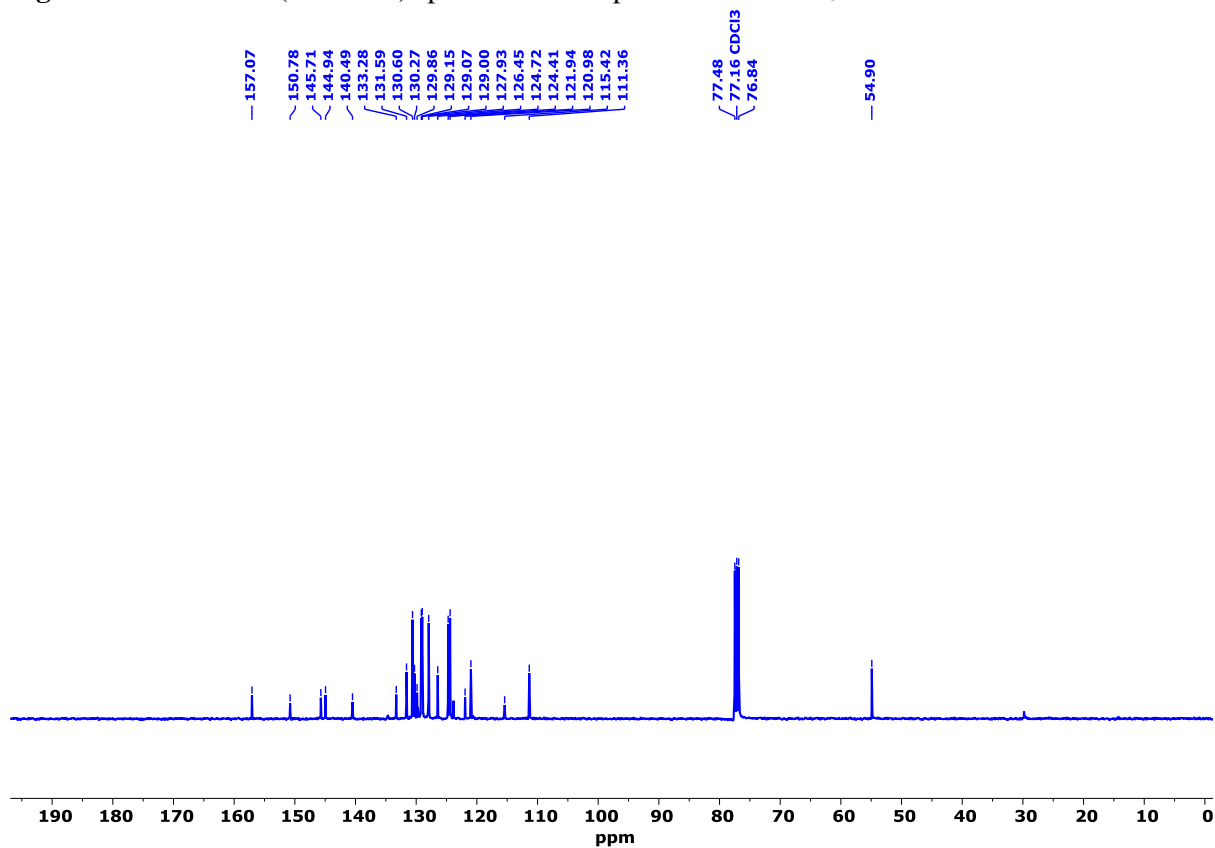

Figure S74: <sup>13</sup>C-NMR (101 MHz) spectrum of compound 5d in CDCl<sub>3</sub>

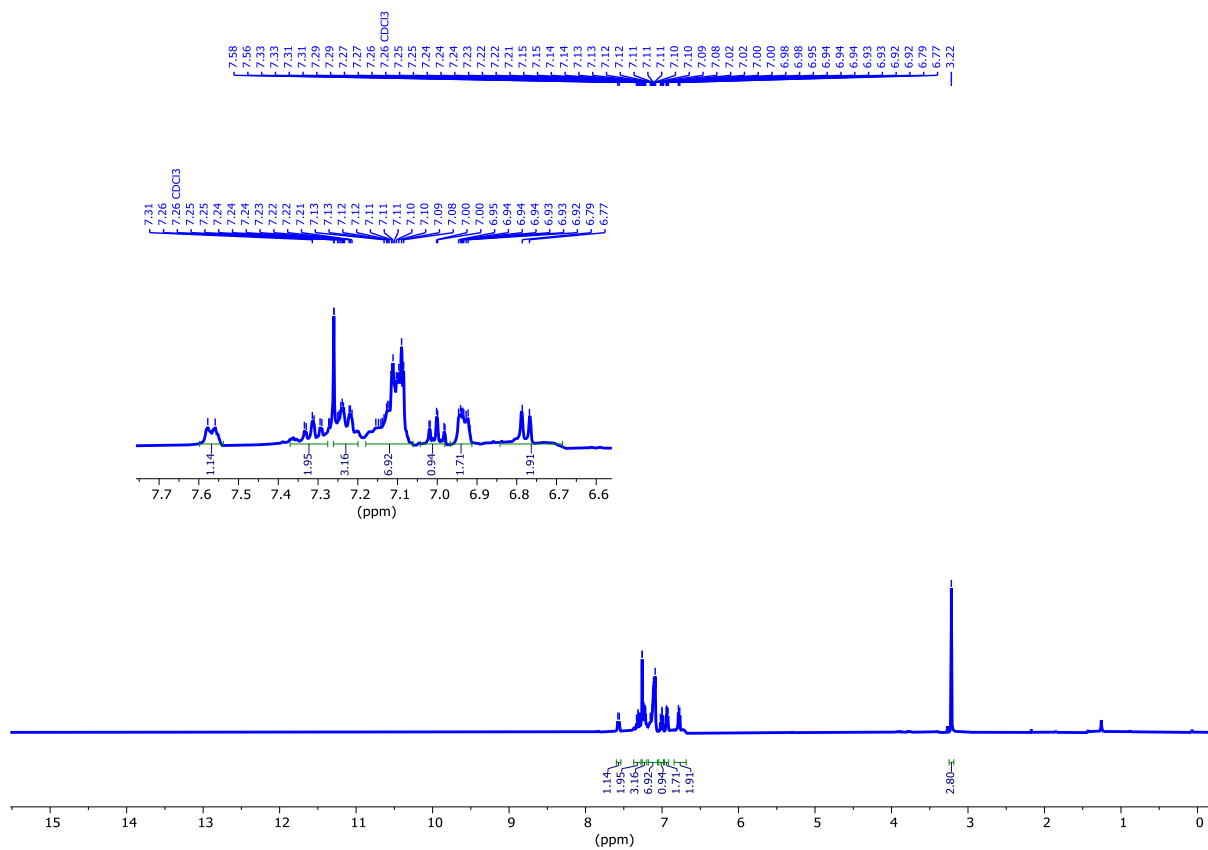

Figure S75:  $^1\text{H-NMR}$  (400 MHz) spectrum of compound 5c in  $\text{CDCl}_3$

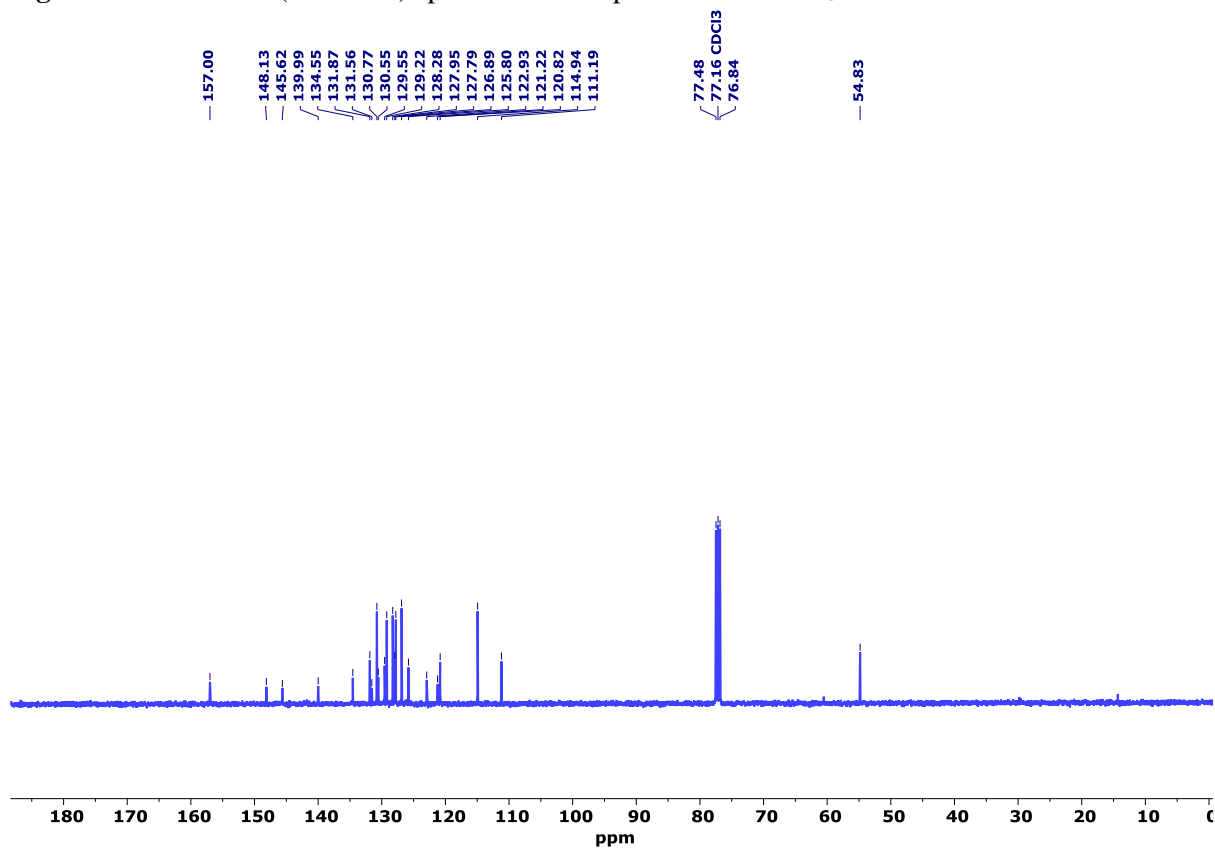

Figure S76:  $^{13}\text{C-NMR}$  (101 MHz) spectrum of compound 5c in  $\text{CDCl}_3$

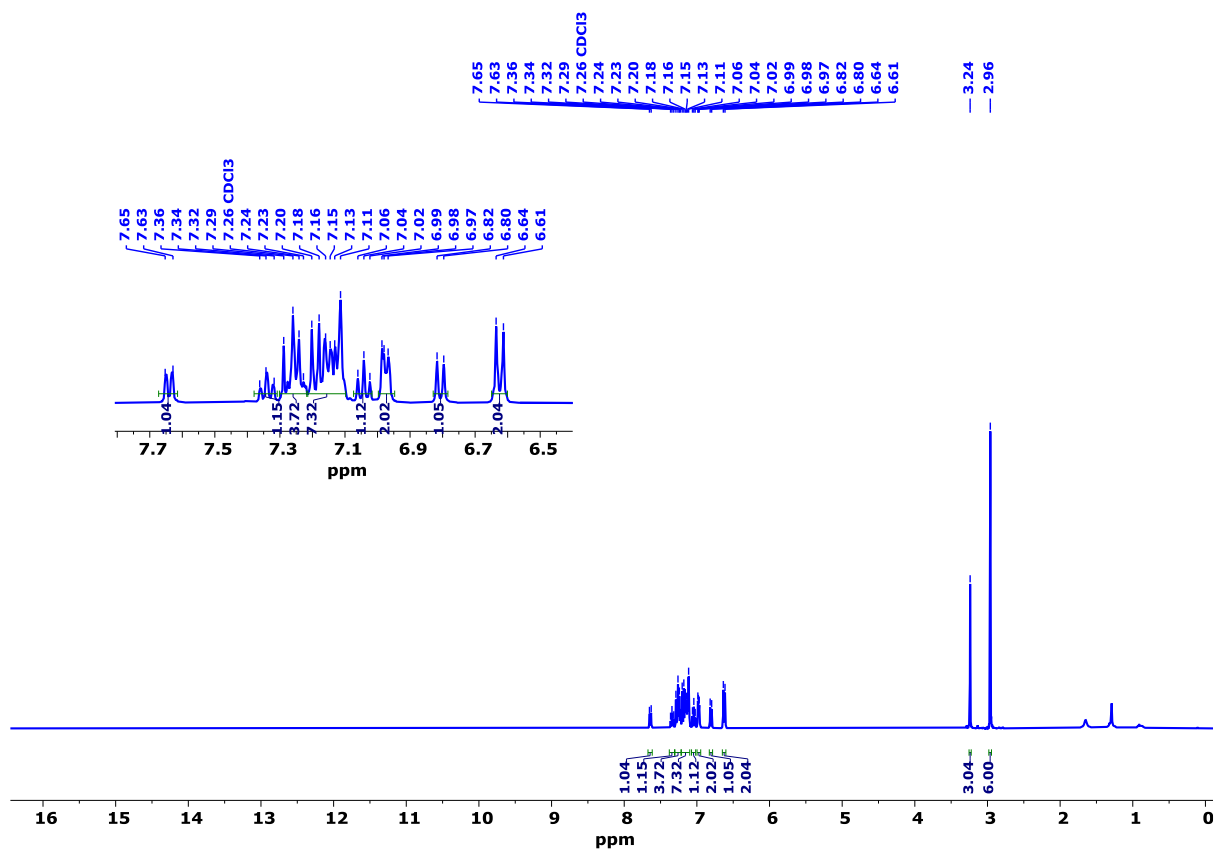

Figure S77: <sup>1</sup>H-NMR (400 MHz) spectrum of compound 5b in CDCl<sub>3</sub>

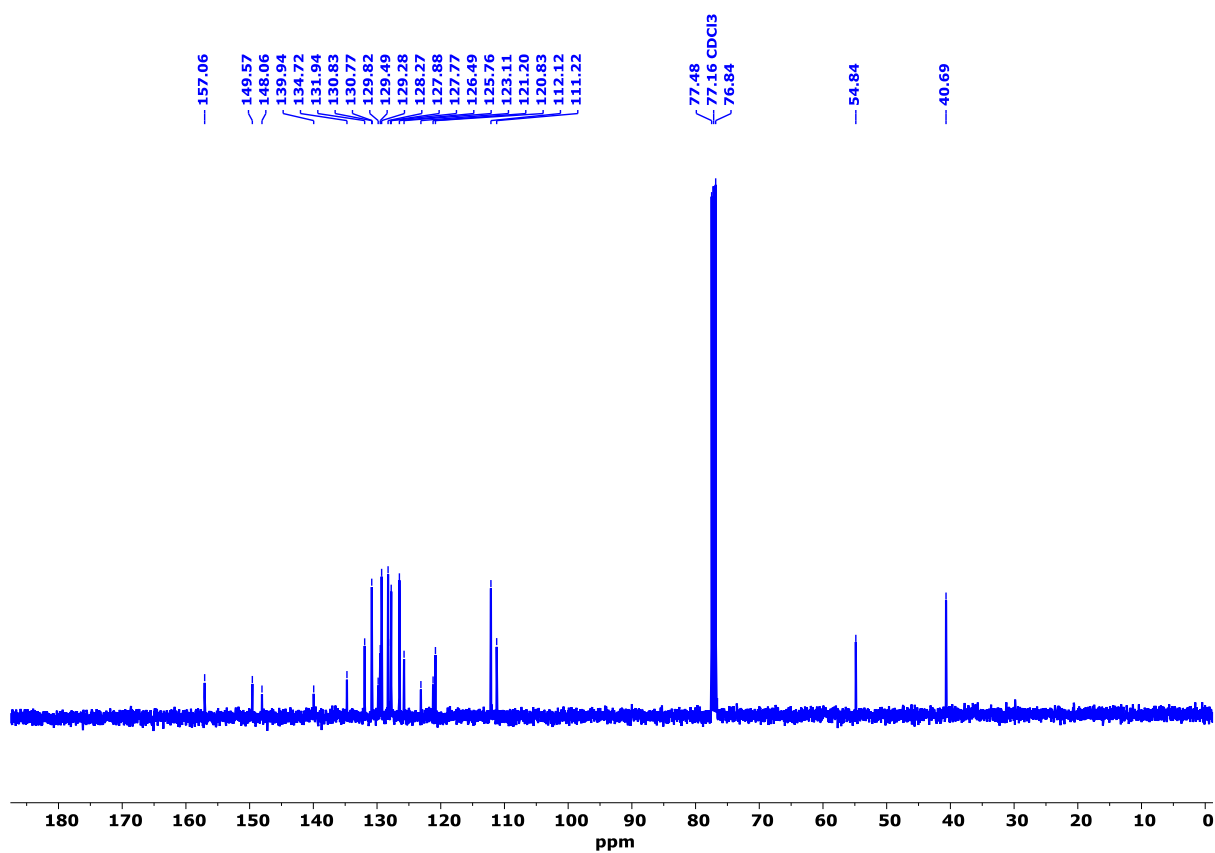

Figure S78: <sup>13</sup>C-NMR (101 MHz) spectrum of compound 5b in CDCl<sub>3</sub>

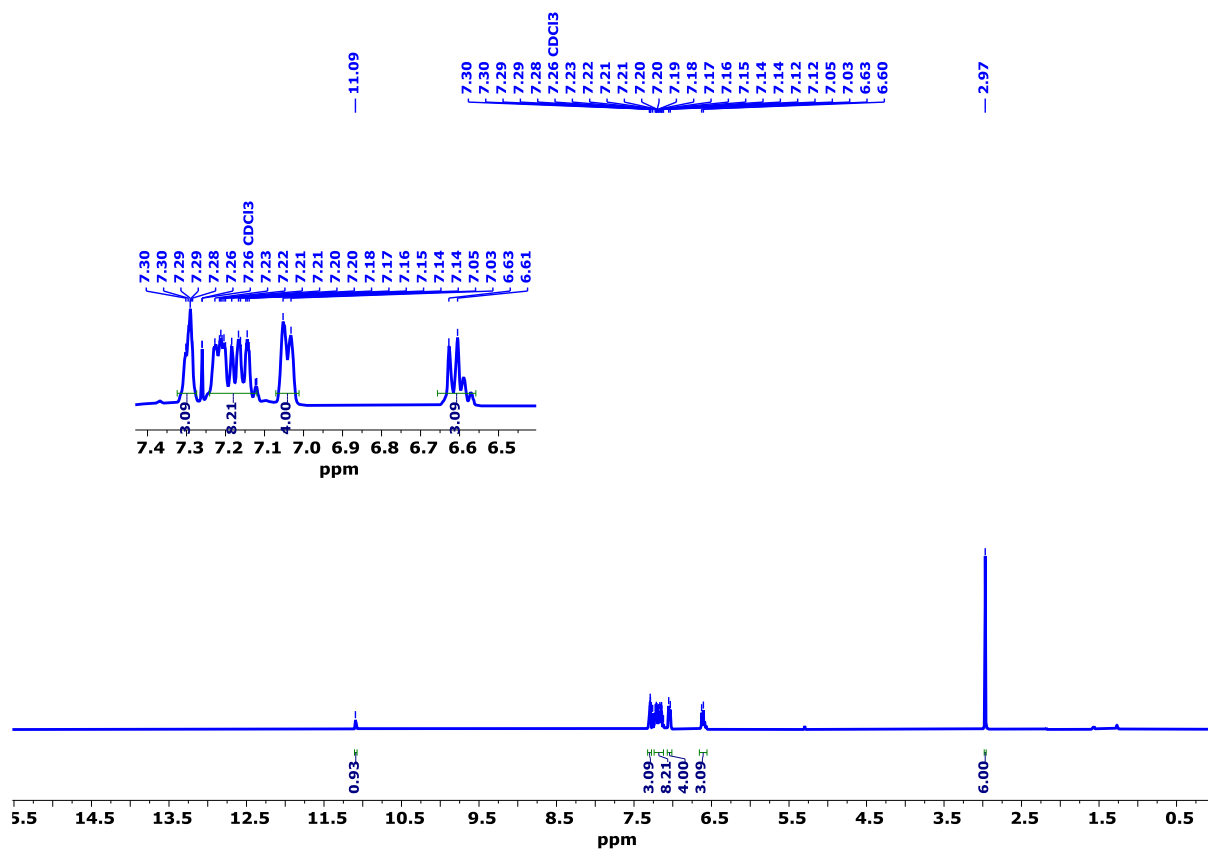

**Figure S79:**  $^1\text{H-NMR}$  (400 MHz) spectrum of compound 5a in  $\text{CDCl}_3$

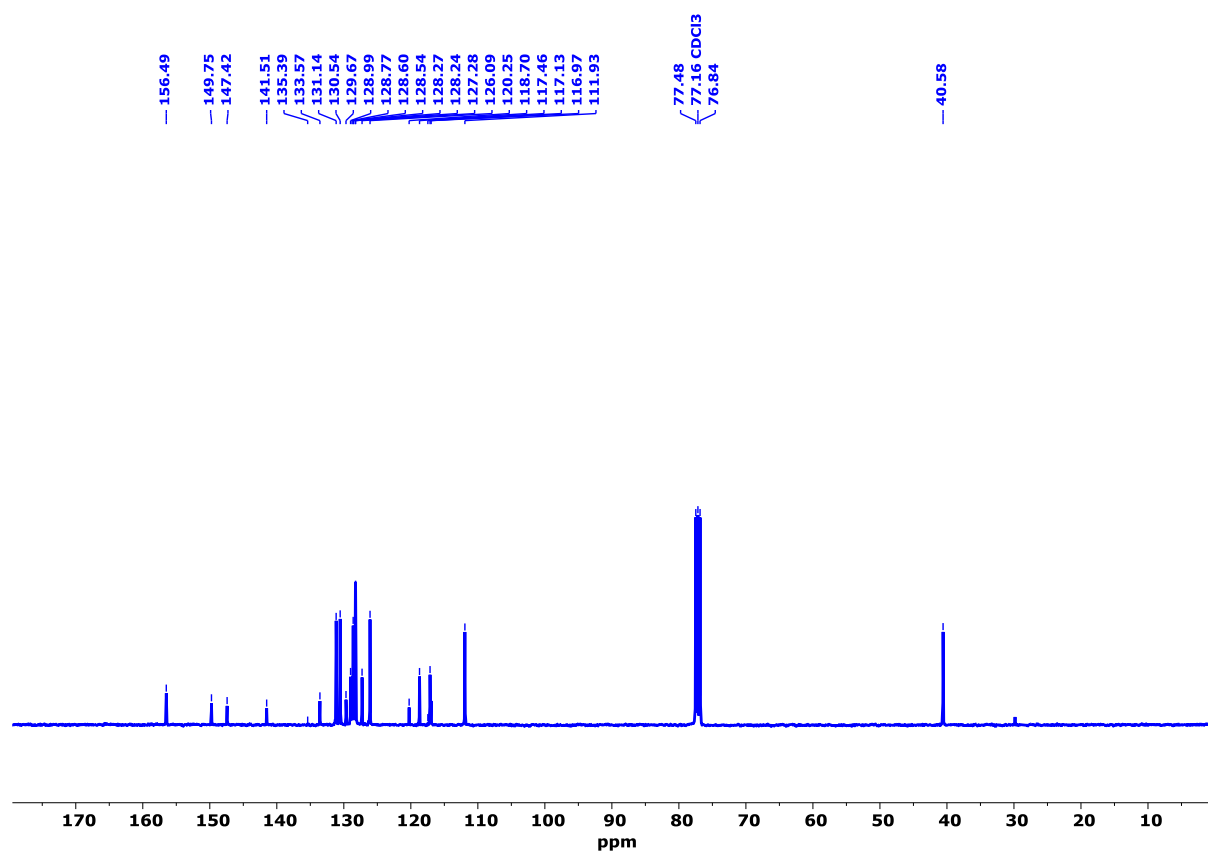

**Figure S80:**  $^{13}\text{C-NMR}$  (101 MHz) spectrum of compound 5a in  $\text{CDCl}_3$

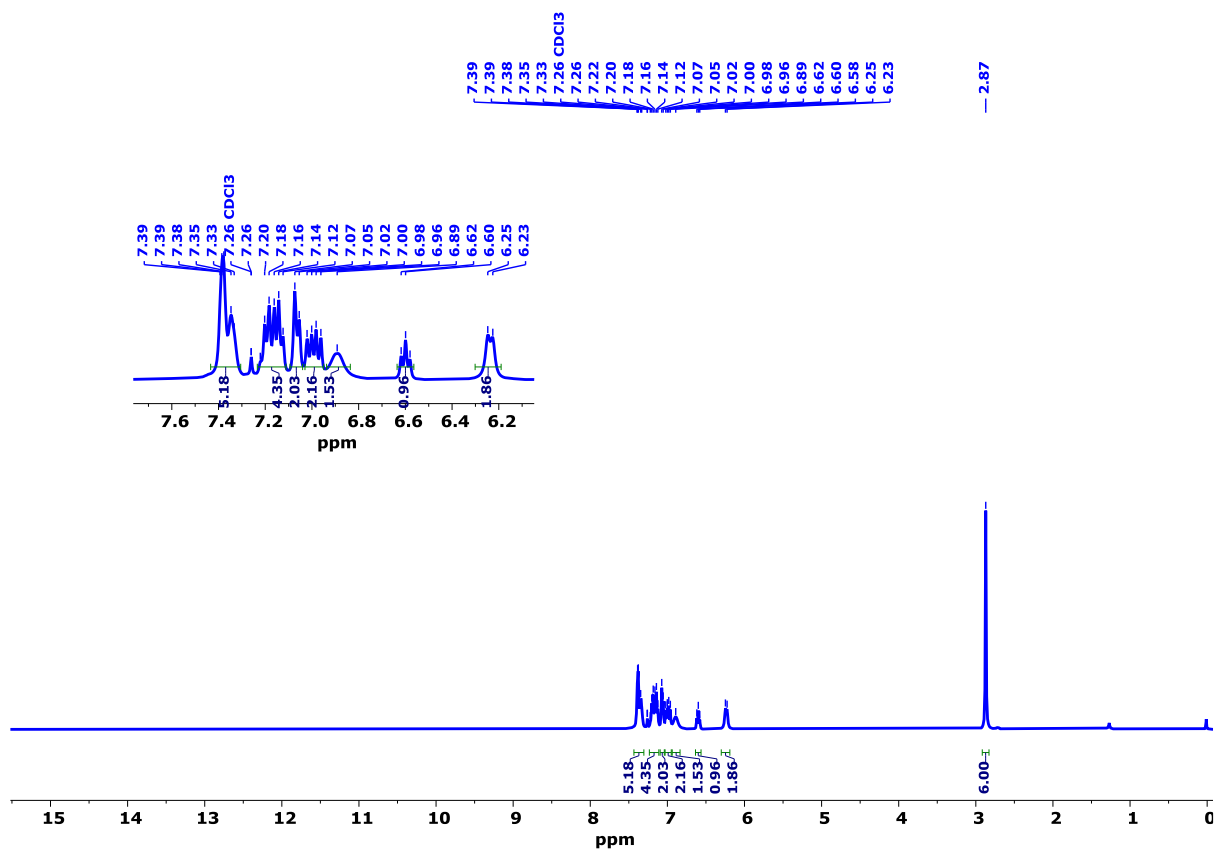

**Figure S81:**  $^1\text{H-NMR}$  (400 MHz) spectrum of compound 5 in  $\text{CDCl}_3$

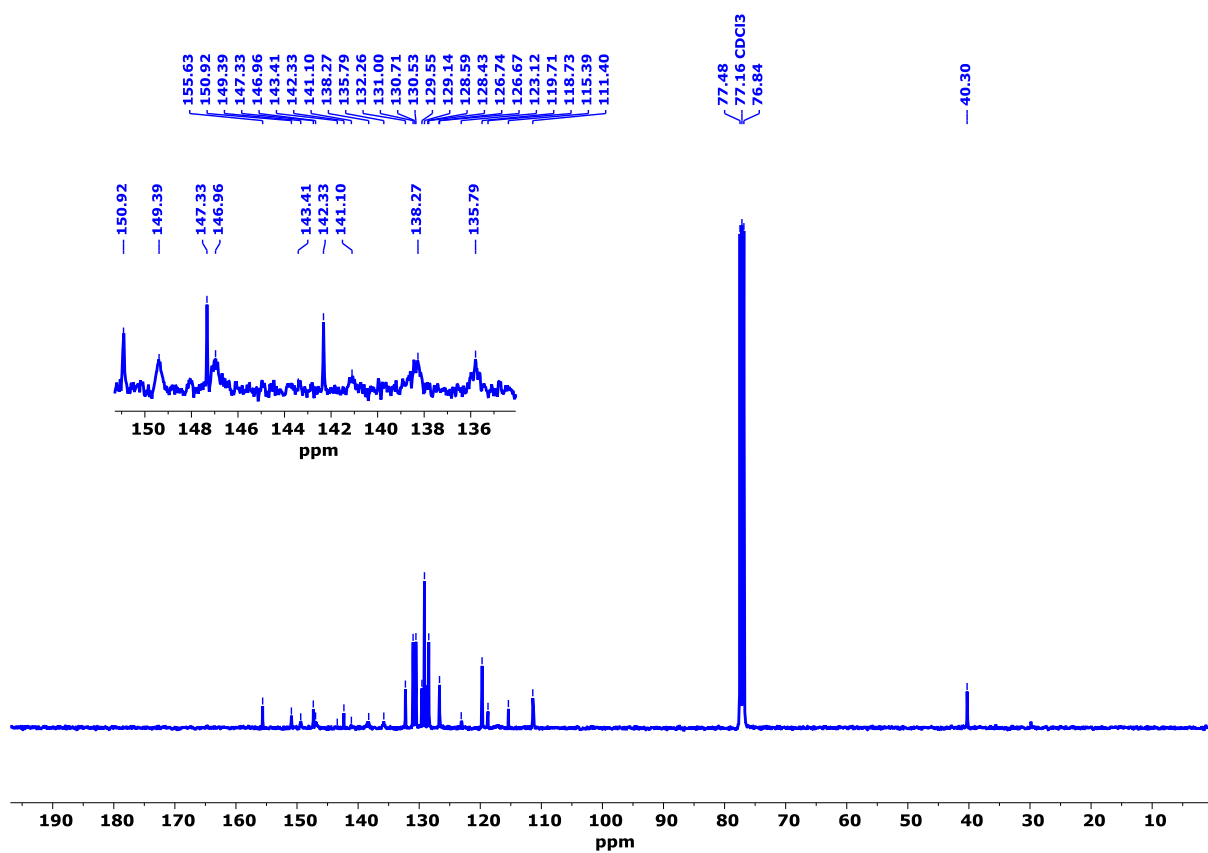

**Figure S82:**  $^{13}\text{C-NMR}$  (101 MHz) spectrum of compound 5 in  $\text{CDCl}_3$

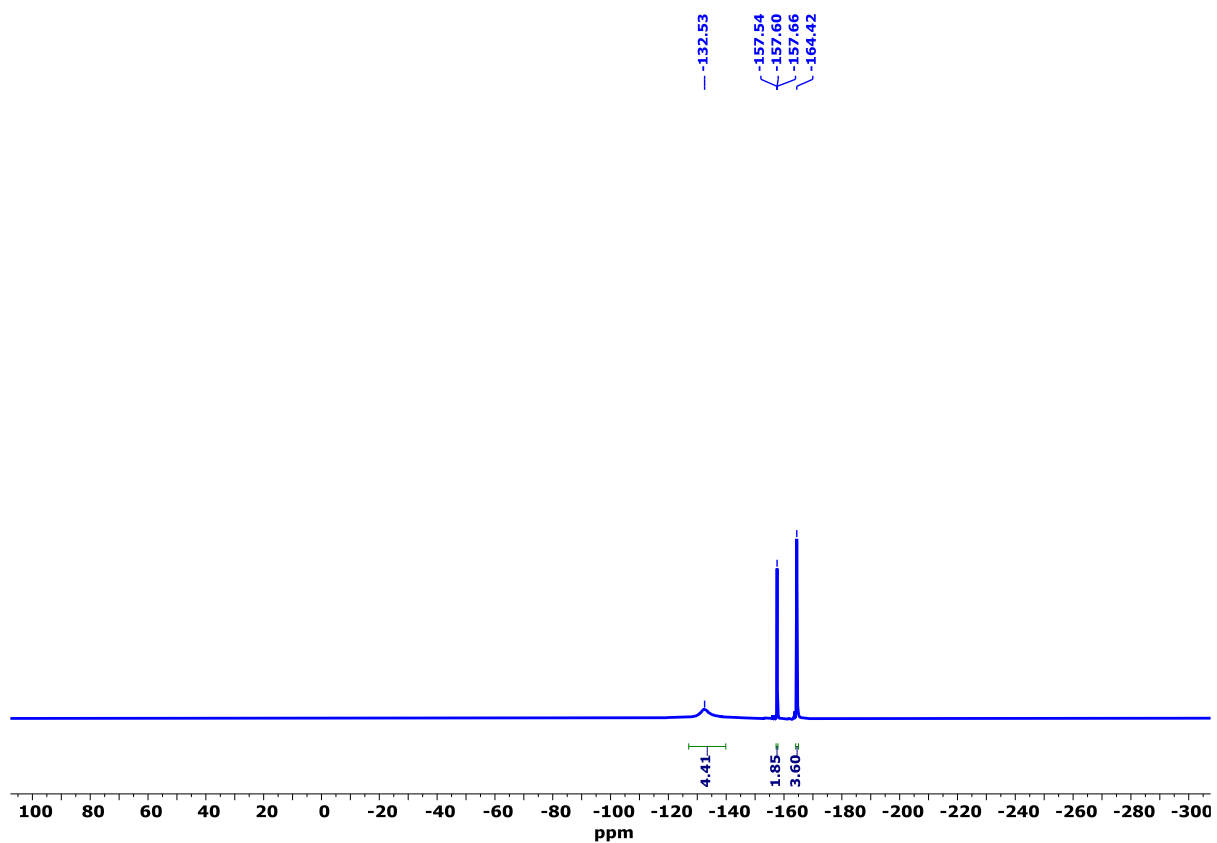

**Figure S83:**  $^{19}\text{F}$ -NMR (376 MHz) spectrum of compound 5 in  $\text{CDCl}_3$

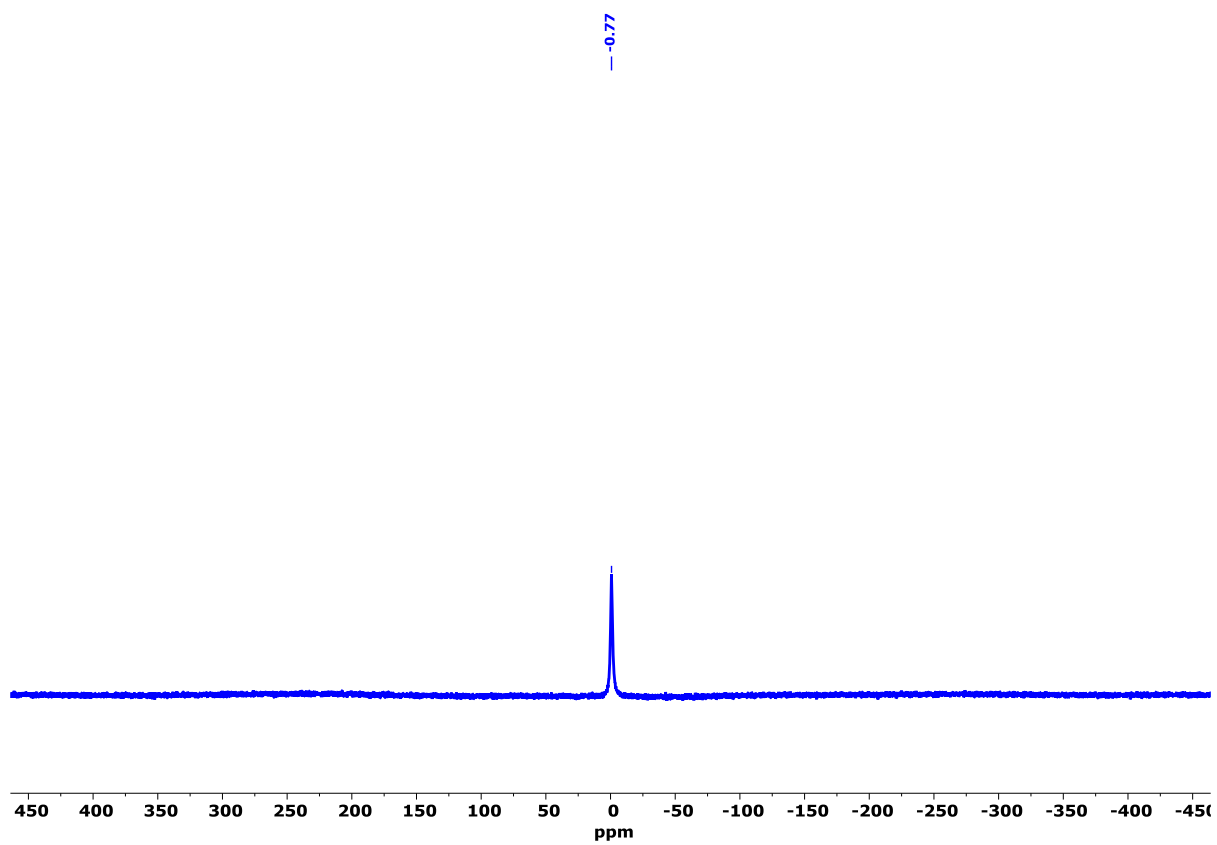

**Figure S84:**  $^{11}\text{B}$ -NMR (128 MHz) spectrum of compound 5 in  $\text{CDCl}_3$



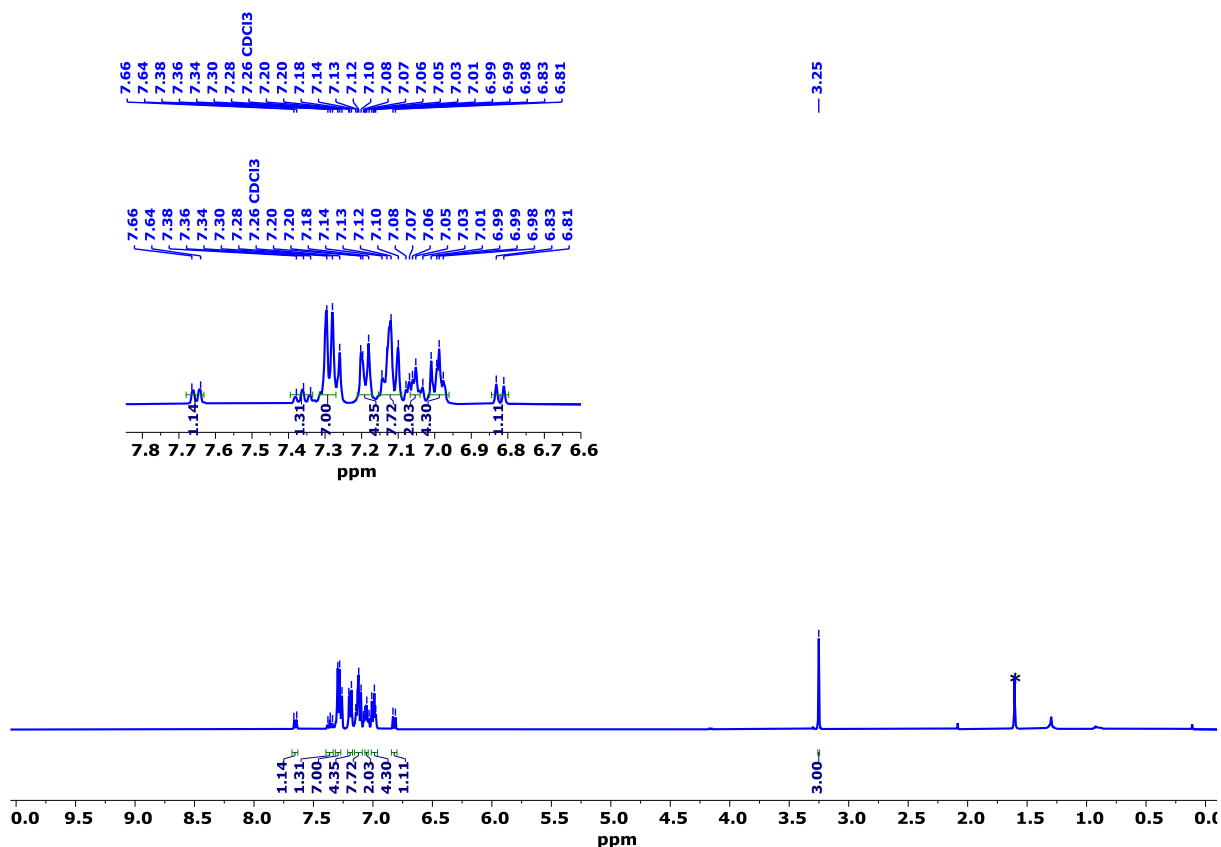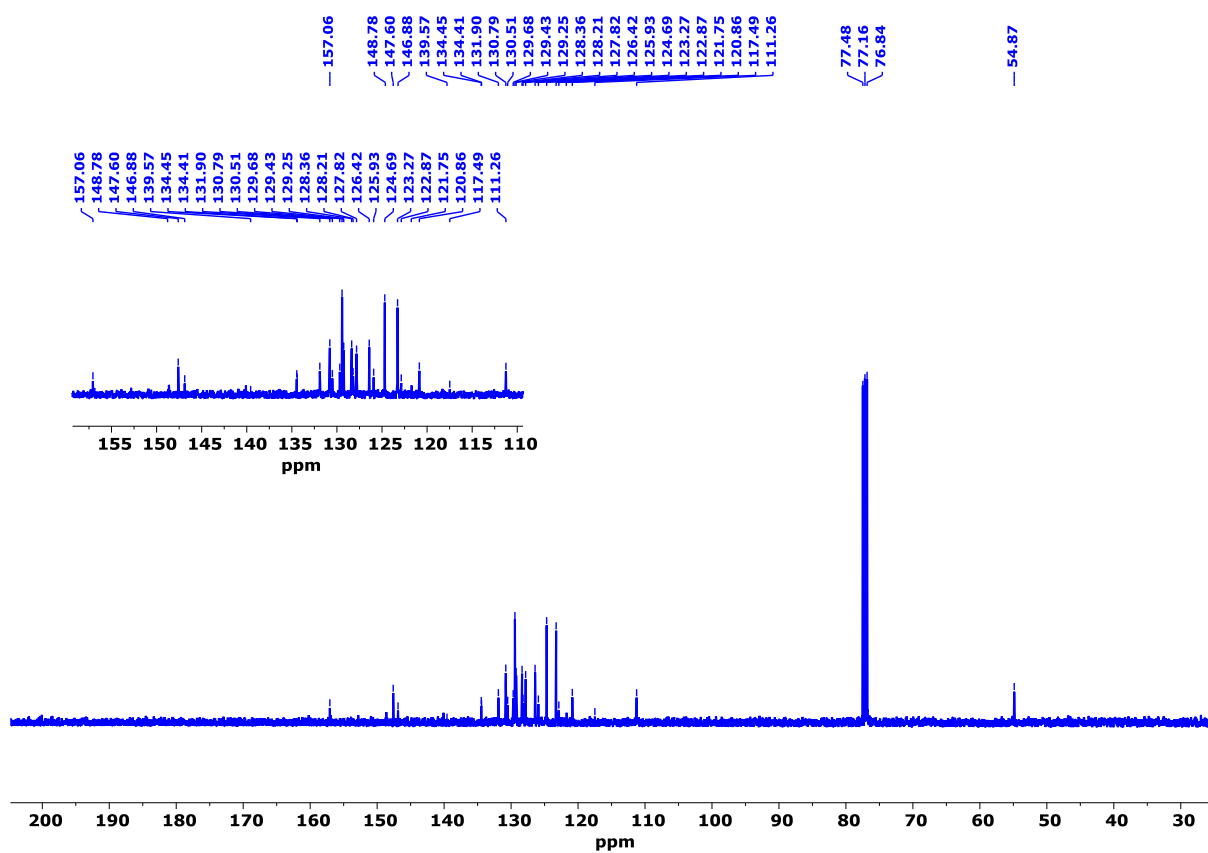

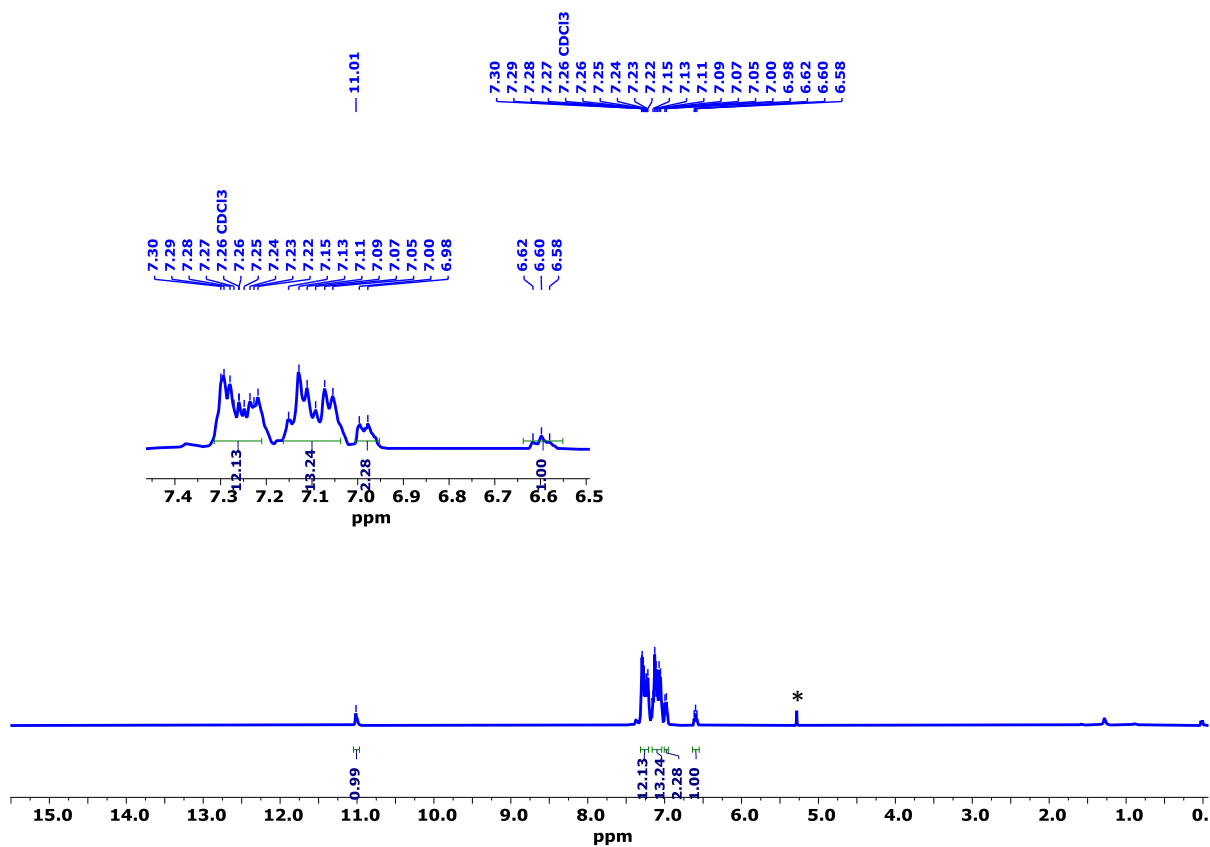

Figure S87:  $^1\text{H-NMR}$  (400 MHz) spectrum of compound 6a in  $\text{CDCl}_3$  (\* $\text{CH}_2\text{Cl}_2$  peak)

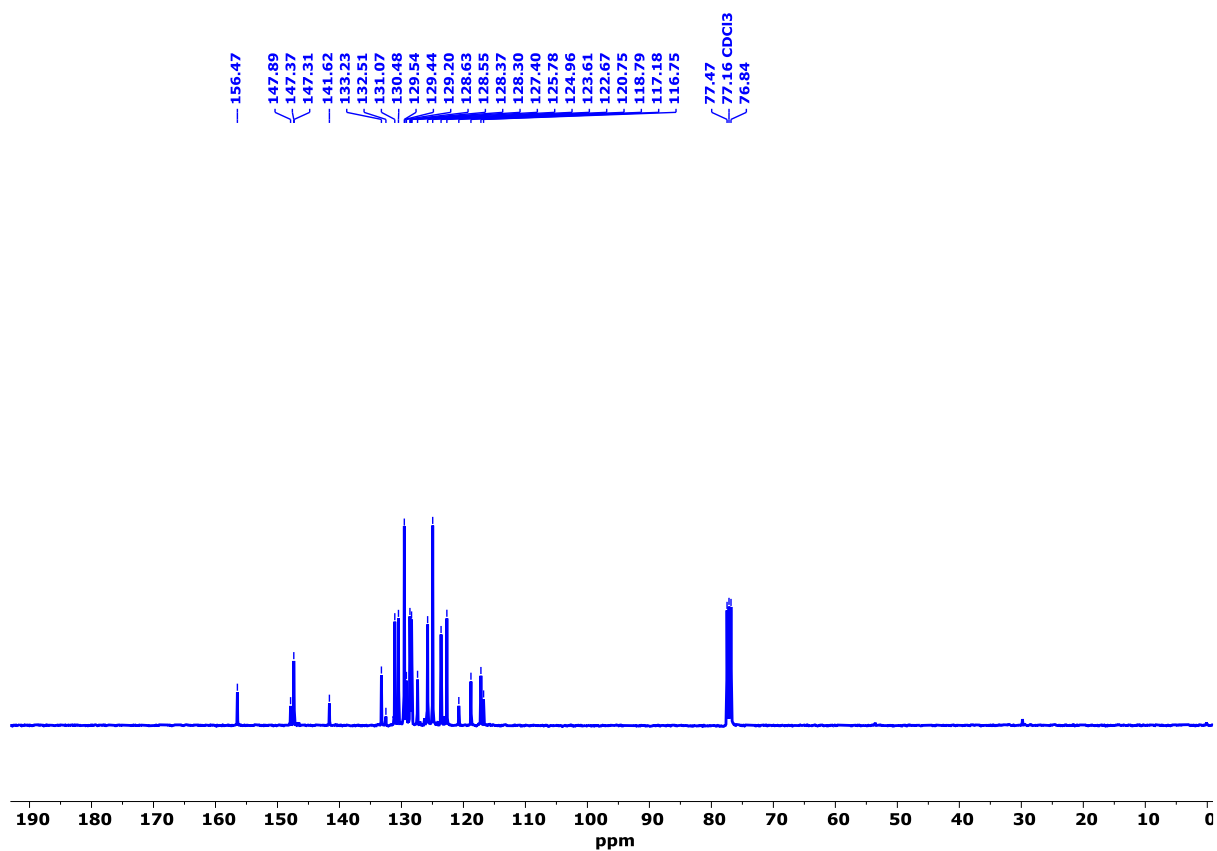

Figure S88:  $^{13}\text{C-NMR}$  (101 MHz) spectrum of compound 6a in  $\text{CDCl}_3$

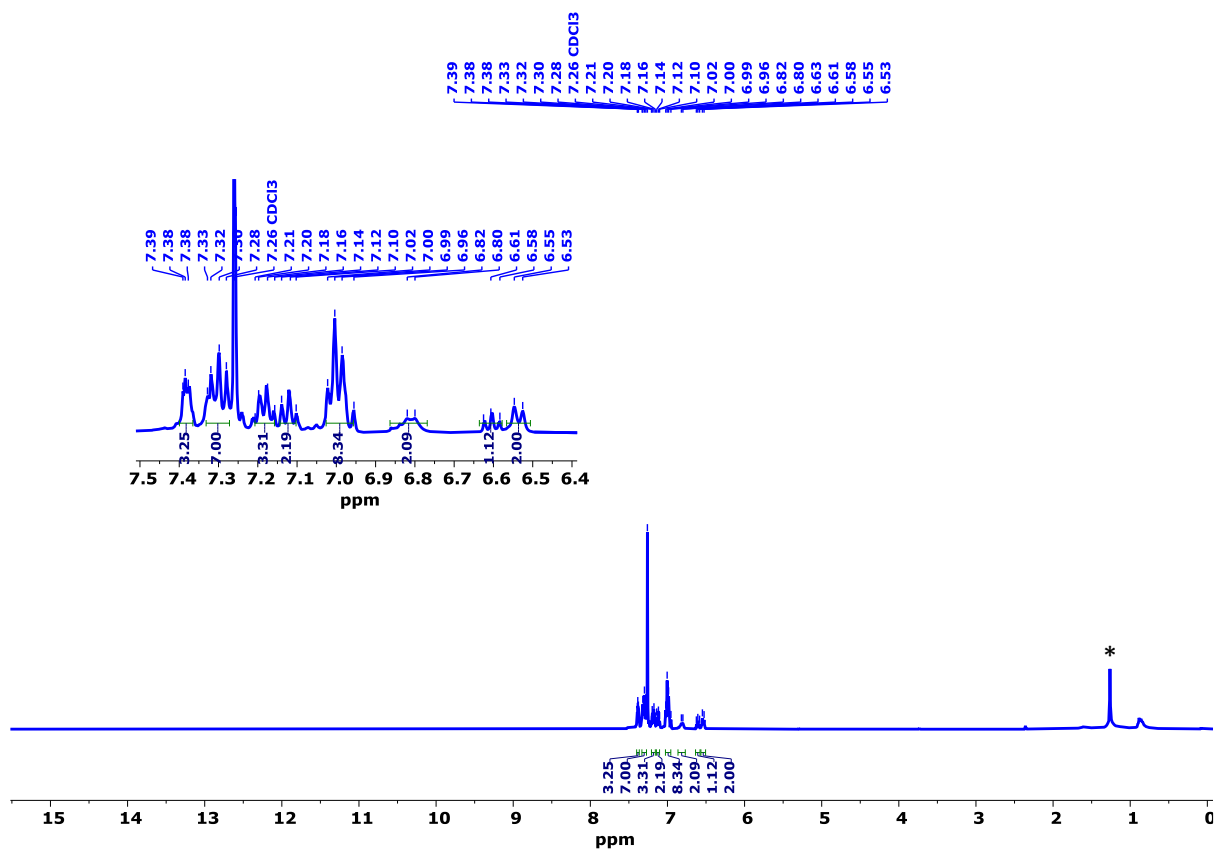

Figure S89:  $^1\text{H-NMR}$  (400 MHz) spectrum of compound 6 in  $\text{CDCl}_3$  (\*grease peak)

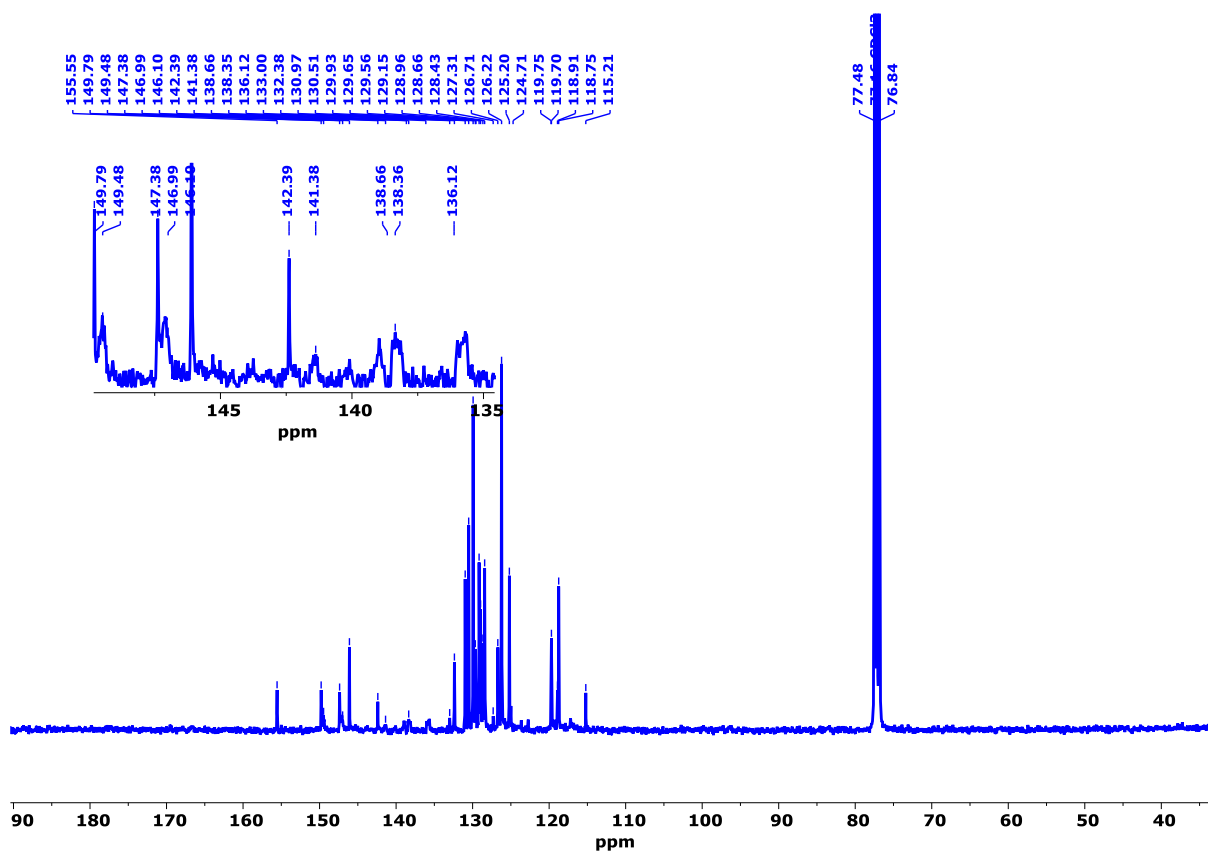

Figure S90:  $^{13}\text{C-NMR}$  (101 MHz) spectrum of compound 6 in  $\text{CDCl}_3$

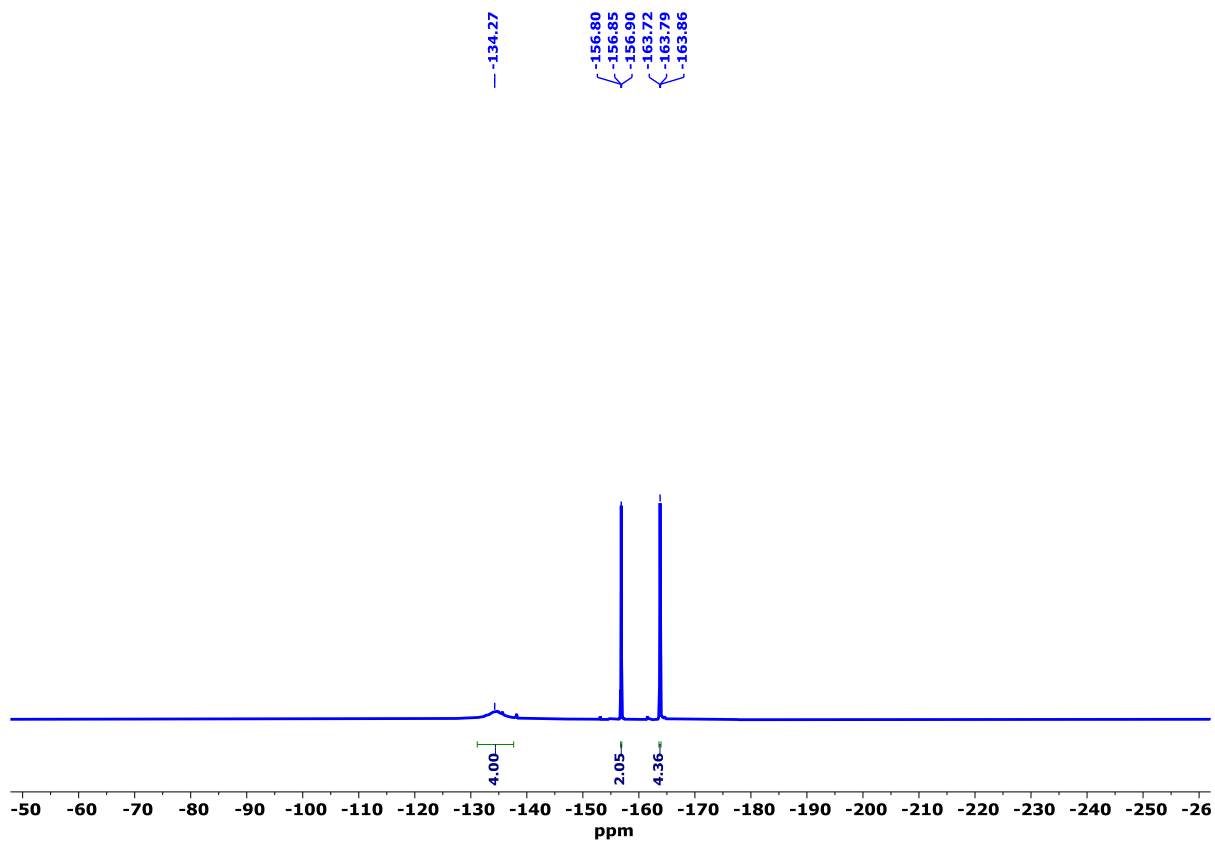

**Figure S91:**  $^{19}\text{F}$ -NMR (376 MHz) spectrum of compound 6 in  $\text{CDCl}_3$

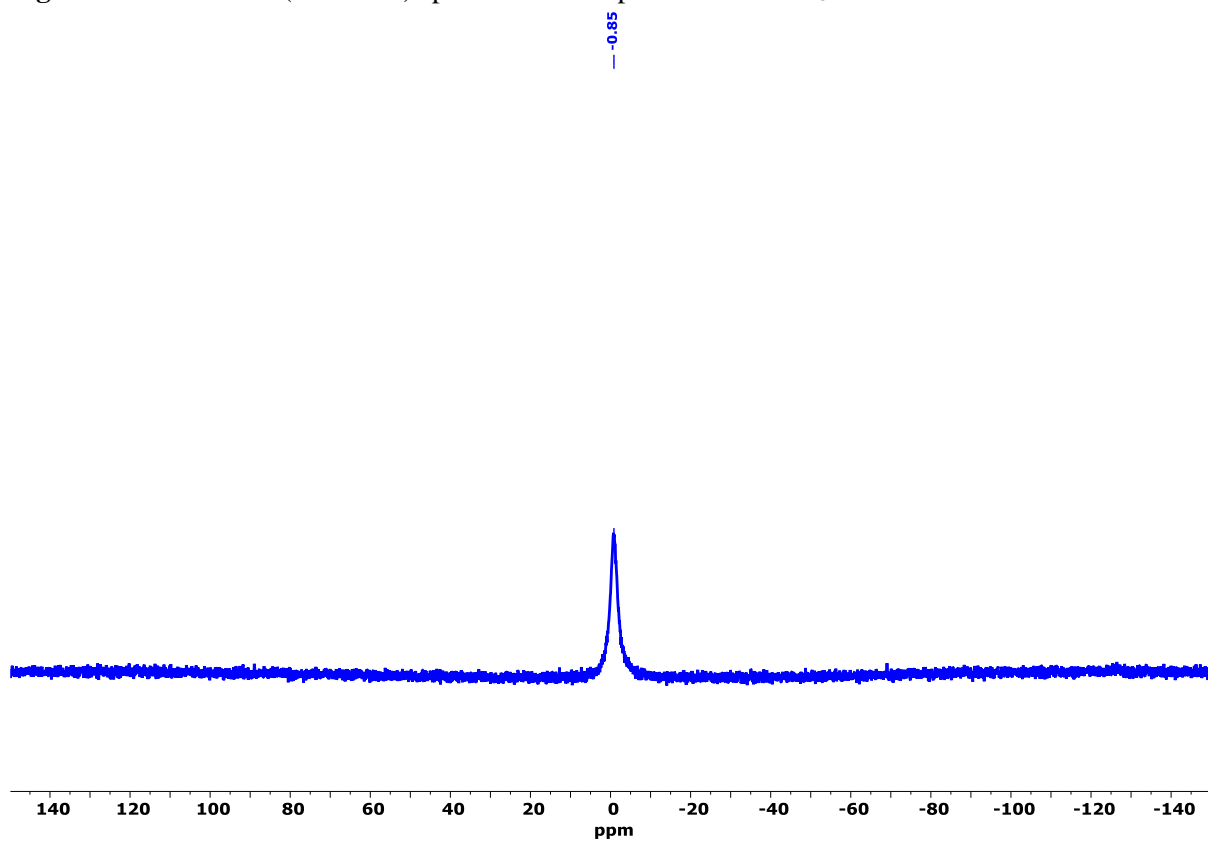

**Figure S92:**  $^{11}\text{B}$ -NMR (128 MHz) spectrum of compound 6 in  $\text{CDCl}_3$

DFT calculations were performed with the Gaussian 16 program.<sup>2</sup> The structures were optimized using 6-31G(d,p) (B3LYP) as the basis set. Frequency calculations confirmed the optimized structures to be local minimum structures. Excitation data were determined using TD-DFT (B3LYP/631g(d,p)) calculations.

**Table S6.** Calculated electronic transitions for compound **1-6**

| Compound                       | Transition                     | MO contributions           | Energy gap<br>eV (nm) | Oscillator<br>strength/f |
|--------------------------------|--------------------------------|----------------------------|-----------------------|--------------------------|
| <b>1</b>                       | S <sub>0</sub> →S <sub>1</sub> | HOMO→LUMO                  | 3.74 (331)            | 0.1292                   |
|                                | S <sub>0</sub> →S <sub>2</sub> | HOMO-1→LUMO                | 4.07 (304)            | 0.0019                   |
|                                | S <sub>0</sub> →S <sub>3</sub> | HOMO-3→LUMO<br>HOMO-2→LUMO | 4.15 (298)            | 0.0280                   |
| <b>2</b>                       | S <sub>0</sub> →S <sub>1</sub> | HOMO→LUMO                  | 3.29 (375)            | 0.2707                   |
|                                | S <sub>0</sub> →S <sub>2</sub> | HOMO-1→LUMO                | 3.98 (311)            | 0.0008                   |
|                                |                                | HOMO→LUMO+1                |                       |                          |
|                                |                                | HOMO→LUMO+2                |                       |                          |
| S <sub>0</sub> →S <sub>3</sub> | HOMO-1→LUMO<br>HOMO→LUMO+1     | 4.00 (309)                 | 0.0153                |                          |
| <b>3</b>                       | S <sub>0</sub> →S <sub>1</sub> | HOMO→LUMO                  | 3.05 (406)            | 0.3580                   |
|                                | S <sub>0</sub> →S <sub>2</sub> | HOMO-1→LUMO                | 3.82 (324)            | 0.0221                   |
|                                |                                | HOMO→LUMO+1                |                       |                          |
|                                |                                | HOMO→LUMO+2                |                       |                          |
|                                |                                | HOMO→LUMO+3                |                       |                          |
|                                |                                | HOMO→LUMO+4                |                       |                          |
|                                | S <sub>0</sub> →S <sub>3</sub> | HOMO-1→LUMO                | 3.86 (320)            | 0.0533                   |
|                                |                                | HOMO→LUMO+1                |                       |                          |
| HOMO→LUMO+2                    |                                |                            |                       |                          |
| HOMO→LUMO+3                    |                                |                            |                       |                          |

|                       |                           |                             |            |        |
|-----------------------|---------------------------|-----------------------------|------------|--------|
| <b>4</b>              | $S_0 \rightarrow S_1$     | HOMO $\rightarrow$ LUMO     | 3.63 (341) | 0.0659 |
|                       | $S_0 \rightarrow S_2$     | HOMO-3 $\rightarrow$ LUMO   | 4.16 (297) | 0.0398 |
|                       |                           | HOMO $\rightarrow$ LUMO+1   |            |        |
|                       |                           | HOMO $\rightarrow$ LUMO+2   |            |        |
| $S_0 \rightarrow S_3$ | HOMO-1 $\rightarrow$ LUMO | 4.24 (292)                  | 0.0021     |        |
| <b>5</b>              | $S_0 \rightarrow S_1$     | HOMO $\rightarrow$ LUMO     | 3.65 (339) | 0.0614 |
|                       | $S_0 \rightarrow S_2$     | HOMO-1 $\rightarrow$ LUMO   | 3.72 (333) | 0.0450 |
|                       | $S_0 \rightarrow S_3$     | HOMO-3 $\rightarrow$ LUMO   | 4.17 (297) | 0.0388 |
|                       |                           | HOMO-1 $\rightarrow$ LUMO+1 |            |        |
|                       |                           | HOMO $\rightarrow$ LUMO+1   |            |        |
| <b>6</b>              | $S_0 \rightarrow S_1$     | HOMO $\rightarrow$ LUMO     | 3.57 (347) | 0.0761 |
|                       | $S_0 \rightarrow S_2$     | HOMO-1 $\rightarrow$ LUMO   | 3.70 (334) | 0.0657 |
|                       | $S_0 \rightarrow S_3$     | HOMO $\rightarrow$ LUMO+1   | 4.00 (309) | 0.0425 |
|                       |                           | HOMO $\rightarrow$ LUMO+2   |            |        |
|                       |                           | HOMO $\rightarrow$ LUMO+3   |            |        |

**Table S7.** Computed orbitals for compounds 1-6

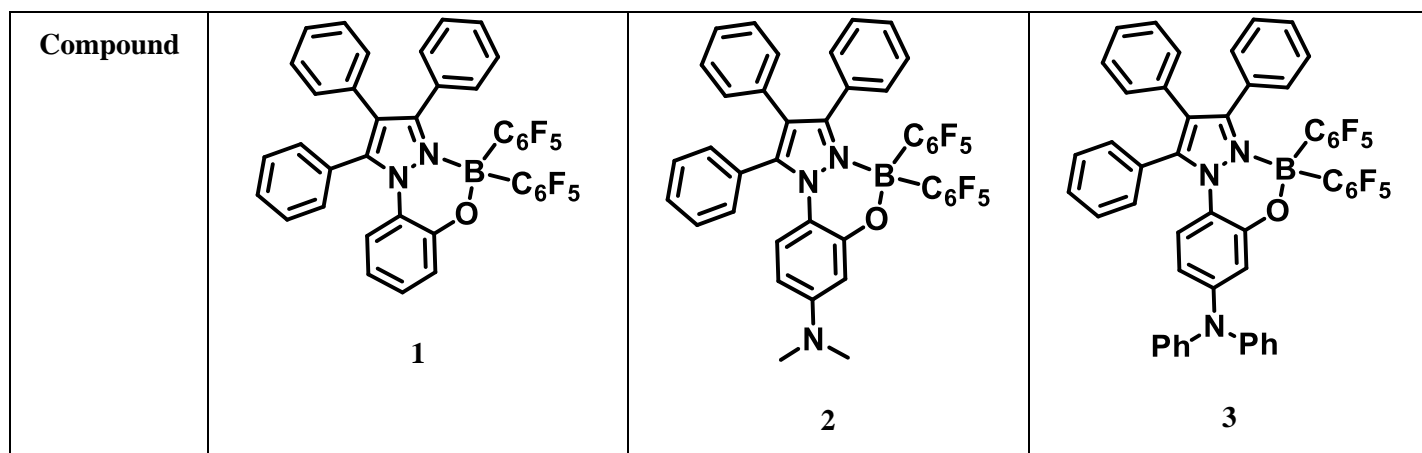

|        |                                                                                                         |                                                                                                          |                                                                                                          |
|--------|---------------------------------------------------------------------------------------------------------|----------------------------------------------------------------------------------------------------------|----------------------------------------------------------------------------------------------------------|
| LUMO+2 | 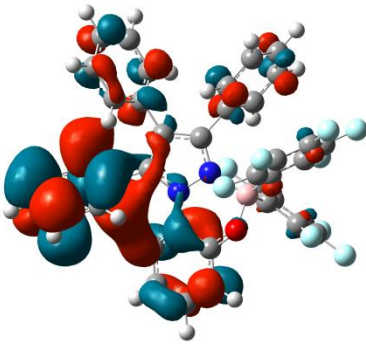 <p>188 (-0.768)</p>   |  <p>200 (-0.622)</p>   |  <p>232 (-0.720)</p>  |
| LUMO+1 |  <p>187 (-0.951)</p>  |  <p>199 (-0.807)</p>  |  <p>231 (-0.891)</p> |
| LUMO   |  <p>186 (-1.725)</p> |  <p>198 (-1.483)</p> |  <p>230(-1.634)</p> |

|        |                                                                                                         |                                                                                                          |                                                                                                           |
|--------|---------------------------------------------------------------------------------------------------------|----------------------------------------------------------------------------------------------------------|-----------------------------------------------------------------------------------------------------------|
| HOMO   | 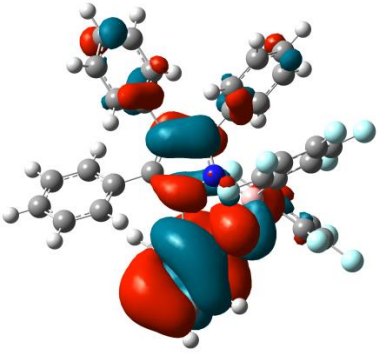 <p>185 (-6.092)</p>   |  <p>197 (-5.276)</p>   |  <p>229 (-5.143)</p>   |
| HOMO-1 |  <p>184 (-6.337)</p>  |  <p>196 (-6.115)</p>  |  <p>228 (-6.117)</p>  |
| HOMO-2 |  <p>183 (-6.419)</p> |  <p>195 (-6.235)</p> |  <p>227 (-6.288)</p> |



| Compound | 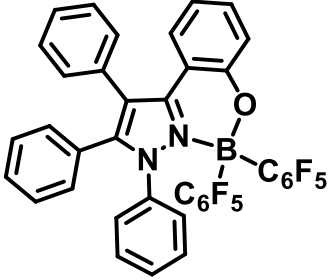 <p style="text-align: center;">4</p>              |  <p style="text-align: center;">5</p>              |  <p style="text-align: center;">6</p>              |
|----------|-------------------------------------------------------------------------------------------------------------------------------------|--------------------------------------------------------------------------------------------------------------------------------------|---------------------------------------------------------------------------------------------------------------------------------------|
| LUMO+2   |  <p style="text-align: center;">188 (-0.994)</p>  |  <p style="text-align: center;">200 (-0.603)</p>  |  <p style="text-align: center;">232 (-0.750)</p>  |
| LUMO+1   |  <p style="text-align: center;">187 (-1.093)</p> |  <p style="text-align: center;">199 (-0.943)</p> |  <p style="text-align: center;">231 (-0.951)</p> |

|        |                                                                                                         |                                                                                                          |                                                                                                           |
|--------|---------------------------------------------------------------------------------------------------------|----------------------------------------------------------------------------------------------------------|-----------------------------------------------------------------------------------------------------------|
| LUMO   | 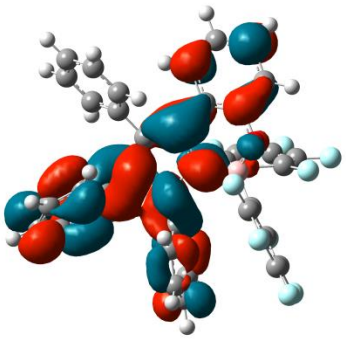 <p>186 (-1.574)</p>   |  <p>198 (-1.409)</p>   |  <p>230 (-1.403)</p>   |
| HOMO   |  <p>185 (-5.794)</p>  |  <p>197 (-5.641)</p>  |  <p>229 (-5.511)</p>  |
| HOMO-1 |  <p>184 (-6.357)</p> |  <p>196 (-5.723)</p> |  <p>228 (-5.698)</p> |

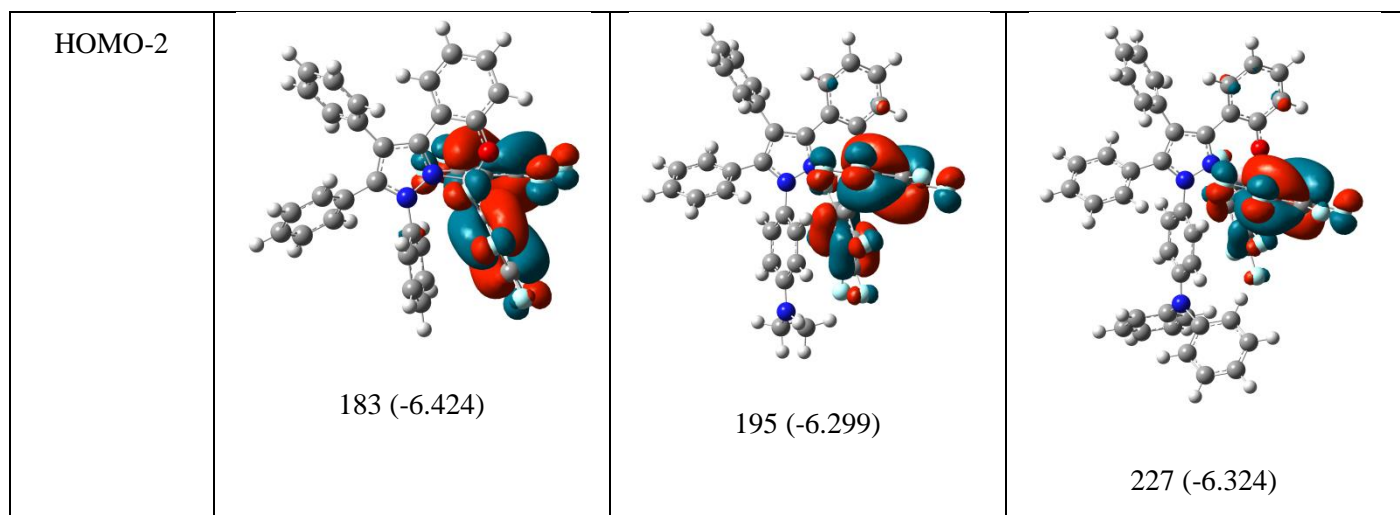

Compound 1

Center Atomic Atomic Coordinates (Angstroms)

Number Number Type X Y Z

|   |           |           |           |
|---|-----------|-----------|-----------|
| F | -0.368062 | -1.492600 | 2.188560  |
| F | -3.799018 | -1.322804 | -1.108764 |
| F | -0.034264 | 1.190088  | -2.737297 |
| F | -3.462937 | 1.123353  | 0.563329  |
| F | -1.901409 | -3.066517 | 3.680968  |
| F | -3.240138 | 4.613653  | -2.559432 |
| F | -4.428613 | 3.403533  | -0.414946 |
| O | -0.970645 | -1.239323 | -1.857323 |
| N | 1.351666  | -1.105052 | -0.450539 |
| N | 0.386146  | -0.214161 | -0.071892 |
| C | -1.588738 | -1.813945 | 1.684671  |
| C | -3.288231 | -1.737921 | 0.066289  |
| C | -2.008068 | -1.322195 | 0.450237  |
| C | -2.368470 | -2.635490 | 2.498952  |
| C | 2.392749  | 0.604815  | 0.524251  |
| C | 0.997436  | 0.818451  | 0.538910  |
| C | 0.270634  | 1.965826  | 1.126047  |
| C | -1.733778 | 1.000742  | -1.076397 |
| C | 0.549177  | 3.267969  | 0.683228  |
| H | 1.273706  | 3.421248  | -0.109879 |
| C | -0.220945 | -2.348220 | -1.788684 |
| C | -1.151801 | 1.674587  | -2.156169 |
| C | 0.966256  | -2.350672 | -1.033019 |
| C | -2.758301 | 3.458210  | -2.086183 |
| C | -1.637502 | 2.874087  | -2.668067 |
| C | 3.437656  | 1.500790  | 1.069188  |
| C | 3.857361  | -1.279376 | -0.484924 |
| C | -0.656053 | 1.772540  | 2.160909  |
| H | -0.843774 | 0.771078  | 2.527689  |
| C | -2.842249 | 1.637685  | -0.516757 |
| C | -3.360581 | 2.839097  | -0.997281 |
| C | -1.311497 | 2.866080  | 2.725689  |

|   |           |           |           |
|---|-----------|-----------|-----------|
| H | -2.031149 | 2.706470  | 3.522588  |
| C | -0.111612 | 4.355877  | 1.248872  |
| H | 0.100949  | 5.358975  | 0.891951  |
| C | -0.597566 | -3.517976 | -2.458886 |
| H | -1.507890 | -3.495289 | -3.047931 |
| C | 3.364708  | 1.955168  | 2.395659  |
| H | 2.536274  | 1.641905  | 3.022719  |
| C | -1.045353 | 4.157163  | 2.268727  |
| H | -1.560738 | 5.006595  | 2.706738  |
| C | 0.173195  | -4.669903 | -2.338946 |
| H | -0.131954 | -5.574133 | -2.856843 |
| C | 4.790268  | -1.593127 | 0.514288  |
| H | 4.558131  | -1.373890 | 1.551344  |
| C | 4.516599  | 1.914897  | 0.271917  |
| H | 4.581089  | 1.578425  | -0.757832 |
| C | 4.166614  | -1.553191 | -1.826798 |
| H | 3.451709  | -1.304313 | -2.604649 |
| C | 6.306254  | -2.460764 | -1.158293 |
| H | 7.254766  | -2.920299 | -1.419342 |
| C | 5.497710  | 2.759096  | 0.789848  |
| H | 6.324187  | 3.072200  | 0.158767  |
| C | 4.345556  | 2.801574  | 2.910063  |
| H | 4.274263  | 3.143149  | 3.938413  |
| C | 5.385497  | -2.140908 | -2.158557 |
| H | 5.616615  | -2.347391 | -3.199041 |
| C | 6.006852  | -2.185157 | 0.176755  |
| H | 6.720413  | -2.429282 | 0.957703  |
| C | 5.415380  | 3.205443  | 2.109663  |
| H | 6.179102  | 3.864734  | 2.511328  |
| B | -1.130569 | -0.442713 | -0.623774 |
| C | -3.633212 | -3.016780 | 2.070224  |
| C | -4.100755 | -2.558306 | 0.841019  |
| F | -4.397069 | -3.809123 | 2.831467  |
| C | 2.584549  | -0.617575 | -0.127870 |
| F | -5.321437 | -2.915423 | 0.417763  |
| F | -1.031810 | 3.474906  | -3.703964 |
| C | 1.712832  | -3.521108 | -0.870751 |
| H | 2.591903  | -3.525057 | -0.239598 |
| C | 1.316239  | -4.679997 | -1.532381 |
| H | 1.895688  | -5.588993 | -1.411461 |

-----  
Rotational constants (GHZ): 0.0671746 0.0526944 0.0414231

## Compound 2

-----  
Center Atomic Atomic Coordinates (Angstroms)  
Number Number Type X Y Z

-----  
F 0.539481 0.321931 2.570374

|   |           |           |           |
|---|-----------|-----------|-----------|
| F | 3.784718  | -1.081307 | -0.619798 |
| F | -0.516492 | -0.900233 | -2.800964 |
| F | 2.030097  | -3.218684 | 0.485168  |
| F | 2.458104  | 0.563782  | 4.392453  |
| F | 0.417969  | -5.472761 | -3.297397 |
| F | 1.791510  | -5.459041 | -0.932478 |
| O | 1.447541  | 0.467072  | -1.429317 |
| N | -0.758405 | 1.373477  | -0.119793 |
| N | -0.462910 | 0.054045  | 0.077659  |
| C | 1.803585  | 0.025103  | 2.170303  |
| C | 3.413088  | -0.665319 | 0.606572  |
| C | 2.064768  | -0.396500 | 0.868278  |
| C | 2.782929  | 0.156610  | 3.155150  |
| C | -2.656978 | 0.359490  | 0.453734  |
| C | -1.599995 | -0.572332 | 0.442974  |
| C | -1.666308 | -2.012185 | 0.779503  |
| C | 0.822728  | -1.922857 | -1.114804 |
| C | -2.509604 | -2.862227 | 0.047933  |
| H | -3.082564 | -2.462725 | -0.782515 |
| C | 1.391185  | 1.777766  | -1.141459 |
| C | 0.112289  | -1.992314 | -2.318499 |
| C | 0.293995  | 2.285838  | -0.422452 |
| C | 0.547426  | -4.337259 | -2.600018 |
| C | -0.031504 | -3.159611 | -3.062416 |
| C | -4.076322 | 0.094455  | 0.779219  |
| C | -2.765265 | 2.878743  | -0.155453 |
| C | -0.935254 | -2.529547 | 1.859105  |
| H | -0.310826 | -1.867221 | 2.446219  |
| C | 1.367187  | -3.133911 | -0.685546 |
| C | 1.245812  | -4.325770 | -1.398521 |
| C | -1.031422 | -3.882010 | 2.185021  |
| H | -0.458356 | -4.274410 | 3.019416  |
| C | -2.597890 | -4.213397 | 0.375247  |
| H | -3.243816 | -4.866044 | -0.204162 |
| C | 2.416818  | 2.630570  | -1.541229 |
| H | 3.239657  | 2.180285  | -2.079271 |
| C | -4.424774 | -0.545880 | 1.979331  |
| H | -3.643755 | -0.844318 | 2.671226  |
| C | -1.857297 | -4.726628 | 1.442562  |
| H | -1.926303 | -5.780444 | 1.695205  |
| C | 2.387861  | 4.004224  | -1.220532 |
| C | -3.532884 | 3.459279  | 0.864836  |
| H | -3.602058 | 2.965658  | 1.828601  |
| C | -5.099972 | 0.474082  | -0.103685 |
| H | -4.845613 | 0.961648  | -1.039356 |
| C | -2.688921 | 3.515102  | -1.404858 |
| H | -2.103022 | 3.066364  | -2.200581 |
| C | -4.115860 | 5.293965  | -0.598998 |
| H | -4.638051 | 6.230439  | -0.770744 |
| C | -6.435470 | 0.223381  | 0.208000  |
| H | -7.214120 | 0.521855  | -0.487779 |
| C | -5.760714 | -0.798570 | 2.287132  |
| H | -6.011946 | -1.294246 | 3.220185  |
| C | -3.360766 | 4.716053  | -1.622104 |

|   |           |           |           |
|---|-----------|-----------|-----------|
| H | -3.296589 | 5.199260  | -2.592282 |
| C | -4.201096 | 4.663104  | 0.642900  |
| H | -4.788984 | 5.106116  | 1.440980  |
| C | -6.770527 | -0.413713 | 1.403782  |
| H | -7.811016 | -0.610383 | 1.644732  |
| B | 1.004381  | -0.477084 | -0.384653 |
| C | 4.106105  | -0.125642 | 2.842129  |
| C | 4.424473  | -0.546450 | 1.553363  |
| F | 5.064093  | -0.000978 | 3.769020  |
| C | -2.091158 | 1.582932  | 0.070868  |
| F | 5.698505  | -0.825174 | 1.239825  |
| F | -0.729190 | -3.162586 | -4.209238 |
| C | 0.285955  | 3.627880  | -0.036327 |
| H | -0.520443 | 4.016265  | 0.572703  |
| C | 1.309465  | 4.477545  | -0.428293 |
| H | 1.271546  | 5.509747  | -0.107717 |
| N | 3.389131  | 4.856834  | -1.645812 |
| C | 4.549127  | 4.317341  | -2.336428 |
| H | 4.248674  | 3.765436  | -3.233792 |
| H | 5.190971  | 5.140138  | -2.653608 |
| H | 5.143836  | 3.640636  | -1.704895 |
| C | 3.447201  | 6.216341  | -1.135434 |
| H | 4.290396  | 6.733835  | -1.594211 |
| H | 2.538587  | 6.774885  | -1.389463 |
| H | 3.575610  | 6.254974  | -0.043479 |

-----  
 Rotational constants (GHZ): 0.0527875 0.0506596 0.0361310

### Compound 3

-----  
 Center Atomic Atomic Coordinates (Angstroms)  
 Number Number Type X Y Z

|   |           |           |           |
|---|-----------|-----------|-----------|
| F | -0.856723 | 0.008098  | 2.770954  |
| F | 0.530837  | -3.640951 | 0.044678  |
| F | -1.672022 | -0.442041 | -2.779665 |
| F | -2.370457 | -3.544887 | 0.762625  |
| F | 0.278943  | -1.152050 | 4.874229  |
| F | -4.558544 | -4.098896 | -3.347116 |
| F | -4.042299 | -4.916786 | -0.789649 |
| O | 0.387578  | -0.926082 | -1.025318 |
| N | -0.481726 | 1.449137  | -0.023967 |
| N | -1.339457 | 0.396763  | 0.137307  |
| C | -0.237879 | -1.182234 | 2.553311  |
| C | 0.451740  | -2.987352 | 1.219452  |
| C | -0.218157 | -1.760075 | 1.285665  |
| C | 0.339429  | -1.765165 | 3.681597  |
| C | -2.527639 | 2.304056  | 0.188209  |
| C | -2.581534 | 0.898147  | 0.286442  |
| C | -3.774759 | 0.057378  | 0.529335  |

|   |           |           |           |
|---|-----------|-----------|-----------|
| C | -1.882431 | -1.952599 | -0.947506 |
| C | -4.858755 | 0.106987  | -0.360209 |
| H | -4.801786 | 0.740390  | -1.239429 |
| C | 1.315395  | -0.022903 | -0.675628 |
| C | -2.199391 | -1.567815 | -2.255106 |
| C | 0.919837  | 1.200834  | -0.103009 |
| C | -3.701784 | -3.412930 | -2.580852 |
| C | -3.082569 | -2.267812 | -3.071743 |
| C | -3.663662 | 3.248857  | 0.274277  |
| C | -0.572852 | 3.944838  | -0.273428 |
| C | -3.856758 | -0.751925 | 1.672016  |
| H | -3.034321 | -0.763356 | 2.376642  |
| C | -2.543605 | -3.096270 | -0.496870 |
| C | -3.435579 | -3.826192 | -1.280822 |
| C | -4.998105 | -1.518052 | 1.905973  |
| H | -5.050280 | -2.146168 | 2.789834  |
| C | -5.994957 | -0.663217 | -0.122766 |
| H | -6.824337 | -0.628054 | -0.822553 |
| C | 2.671850  | -0.295060 | -0.850368 |
| H | 2.947065  | -1.248844 | -1.283243 |
| C | -4.554929 | 3.195619  | 1.358015  |
| H | -4.404368 | 2.456182  | 2.137891  |
| C | -6.065672 | -1.479583 | 1.008565  |
| H | -6.951236 | -2.081151 | 1.190114  |
| C | 3.645198  | 0.629995  | -0.444936 |
| C | -0.739029 | 4.977992  | 0.660562  |
| H | -1.290770 | 4.788162  | 1.575407  |
| C | -3.873562 | 4.213203  | -0.724426 |
| H | -3.198712 | 4.259839  | -1.573045 |
| C | 0.131207  | 4.197915  | -1.461582 |
| H | 0.254890  | 3.404207  | -2.191452 |
| C | 0.506855  | 6.483057  | -0.764433 |
| H | 0.927019  | 7.466155  | -0.954229 |
| C | -4.943226 | 5.103053  | -0.638255 |
| H | -5.091910 | 5.840972  | -1.421063 |
| C | -5.625814 | 4.084263  | 1.439973  |
| H | -6.304763 | 4.029639  | 2.285786  |
| C | 0.667290  | 5.461023  | -1.702789 |
| H | 1.208920  | 5.647657  | -2.625042 |
| C | -0.197304 | 6.239413  | 0.415630  |
| H | -0.327088 | 7.031113  | 1.147103  |
| C | -5.822946 | 5.041576  | 0.443550  |
| H | -6.657293 | 5.733607  | 0.508771  |
| B | -0.764976 | -1.105709 | -0.118511 |
| C | 0.992308  | -2.984887 | 3.559887  |
| C | 1.044473  | -3.606351 | 2.314588  |
| F | 1.558877  | -3.559980 | 4.627691  |
| C | -1.180800 | 2.619993  | -0.027491 |
| F | 1.667028  | -4.786488 | 2.184866  |
| F | -3.350106 | -1.844098 | -4.316833 |
| C | 1.885008  | 2.100697  | 0.357118  |
| H | 1.587540  | 3.022804  | 0.839176  |
| C | 3.233587  | 1.827958  | 0.176052  |
| H | 3.973678  | 2.541426  | 0.516365  |

|   |          |           |           |
|---|----------|-----------|-----------|
| N | 5.016398 | 0.355341  | -0.632541 |
| C | 5.979433 | 0.785470  | 0.326223  |
| C | 7.181767 | 1.371745  | -0.097025 |
| C | 5.747029 | 0.616150  | 1.699771  |
| C | 8.132519 | 1.775217  | 0.838385  |
| H | 7.363852 | 1.504372  | -1.158269 |
| C | 6.695744 | 1.039664  | 2.628524  |
| H | 4.824582 | 0.151643  | 2.031733  |
| C | 7.894337 | 1.617222  | 2.205075  |
| H | 9.059044 | 2.226576  | 0.495416  |
| H | 6.501835 | 0.901236  | 3.688218  |
| H | 8.634655 | 1.938176  | 2.931304  |
| C | 5.455289 | -0.394086 | -1.764024 |
| C | 4.978610 | -0.089037 | -3.047796 |
| C | 6.378977 | -1.437616 | -1.606145 |
| C | 5.410925 | -0.825283 | -4.148852 |
| H | 4.269021 | 0.721799  | -3.174103 |
| C | 6.819699 | -2.156606 | -2.715674 |
| H | 6.745703 | -1.679094 | -0.614160 |
| C | 6.336272 | -1.858978 | -3.990996 |
| H | 5.031092 | -0.579986 | -5.136357 |
| H | 7.533912 | -2.963212 | -2.578218 |
| H | 6.675529 | -2.426623 | -4.851877 |

-----

#### Compound 4

-----

Center Atomic Atomic Coordinates (Angstroms)  
Number Number Type X Y Z

|   |           |           |           |
|---|-----------|-----------|-----------|
| F | 0.132721  | 1.316341  | 2.125919  |
| O | -1.059398 | 1.403873  | -1.831033 |
| F | -3.681603 | 1.825748  | -0.682227 |
| F | -3.437800 | -0.749366 | 0.867073  |
| F | -0.600473 | -1.071755 | -2.942647 |
| F | -4.737090 | 3.535071  | 1.091080  |
| F | -0.939329 | 3.014749  | 3.862136  |
| N | 0.935406  | -0.873258 | 0.368567  |
| N | 0.422390  | 0.189338  | -0.322762 |
| F | -4.210682 | -4.021302 | -2.401666 |
| F | -4.865674 | -2.803507 | -0.041960 |
| F | -3.383060 | 4.157620  | 3.384445  |
| F | -2.060622 | -3.124768 | -3.835151 |
| C | 0.130548  | -1.948883 | 0.885435  |
| C | 2.296271  | -0.785710 | 0.393130  |
| C | -0.119348 | 2.342538  | -2.005763 |
| C | -1.978418 | -0.757341 | -1.022577 |
| C | 1.452092  | 0.967702  | -0.715647 |
| C | 2.666583  | 0.368382  | -0.297907 |
| C | 1.171007  | 2.201618  | -1.442722 |
| C | 3.154144  | -1.794301 | 1.049870  |
| C | 4.058769  | 0.821970  | -0.534265 |



|   |           |           |           |
|---|-----------|-----------|-----------|
| C | -1.077207 | 1.847773  | 1.794905  |
| C | -3.071147 | -1.270419 | -0.322025 |
| C | -1.717032 | 1.493316  | 0.609588  |
| C | -2.962492 | 2.103966  | 0.421927  |
| C | 2.973975  | -2.133655 | 2.399861  |
| H | 2.186190  | -1.658653 | 2.974387  |
| C | -0.416958 | 3.463363  | -2.793351 |
| H | -1.408655 | 3.534398  | -3.226720 |
| C | -1.674807 | -1.431953 | -2.210776 |
| C | -3.828749 | -2.353882 | -0.764617 |
| C | 2.115341  | 3.227068  | -1.628654 |
| H | 3.092350  | 3.143860  | -1.169425 |
| C | 4.191241  | -2.400709 | 0.324461  |
| H | 4.341992  | -2.135912 | -0.716661 |
| C | 5.023108  | -3.337074 | 0.935476  |
| H | 5.819074  | -3.802759 | 0.362518  |
| C | 0.139229  | -3.175899 | 0.218638  |
| H | 0.718659  | -3.289311 | -0.691084 |
| C | -3.498500 | -2.976320 | -1.962490 |
| C | 0.538595  | 4.453982  | -2.981718 |
| H | 0.294078  | 5.324912  | -3.583140 |
| C | 4.576185  | 0.885415  | -1.838320 |
| H | 3.939950  | 0.620808  | -2.677541 |
| C | -1.612214 | 2.726418  | 2.736819  |
| C | 1.803171  | 4.347354  | -2.388036 |
| H | 2.538815  | 5.134076  | -2.519225 |
| C | -3.536469 | 2.988359  | 1.328756  |
| C | 4.833904  | -3.674321 | 2.276559  |
| H | 5.483537  | -4.403222 | 2.751698  |
| C | -0.603437 | -1.767091 | 2.057803  |
| H | -0.573949 | -0.810706 | 2.563295  |
| C | -2.405794 | -2.515240 | -2.690336 |
| C | 3.809975  | -3.068758 | 3.006864  |
| H | 3.663007  | -3.320802 | 4.052637  |
| C | 5.891982  | 1.289746  | -2.059115 |
| H | 6.277584  | 1.334992  | -3.073329 |
| B | -1.117008 | 0.570601  | -0.618226 |
| C | -2.850332 | 3.308284  | 2.497905  |
| C | 4.890554  | 1.167563  | 0.541077  |
| H | 4.498870  | 1.123477  | 1.552578  |
| C | 6.711604  | 1.631816  | -0.981552 |
| H | 7.736556  | 1.946064  | -1.154639 |
| C | -0.613306 | -4.231382 | 0.728772  |
| H | -0.617058 | -5.186694 | 0.213751  |
| C | 6.207842  | 1.568903  | 0.318250  |
| H | 6.838597  | 1.835146  | 1.161186  |
| C | -1.365406 | -4.057286 | 1.893418  |
| H | -1.956202 | -4.880039 | 2.283883  |
| C | -1.358493 | -2.829064 | 2.555503  |
| H | -1.941298 | -2.693163 | 3.460703  |

---

Compound 5

-----  
 Center Atomic Atomic Coordinates (Angstroms)  
 Number Number Type X Y Z  
 -----

|   |           |           |           |
|---|-----------|-----------|-----------|
| F | -3.128594 | 0.998483  | -0.581669 |
| F | -5.182246 | -0.318184 | 0.474069  |
| F | -4.952922 | -1.554625 | 2.893119  |
| F | 0.775022  | 1.132844  | -2.192034 |
| F | -0.479397 | -0.166848 | 3.202876  |
| F | 0.392798  | 2.969246  | -4.071569 |
| F | -2.073374 | 3.581168  | 0.738106  |
| F | -2.583767 | -1.416892 | 4.267774  |
| F | -2.439494 | 5.416366  | -1.180418 |
| O | 0.158934  | 2.100738  | 1.796555  |
| N | 0.814208  | 0.234975  | 0.368020  |
| N | 0.752504  | -0.999467 | -0.223105 |
| F | -1.212111 | 5.140191  | -3.608721 |
| C | 2.112351  | 0.521478  | 0.601279  |
| C | -0.486388 | -1.660106 | -0.521753 |
| C | -3.920989 | -0.851923 | 2.400442  |
| C | -4.031965 | -0.225392 | 1.166981  |
| C | -0.615860 | 2.274506  | -0.607705 |
| C | -2.936307 | 0.451336  | 0.635727  |
| C | 2.461038  | 1.815062  | 1.182410  |
| C | 4.375503  | -0.753885 | 0.295150  |
| C | 2.281492  | -2.847687 | -0.901640 |
| C | 2.010519  | -1.510950 | -0.333263 |
| C | -1.636480 | -0.119079 | 2.513599  |
| C | 2.906747  | -0.577475 | 0.191113  |
| C | -2.712411 | -0.794229 | 3.085662  |
| C | -0.022819 | 2.185816  | -1.864759 |
| C | -1.227588 | -1.309991 | -1.650024 |
| H | -0.846425 | -0.555296 | -2.326909 |
| C | -1.428446 | 3.400291  | -0.430790 |
| C | -2.463719 | -1.897613 | -1.883315 |
| H | -3.028479 | -1.573444 | -2.746960 |
| C | -1.695556 | 0.523770  | 1.271401  |
| C | 4.040162  | 3.551157  | 1.808109  |
| H | 5.049181  | 3.950041  | 1.793934  |
| C | 3.764212  | 2.343179  | 1.179854  |
| H | 4.557951  | 1.805062  | 0.677044  |
| C | 2.851050  | -5.379608 | -1.963907 |
| H | 3.070554  | -6.360395 | -2.375118 |
| C | 5.001126  | -0.796680 | 1.551928  |
| H | 4.401800  | -0.676794 | 2.449477  |
| C | 3.051313  | -3.767648 | -0.173080 |
| H | 3.427217  | -3.493463 | 0.806808  |
| C | -0.962436 | -2.652644 | 0.337354  |
| H | -0.380358 | -2.935315 | 1.208436  |
| C | -0.208763 | 3.123004  | -2.881083 |
| N | -4.261964 | -3.396011 | -1.182967 |
| C | 5.161525  | -0.909867 | -0.856354 |

|   |           |           |           |
|---|-----------|-----------|-----------|
| H | 4.687685  | -0.876444 | -1.832482 |
| C | -2.193946 | -3.245974 | 0.107597  |
| H | -2.544565 | -3.989842 | 0.810584  |
| C | 2.091472  | -4.467006 | -2.697936 |
| H | 1.721505  | -4.732985 | -3.683432 |
| C | 1.807297  | -3.208065 | -2.172615 |
| H | 1.224149  | -2.499321 | -2.750061 |
| C | 6.539424  | -1.102182 | -0.754215 |
| H | 7.134052  | -1.219238 | -1.655362 |
| C | 6.378649  | -0.986048 | 1.651900  |
| H | 6.847702  | -1.016024 | 2.630961  |
| C | -1.020842 | 4.225507  | -2.649995 |
| C | -1.643093 | 4.362579  | -1.411615 |
| C | 1.421509  | 2.550932  | 1.798085  |
| C | 3.330867  | -5.026336 | -0.701835 |
| H | 3.923524  | -5.730896 | -0.126319 |
| C | 7.151700  | -1.140017 | 0.499183  |
| H | 8.224650  | -1.287954 | 0.578019  |
| C | -2.999910 | -2.859887 | -0.993340 |
| C | 3.012571  | 4.247161  | 2.457685  |
| H | 3.226387  | 5.187985  | 2.956907  |
| B | -0.371536 | 1.287785  | 0.691186  |
| C | 1.713245  | 3.755127  | 2.453544  |
| H | 0.897732  | 4.287110  | 2.931399  |
| C | -5.160092 | -2.743260 | -2.129667 |
| H | -4.741276 | -2.759298 | -3.140302 |
| H | -5.371332 | -1.700990 | -1.851037 |
| H | -6.101547 | -3.293156 | -2.160049 |
| C | -4.891013 | -4.117943 | -0.082075 |
| H | -5.865018 | -4.482146 | -0.411138 |
| H | -5.038436 | -3.488807 | 0.808644  |
| H | -4.297802 | -4.991894 | 0.202943  |

-----

Compound 6

-----

Center Atomic Atomic Coordinates (Angstroms)  
Number Number Type X Y Z

|   |           |           |           |
|---|-----------|-----------|-----------|
| F | -1.625331 | 2.290369  | 0.253543  |
| F | -3.726947 | 1.795319  | 1.805713  |
| F | -3.459448 | 0.344631  | 4.101228  |
| F | 1.905503  | 1.118971  | -2.168942 |
| F | 1.126340  | -0.188441 | 3.251717  |
| F | 1.913505  | 3.122295  | -3.910530 |
| F | 0.428159  | 4.116282  | 1.226432  |
| F | -0.995105 | -0.628783 | 4.809013  |
| F | 0.445333  | 6.116162  | -0.556248 |
| O | 2.237252  | 1.895820  | 1.837895  |
| N | 1.886432  | 0.022985  | 0.306835  |
| N | 1.251932  | -1.041460 | -0.276077 |
| F | 1.188335  | 5.650647  | -3.147348 |

|   |           |           |           |
|---|-----------|-----------|-----------|
| C | 3.206512  | -0.250492 | 0.353408  |
| C | -0.171986 | -1.098373 | -0.453404 |
| C | -2.385939 | 0.599835  | 3.342555  |
| C | -2.511895 | 1.345865  | 2.178355  |
| C | 1.167842  | 2.515067  | -0.364305 |
| C | -1.393208 | 1.588565  | 1.384256  |
| C | 4.121849  | 0.756339  | 0.882622  |
| C | 4.696316  | -2.303276 | -0.278993 |
| C | 1.800367  | -3.302308 | -1.179323 |
| C | 2.167605  | -2.006681 | -0.570499 |
| C | -0.041582 | 0.368221  | 2.872285  |
| C | 3.425103  | -1.547116 | -0.173436 |
| C | -1.134170 | 0.107317  | 3.695955  |
| C | 1.540619  | 2.341202  | -1.695414 |
| C | -0.781932 | -0.413912 | -1.507006 |
| H | -0.170976 | 0.133577  | -2.213845 |
| C | 0.811645  | 3.827280  | -0.032327 |
| C | -2.162481 | -0.431845 | -1.643970 |
| H | -2.619859 | 0.108797  | -2.462696 |
| C | -0.116300 | 1.117667  | 1.691980  |
| C | 6.335505  | 1.680330  | 1.264925  |
| H | 7.407517  | 1.644325  | 1.101008  |
| C | 5.513782  | 0.721112  | 0.686523  |
| H | 5.947102  | -0.058711 | 0.072872  |
| C | 1.170223  | -5.783386 | -2.324628 |
| H | 0.925352  | -6.743838 | -2.768271 |
| C | 5.408342  | -2.663909 | 0.876671  |
| H | 5.029508  | -2.365563 | 1.849579  |
| C | 2.214322  | -4.494858 | -0.565706 |
| H | 2.783507  | -4.451750 | 0.356682  |
| C | -0.951055 | -1.849186 | 0.428321  |
| H | -0.475211 | -2.398411 | 1.233922  |
| C | 1.549423  | 3.366287  | -2.641643 |
| N | -4.366153 | -1.070891 | -0.795965 |
| C | 5.197371  | -2.692733 | -1.530101 |
| H | 4.655891  | -2.417116 | -2.429731 |
| C | -2.332785 | -1.859310 | 0.304807  |
| H | -2.923766 | -2.421117 | 1.016468  |
| C | 0.761361  | -4.601525 | -2.944723 |
| H | 0.201096  | -4.638629 | -3.874030 |
| C | 1.073202  | -3.367199 | -2.378094 |
| H | 0.759274  | -2.452591 | -2.868499 |
| C | 6.381985  | -3.423456 | -1.623581 |
| H | 6.757728  | -3.715516 | -2.599750 |
| C | 6.593650  | -3.391645 | 0.781164  |
| H | 7.133054  | -3.661761 | 1.684217  |
| C | 1.184743  | 4.650084  | -2.258096 |
| C | 0.806541  | 4.882415  | -0.937991 |
| C | 3.560351  | 1.806945  | 1.645194  |
| C | 1.897566  | -5.726814 | -1.134828 |
| H | 2.219763  | -6.642041 | -0.647634 |
| C | 7.083475  | -3.774173 | -0.469329 |
| H | 8.006456  | -4.341579 | -0.543255 |
| C | -2.974508 | -1.114848 | -0.711987 |

|   |           |           |           |
|---|-----------|-----------|-----------|
| C | 5.773427  | 2.689278  | 2.057563  |
| H | 6.413184  | 3.436653  | 2.518251  |
| B | 1.259613  | 1.405676  | 0.851280  |
| C | 4.398651  | 2.755969  | 2.246797  |
| H | 3.940176  | 3.539112  | 2.840888  |
| C | -5.059999 | -0.064740 | -1.549067 |
| C | -4.758729 | 1.296769  | -1.401107 |
| C | -6.090067 | -0.454160 | -2.414260 |
| C | -5.472200 | 2.248049  | -2.129500 |
| H | -3.977104 | 1.608011  | -0.718162 |
| C | -6.809290 | 0.505290  | -3.125423 |
| H | -6.325421 | -1.508135 | -2.519741 |
| C | -6.499529 | 1.859400  | -2.991273 |
| H | -5.231160 | 3.299984  | -2.008381 |
| H | -7.607480 | 0.191169  | -3.791567 |
| H | -7.056042 | 2.605738  | -3.549882 |
| C | -5.167356 | -1.856933 | 0.106000  |
| C | -5.422455 | -3.203972 | -0.170105 |
| C | -5.690240 | -1.267189 | 1.262737  |
| C | -6.208699 | -3.956211 | 0.703761  |
| H | -5.001500 | -3.650796 | -1.065579 |
| C | -6.479222 | -2.022924 | 2.129675  |
| H | -5.457569 | -0.229604 | 1.481302  |
| C | -6.741612 | -3.366142 | 1.851311  |
| H | -6.408040 | -5.001086 | 0.485008  |
| H | -6.881623 | -1.563480 | 3.027413  |
| H | -7.355730 | -3.951928 | 2.528630  |

-----

## References

1. (a) Kumar, S. V.; Yadav, S. K.; Raghava, B.; Saraiah, B.; Ila, H.; Rangappa, K. S.; Hazra, A. Cyclocondensation of Arylhydrazines with 1,3-Bis(het)arylmonothio-1,3-diketones and 1,3-Bis(het)aryl-3-(methylthio)-2-propenones: Synthesis of 1-Aryl-3,5-bis(het)arylpyrazoles with Complementary Regioselectivity. *J. Org. Chem.* **2013**, *78*, 4960-4973; (b) Yugandar, S.; Konda, S.; Ila, H. Synthesis of Substituted Benzo[b]thiophenes via Sequential One-Pot, Copper-Catalyzed Intermolecular C-S Bond Formation and Palladium-Catalyzed Intramolecular Arene-Alkene Coupling of Bis(het)aryl/alkyl-1,3-monothiodiketones and o-Bromoiodoarenes. *Org. Lett.* **2017**, *19*, 1512-1515.
2. Gaussian 16, Revision A.03, M. J. Frisch, G. W. Trucks, H. B. Schlegel, G. E. Scuseria, M. A. Robb, J. R. Cheeseman, G. Scalmani, V. Barone, G. A. Petersson, H. Nakatsuji, X. Li, M. Caricato, A. V. Marenich, J. Bloino, B. G. Janesko, R. Gomperts, B. Mennucci, H. P. Hratchian, J. V. Ortiz, A. F. Izmaylov, J. L. Sonnenberg, D. Williams-Young, F. Ding, F. Lipparini, F. Egidi, J. Goings, B. Peng, A. Petrone, T. Henderson, D. Ranasinghe, V. G. Zakrzewski, J. Gao, N. Rega, G. Zheng, W. Liang, M. Hada, M. Ehara, K. Toyota, R. Fukuda, J. Hasegawa, M. Ishida, T. Nakajima, Y. Honda, O. Kitao, H. Nakai, T. Vreven, K. Throssell, J. A. Montgomery, Jr., J. E. Peralta, F. Ogliaro, M. J. Bearpark, J. J. Heyd, E. N. Brothers, K. N. Kudin, V. N. Staroverov, T. A. Keith, R. Kobayashi, J. Normand, K. Raghavachari, A. P. Rendell, J. C. Burant, S. S. Iyengar, J. Tomasi, M. Cossi, J. M. Millam, M. Klene, C. Adamo, R. Cammi, J. W. Ochterski, R. L. Martin, K. Morokuma, O. Farkas, J. B. Foresman, and D. J. Fox, Gaussian, Inc., Wallingford CT, 2016.
